# Supplementary material
Source: PubMed Central journal article supplement (PMC2940317)
Supplement: NIHMS227182-supplement-2_si_002.pdf [file NIHMS227182-supplement-2_si_002.pdf]

**Supplemental Table 1. Per residue deuterium incorporation factors,  $D_0^i$ , H/D exchange rate constants,  $k_{xc}^i$ , residue unfolding constants,  $K_{ui}$ , and calculated from molecular dynamics simulation**

| Residue |                   | $D_0^i$          |                    |                    |                    | $k_{xc}^i$ |          |          |          | $K_{ui}$ |          |          |          |
|---------|-------------------|------------------|--------------------|--------------------|--------------------|------------|----------|----------|----------|----------|----------|----------|----------|
|         |                   | DSH <sup>a</sup> | min <sup>b,c</sup> | avg <sup>b,d</sup> | max <sup>b,e</sup> | DSH        | min      | avg      | max      | DSH      | min      | avg      | max      |
| E2A     | Expr <sup>f</sup> | 0.91             | 0.81               | 0.98               | 1                  | 6.08E-02   | 4.17E-02 | 4.77E-01 | 5.76E-01 | 4.13E-04 | 2.83E-04 | 3.24E-03 | 3.91E-03 |
|         | Pred <sup>g</sup> | 1                | 0.56               | 0.89               | 1                  | 5.76E-01   | 2.07E-02 | 3.25E-01 | 5.76E-01 | 3.91E-03 | 1.41E-04 | 2.21E-03 | 3.91E-03 |
| E2B     | Expr              | 0.94             | 0.22               | 0.82               | 1                  | 6.90E-02   | 6.35E-03 | 2.67E-01 | 5.76E-01 | 4.69E-04 | 4.31E-05 | 1.82E-03 | 3.91E-03 |
|         | Pred              | 0.91             | 0.03               | 0.61               | 1                  | 5.91E-02   | 7.56E-04 | 1.28E-01 | 5.76E-01 | 4.02E-04 | 5.14E-06 | 8.69E-04 | 3.91E-03 |
| Q5A     | Expr              | 0.91             | 0.93               | 1                  | 1                  | 6.08E-02   | 6.54E-02 | 5.32E-01 | 5.76E-01 | 5.36E-03 | 5.77E-03 | 4.69E-02 | 5.08E-02 |
|         | Pred              | 1                | 1                  | 1                  | 1                  | 5.76E-01   | 5.76E-01 | 5.76E-01 | 5.76E-01 | 5.08E-02 | 5.08E-02 | 5.08E-02 | 5.08E-02 |
| Q5B     | Expr              | 0.98             | 0.04               | 0.26               | 0.67               | 1.01E-01   | 1.08E-03 | 9.16E-03 | 2.80E-02 | 8.87E-03 | 9.55E-05 | 8.08E-04 | 2.47E-03 |
|         | Pred              | 1                | 0.03               | 0.14               | 0.39               | 5.76E-01   | 7.16E-04 | 4.07E-03 | 1.23E-02 | 5.08E-02 | 6.32E-05 | 3.59E-04 | 1.09E-03 |
| S6A     | Expr              | 0.91             | 0.93               | 1                  | 1                  | 6.08E-02   | 6.54E-02 | 5.32E-01 | 5.76E-01 | 9.53E-04 | 1.03E-03 | 8.35E-03 | 9.03E-03 |
|         | Pred              | 1                | 0.94               | 1                  | 1                  | 5.76E-01   | 6.90E-02 | 5.52E-01 | 5.76E-01 | 9.03E-03 | 1.08E-03 | 8.65E-03 | 9.03E-03 |
| S6B     | Expr              | 0.31             | 0.05               | 0.54               | 0.98               | 9.11E-03   | 1.38E-03 | 2.59E-02 | 9.35E-02 | 1.43E-04 | 2.17E-05 | 4.06E-04 | 1.47E-03 |
|         | Pred              | 0.28             | 0.05               | 0.3                | 0.88               | 8.07E-03   | 1.28E-03 | 1.11E-02 | 5.40E-02 | 1.27E-04 | 2.01E-05 | 1.75E-04 | 8.47E-04 |
| W8A     | Expr              | 0.72             | 0.03               | 0.23               | 0.79               | 3.17E-02   | 8.91E-04 | 7.65E-03 | 3.86E-02 | 8.24E-03 | 2.32E-04 | 1.99E-03 | 1.00E-02 |
|         | Pred              | 0.79             | 0.03               | 0.18               | 0.85               | 3.87E-02   | 8.79E-04 | 6.14E-03 | 4.71E-02 | 1.01E-02 | 2.29E-04 | 1.60E-03 | 1.23E-02 |
| W8B     | Expr              | 0.98             | 0.4                | 0.85               | 1                  | 1.01E-01   | 1.28E-02 | 1.95E-01 | 5.76E-01 | 2.62E-02 | 3.33E-03 | 5.07E-02 | 1.50E-01 |
|         | Pred              | 1                | 0.29               | 0.55               | 1                  | 5.76E-01   | 8.60E-03 | 4.99E-02 | 5.76E-01 | 1.50E-01 | 2.24E-03 | 1.30E-02 | 1.50E-01 |
| D9A     | Expr              | 0.91             | 0.93               | 0.99               | 1                  | 6.08E-02   | 6.54E-02 | 5.27E-01 | 5.76E-01 | 9.07E-03 | 9.76E-03 | 7.87E-02 | 8.59E-02 |
|         | Pred              | 1                | 0.86               | 0.98               | 1                  | 5.76E-01   | 4.95E-02 | 4.55E-01 | 5.76E-01 | 8.59E-02 | 7.39E-03 | 6.79E-02 | 8.59E-02 |
| D9B     | Expr              | 0.98             | 0.12               | 0.91               | 1                  | 1.01E-01   | 3.07E-03 | 3.53E-01 | 5.76E-01 | 1.50E-02 | 4.58E-04 | 5.27E-02 | 8.59E-02 |
|         | Pred              | 1                | 0.05               | 0.64               | 1                  | 5.76E-01   | 1.28E-03 | 7.87E-02 | 5.76E-01 | 8.59E-02 | 1.91E-04 | 1.17E-02 | 8.59E-02 |
| R10A    | Expr              | 0.91             | 0.83               | 0.98               | 1                  | 6.08E-02   | 4.47E-02 | 4.58E-01 | 5.76E-01 | 4.45E-03 | 3.27E-03 | 3.35E-02 | 4.21E-02 |
|         | Pred              | 1                | 0.59               | 0.87               | 1                  | 5.76E-01   | 2.23E-02 | 1.51E-01 | 5.76E-01 | 4.21E-02 | 1.63E-03 | 1.11E-02 | 4.21E-02 |
| R10B    | Expr              | 0.51             | 0.68               | 0.91               | 1                  | 1.80E-02   | 2.87E-02 | 2.75E-01 | 5.76E-01 | 1.31E-03 | 2.10E-03 | 2.02E-02 | 4.21E-02 |
|         | Pred              | 0.39             | 0.33               | 0.66               | 0.99               | 1.24E-02   | 9.91E-03 | 3.78E-02 | 1.20E-01 | 9.11E-04 | 7.25E-04 | 2.76E-03 | 8.76E-03 |
| V11A    | Expr              | 0.91             | 0.26               | 0.66               | 1                  | 6.08E-02   | 7.62E-03 | 5.39E-02 | 5.76E-01 | 1.07E-02 | 1.34E-03 | 9.48E-03 | 1.01E-01 |
|         | Pred              | 1                | 0.19               | 0.4                | 0.89               | 5.76E-01   | 5.25E-03 | 1.56E-02 | 5.42E-02 | 1.01E-01 | 9.23E-04 | 2.74E-03 | 9.54E-03 |
| V11B    | Expr              | 0.98             | 0.08               | 0.65               | 1                  | 1.01E-01   | 2.12E-03 | 9.02E-02 | 5.76E-01 | 1.77E-02 | 3.73E-04 | 1.59E-02 | 1.01E-01 |
|         | Pred              | 1                | 0.03               | 0.39               | 0.96               | 5.76E-01   | 6.64E-04 | 1.77E-02 | 7.95E-02 | 1.01E-01 | 1.17E-04 | 3.11E-03 | 1.40E-02 |
| K12A    | Expr              | 0.85             | 0.81               | 0.98               | 1                  | 4.78E-02   | 4.14E-02 | 4.62E-01 | 5.76E-01 | 4.21E-03 | 3.65E-03 | 4.08E-02 | 5.08E-02 |
|         | Pred              | 0.93             | 0.75               | 0.89               | 1                  | 6.57E-02   | 3.49E-02 | 1.30E-01 | 5.76E-01 | 5.79E-03 | 3.07E-03 | 1.15E-02 | 5.08E-02 |
| K12B    | Expr              | 0.98             | 0.77               | 0.98               | 1                  | 1.01E-01   | 3.64E-02 | 4.78E-01 | 5.76E-01 | 8.87E-03 | 3.21E-03 | 4.21E-02 | 5.08E-02 |
|         | Pred              | 1                | 0.4                | 0.91               | 1                  | 5.76E-01   | 1.29E-02 | 3.80E-01 | 5.76E-01 | 5.08E-02 | 1.13E-03 | 3.35E-02 | 5.08E-02 |
| D13A    | Expr              | 0.91             | 0.9                | 0.99               | 1                  | 6.08E-02   | 5.75E-02 | 5.02E-01 | 5.76E-01 | 5.34E-03 | 5.05E-03 | 4.41E-02 | 5.06E-02 |
|         | Pred              | 1                | 0.71               | 0.97               | 1                  | 5.76E-01   | 3.07E-02 | 4.07E-01 | 5.76E-01 | 5.06E-02 | 2.70E-03 | 3.58E-02 | 5.06E-02 |
| D13B    | Expr              | 0.98             | 0.91               | 0.99               | 1                  | 1.01E-01   | 5.99E-02 | 5.27E-01 | 5.76E-01 | 8.83E-03 | 5.26E-03 | 4.63E-02 | 5.06E-02 |
|         | Pred              | 1                | 0.72               | 0.99               | 1                  | 5.76E-01   | 3.16E-02 | 5.50E-01 | 5.76E-01 | 5.06E-02 | 2.77E-03 | 4.83E-02 | 5.06E-02 |
| L14A    | Expr              | 0.37             | 0.45               | 0.79               | 0.96               | 1.16E-02   | 1.50E-02 | 4.84E-02 | 8.24E-02 | 3.90E-03 | 5.03E-03 | 1.62E-02 | 2.75E-02 |
|         | Pred              | 0.43             | 0.5                | 0.78               | 1                  | 1.39E-02   | 1.73E-02 | 1.39E-01 | 5.76E-01 | 4.65E-03 | 5.78E-03 | 4.64E-02 | 1.93E-01 |
| L14B    | Expr              | 0.05             | 0.05               | 0.57               | 0.68               | 1.27E-03   | 1.28E-03 | 2.23E-02 | 2.81E-02 | 4.23E-04 | 4.28E-04 | 7.47E-03 | 9.41E-03 |

| Residue |      | $D_o^i$          |                    |                    |                    | $k_{xc}^i$ |          |          |          | $K_u^i$  |          |          |          |
|---------|------|------------------|--------------------|--------------------|--------------------|------------|----------|----------|----------|----------|----------|----------|----------|
|         |      | DSH <sup>a</sup> | min <sup>b,c</sup> | avg <sup>b,d</sup> | max <sup>b,e</sup> | DSH        | min      | avg      | max      | DSH      | min      | avg      | max      |
| A15A    | Pred | 0.05             | 0.05               | 0.66               | 1                  | 1.28E-03   | 1.28E-03 | 5.95E-02 | 5.76E-01 | 4.29E-04 | 4.29E-04 | 1.99E-02 | 1.93E-01 |
| A15A    | Expr | 0.27             | 0.03               | 0.08               | 0.33               | 7.72E-03   | 7.74E-04 | 2.28E-03 | 9.94E-03 | 7.29E-04 | 7.31E-05 | 2.15E-04 | 9.40E-04 |
| A15A    | Pred | 0.28             | 0.02               | 0.06               | 0.2                | 8.28E-03   | 6.06E-04 | 1.67E-03 | 5.47E-03 | 7.83E-04 | 5.73E-05 | 1.58E-04 | 5.16E-04 |
| A15B    | Expr | 0.6              | 0.33               | 0.64               | 0.72               | 2.27E-02   | 1.01E-02 | 2.59E-02 | 3.23E-02 | 2.14E-03 | 9.56E-04 | 2.45E-03 | 3.05E-03 |
| A15B    | Pred | 0.72             | 0.34               | 0.9                | 1                  | 3.21E-02   | 1.04E-02 | 3.50E-01 | 5.76E-01 | 3.04E-03 | 9.80E-04 | 3.31E-02 | 5.44E-02 |
| T16A    | Expr | 0.39             | 0.02               | 0.33               | 0.79               | 1.22E-02   | 6.26E-04 | 1.18E-02 | 3.88E-02 | 8.33E-04 | 4.29E-05 | 8.07E-04 | 2.65E-03 |
| T16A    | Pred | 0.41             | 0.02               | 0.31               | 0.97               | 1.32E-02   | 5.46E-04 | 1.40E-02 | 8.88E-02 | 9.05E-04 | 3.74E-05 | 9.56E-04 | 6.08E-03 |
| T16B    | Expr | 0.75             | 0.61               | 0.68               | 0.86               | 3.44E-02   | 2.36E-02 | 2.94E-02 | 4.95E-02 | 2.36E-03 | 1.62E-03 | 2.01E-03 | 3.39E-03 |
| T16B    | Pred | 0.95             | 0.82               | 0.99               | 1                  | 7.26E-02   | 4.33E-02 | 5.50E-01 | 5.76E-01 | 4.97E-03 | 2.97E-03 | 3.77E-02 | 3.94E-02 |
| V17A    | Expr | 0.55             | 0.64               | 0.93               | 1                  | 1.97E-02   | 2.55E-02 | 3.51E-01 | 5.76E-01 | 3.63E-03 | 4.70E-03 | 6.47E-02 | 1.06E-01 |
| V17A    | Pred | 0.61             | 0.49               | 0.75               | 1                  | 2.37E-02   | 1.69E-02 | 6.56E-02 | 5.76E-01 | 4.36E-03 | 3.11E-03 | 1.21E-02 | 1.06E-01 |
| V17B    | Expr | 0.09             | 0.03               | 0.21               | 0.45               | 2.42E-03   | 7.40E-04 | 6.39E-03 | 1.51E-02 | 4.47E-04 | 1.36E-04 | 1.18E-03 | 2.78E-03 |
| V17B    | Pred | 0.09             | 0.03               | 0.26               | 0.63               | 2.47E-03   | 7.44E-04 | 8.72E-03 | 2.52E-02 | 4.56E-04 | 1.37E-04 | 1.61E-03 | 4.64E-03 |
| Y18A    | Expr | 0.4              | 0.03               | 0.13               | 0.45               | 1.29E-02   | 7.97E-04 | 3.86E-03 | 1.49E-02 | 1.93E-03 | 1.19E-04 | 5.79E-04 | 2.23E-03 |
| Y18A    | Pred | 0.45             | 0.03               | 0.09               | 0.6                | 1.51E-02   | 8.05E-04 | 2.81E-03 | 2.26E-02 | 2.26E-03 | 1.20E-04 | 4.21E-04 | 3.38E-03 |
| Y18B    | Expr | 0.03             | 0.03               | 0.08               | 0.21               | 6.65E-04   | 7.83E-04 | 2.07E-03 | 5.80E-03 | 9.96E-05 | 1.17E-04 | 3.09E-04 | 8.68E-04 |
| Y18B    | Pred | 0.03             | 0.03               | 0.08               | 0.25               | 6.69E-04   | 8.01E-04 | 2.23E-03 | 7.04E-03 | 1.00E-04 | 1.20E-04 | 3.34E-04 | 1.05E-03 |
| D20A    | Expr | 0.9              | 0.83               | 0.99               | 1                  | 5.72E-02   | 4.47E-02 | 5.25E-01 | 5.76E-01 | 9.15E-03 | 7.15E-03 | 8.40E-02 | 9.20E-02 |
| D20A    | Pred | 1                | 0.49               | 0.93               | 1                  | 5.76E-01   | 1.69E-02 | 4.02E-01 | 5.76E-01 | 9.20E-02 | 2.70E-03 | 6.43E-02 | 9.20E-02 |
| D20B    | Expr | 1                | 0.87               | 0.99               | 1                  | 5.76E-01   | 5.13E-02 | 5.27E-01 | 5.76E-01 | 9.20E-02 | 8.21E-03 | 8.42E-02 | 9.20E-02 |
| D20B    | Pred | 1                | 0.62               | 0.9                | 1                  | 5.76E-01   | 2.39E-02 | 1.84E-01 | 5.76E-01 | 9.20E-02 | 3.82E-03 | 2.94E-02 | 9.20E-02 |
| V21A    | Expr | 0.43             | 0.49               | 0.98               | 1                  | 1.42E-02   | 1.69E-02 | 5.27E-01 | 5.76E-01 | 6.25E-03 | 7.45E-03 | 2.33E-01 | 2.54E-01 |
| V21A    | Pred | 0.46             | 0.4                | 0.68               | 0.92               | 1.53E-02   | 1.29E-02 | 3.12E-02 | 6.46E-02 | 6.73E-03 | 5.69E-03 | 1.38E-02 | 2.85E-02 |
| V21B    | Expr | 0.15             | 0.03               | 0.13               | 0.85               | 4.09E-03   | 8.84E-04 | 4.77E-03 | 4.73E-02 | 1.80E-03 | 3.90E-04 | 2.10E-03 | 2.09E-02 |
| V21B    | Pred | 0.13             | 0.03               | 0.09               | 0.89               | 3.55E-03   | 7.26E-04 | 3.93E-03 | 5.45E-02 | 1.57E-03 | 3.20E-04 | 1.73E-03 | 2.40E-02 |
| L22A    | Expr | 0.86             | 0.03               | 0.14               | 0.85               | 4.94E-02   | 8.21E-04 | 5.29E-03 | 4.71E-02 | 1.51E-02 | 2.51E-04 | 1.62E-03 | 1.44E-02 |
| L22A    | Pred | 0.95             | 0.03               | 0.11               | 0.96               | 7.66E-02   | 7.42E-04 | 5.47E-03 | 8.14E-02 | 2.34E-02 | 2.27E-04 | 1.67E-03 | 2.49E-02 |
| L22B    | Expr | 1                | 0.16               | 0.81               | 1                  | 5.76E-01   | 4.29E-03 | 2.68E-01 | 5.76E-01 | 1.76E-01 | 1.31E-03 | 8.19E-02 | 1.76E-01 |
| L22B    | Pred | 1                | 0.05               | 0.58               | 1                  | 5.76E-01   | 1.28E-03 | 5.10E-02 | 5.76E-01 | 1.76E-01 | 3.92E-04 | 1.56E-02 | 1.76E-01 |
| K23A    | Expr | 0.51             | 0.05               | 0.56               | 0.98               | 1.81E-02   | 1.40E-03 | 2.77E-02 | 1.02E-01 | 1.87E-03 | 1.45E-04 | 2.87E-03 | 1.06E-02 |
| K23A    | Pred | 0.57             | 0.03               | 0.31               | 0.6                | 2.13E-02   | 8.80E-04 | 9.89E-03 | 2.28E-02 | 2.20E-03 | 9.12E-05 | 1.02E-03 | 2.36E-03 |
| K23B    | Expr | 1                | 0.61               | 0.96               | 1                  | 5.76E-01   | 2.34E-02 | 4.28E-01 | 5.76E-01 | 5.96E-02 | 2.43E-03 | 4.43E-02 | 5.96E-02 |
| K23B    | Pred | 0.64             | 0.23               | 0.71               | 1                  | 2.54E-02   | 6.48E-03 | 6.35E-02 | 5.76E-01 | 2.63E-03 | 6.71E-04 | 6.58E-03 | 5.96E-02 |
| D24A    | Expr | 0.9              | 0.81               | 0.99               | 1                  | 5.72E-02   | 4.18E-02 | 5.50E-01 | 5.76E-01 | 5.03E-03 | 3.67E-03 | 4.83E-02 | 5.06E-02 |
| D24A    | Pred | 1                | 0.84               | 0.97               | 1                  | 5.76E-01   | 4.60E-02 | 4.30E-01 | 5.76E-01 | 5.06E-02 | 4.04E-03 | 3.77E-02 | 5.06E-02 |
| D24B    | Expr | 1                | 0.96               | 1                  | 1                  | 5.76E-01   | 7.85E-02 | 5.29E-01 | 5.76E-01 | 5.06E-02 | 6.90E-03 | 4.65E-02 | 5.06E-02 |
| D24B    | Pred | 1                | 0.78               | 0.98               | 1                  | 5.76E-01   | 3.75E-02 | 5.01E-01 | 5.76E-01 | 5.06E-02 | 3.30E-03 | 4.40E-02 | 5.06E-02 |
| S25A    | Expr | 0.66             | 0.51               | 0.86               | 1                  | 2.70E-02   | 1.77E-02 | 2.47E-01 | 5.76E-01 | 1.01E-03 | 6.66E-04 | 9.28E-03 | 2.16E-02 |
| S25A    | Pred | 0.71             | 0.33               | 0.46               | 0.62               | 3.11E-02   | 1.01E-02 | 1.59E-02 | 2.45E-02 | 1.17E-03 | 3.80E-04 | 5.97E-04 | 9.20E-04 |
| S25B    | Expr | 0.16             | 0.08               | 0.67               | 1                  | 4.40E-03   | 2.07E-03 | 1.81E-01 | 5.76E-01 | 1.65E-04 | 7.77E-05 | 6.80E-03 | 2.16E-02 |
| S25B    | Pred | 0.14             | 0.05               | 0.44               | 1                  | 3.83E-03   | 1.28E-03 | 6.87E-02 | 5.76E-01 | 1.44E-04 | 4.81E-05 | 2.58E-03 | 2.16E-02 |
| G26A    | Expr | 0.8              | 0.03               | 0.12               | 0.88               | 4.02E-02   | 7.79E-04 | 4.99E-03 | 5.27E-02 | 6.31E-04 | 1.22E-05 | 7.82E-05 | 8.26E-04 |
| G26A    | Pred | 0.89             | 0.03               | 0.1                | 1                  | 5.53E-02   | 7.04E-04 | 2.89E-02 | 5.76E-01 | 8.67E-04 | 1.10E-05 | 4.54E-04 | 9.03E-03 |

| Residue |      | $D_o^i$          |                    |                    |                    | $k_{xc}^i$ |          |          |          | $K_u^i$  |          |          |          |
|---------|------|------------------|--------------------|--------------------|--------------------|------------|----------|----------|----------|----------|----------|----------|----------|
|         |      | DSH <sup>a</sup> | min <sup>b,c</sup> | avg <sup>b,d</sup> | max <sup>b,e</sup> | DSH        | min      | avg      | max      | DSH      | min      | avg      | max      |
| G26B    | Expr | 0.35             | 0.03               | 0.09               | 0.43               | 1.07E-02   | 8.05E-04 | 2.43E-03 | 1.40E-02 | 1.68E-04 | 1.26E-05 | 3.81E-05 | 2.19E-04 |
|         | Pred | 0.26             | 0.03               | 0.06               | 0.44               | 7.63E-03   | 7.99E-04 | 1.82E-03 | 1.47E-02 | 1.20E-04 | 1.25E-05 | 2.85E-05 | 2.31E-04 |
| R27A    | Expr | 0.8              | 0.88               | 0.99               | 1                  | 4.02E-02   | 5.27E-02 | 5.51E-01 | 5.76E-01 | 1.32E-03 | 1.73E-03 | 1.80E-02 | 1.89E-02 |
|         | Pred | 0.89             | 0.51               | 0.76               | 1                  | 5.51E-02   | 1.77E-02 | 8.94E-02 | 5.76E-01 | 1.81E-03 | 5.81E-04 | 2.93E-03 | 1.89E-02 |
| R27B    | Expr | 1                | 0.89               | 0.99               | 1                  | 5.76E-01   | 5.63E-02 | 5.03E-01 | 5.76E-01 | 1.89E-02 | 1.85E-03 | 1.65E-02 | 1.89E-02 |
|         | Pred | 0.9              | 0.4                | 0.77               | 1                  | 5.66E-02   | 1.26E-02 | 2.11E-01 | 5.76E-01 | 1.86E-03 | 4.14E-04 | 6.91E-03 | 1.89E-02 |
| D28A    | Expr | 0.81             | 0.85               | 0.99               | 1                  | 4.11E-02   | 4.70E-02 | 5.50E-01 | 5.76E-01 | 2.87E-03 | 3.28E-03 | 3.84E-02 | 4.02E-02 |
|         | Pred | 0.89             | 0.87               | 0.99               | 1                  | 5.45E-02   | 5.05E-02 | 4.81E-01 | 5.76E-01 | 3.80E-03 | 3.53E-03 | 3.36E-02 | 4.02E-02 |
| D28B    | Expr | 1                | 0.96               | 1                  | 1                  | 5.76E-01   | 7.85E-02 | 5.29E-01 | 5.76E-01 | 4.02E-02 | 5.48E-03 | 3.69E-02 | 4.02E-02 |
|         | Pred | 1                | 0.68               | 0.91               | 1                  | 5.76E-01   | 2.82E-02 | 2.78E-01 | 5.76E-01 | 4.02E-02 | 1.97E-03 | 1.94E-02 | 4.02E-02 |
| V30A    | Expr | 0.99             | 0.29               | 0.56               | 1                  | 1.14E-01   | 8.72E-03 | 4.90E-02 | 5.76E-01 | 2.96E-02 | 2.27E-03 | 1.28E-02 | 1.50E-01 |
|         | Pred | 0.82             | 0.03               | 0.09               | 0.83               | 4.25E-02   | 7.41E-04 | 3.32E-03 | 4.40E-02 | 1.10E-02 | 1.93E-04 | 8.64E-04 | 1.15E-02 |
| V30B    | Expr | 1                | 0.33               | 0.72               | 1                  | 5.76E-01   | 1.00E-02 | 2.32E-01 | 5.76E-01 | 1.50E-01 | 2.60E-03 | 6.04E-02 | 1.50E-01 |
|         | Pred | 0.98             | 0.03               | 0.16               | 1                  | 9.23E-02   | 6.57E-04 | 1.01E-02 | 1.48E-01 | 2.40E-02 | 1.71E-04 | 2.63E-03 | 3.86E-02 |
| S31A    | Expr | 1                | 0.9                | 1                  | 1                  | 5.76E-01   | 5.83E-02 | 5.51E-01 | 5.76E-01 | 1.97E-02 | 2.00E-03 | 1.89E-02 | 1.97E-02 |
|         | Pred | 0.86             | 0.53               | 0.69               | 1                  | 4.92E-02   | 1.86E-02 | 8.05E-02 | 5.76E-01 | 1.69E-03 | 6.39E-04 | 2.76E-03 | 1.97E-02 |
| S31B    | Expr | 1                | 1                  | 1                  | 1                  | 5.76E-01   | 5.76E-01 | 5.76E-01 | 5.76E-01 | 1.97E-02 | 1.97E-02 | 1.97E-02 | 1.97E-02 |
|         | Pred | 1                | 0.28               | 0.56               | 1                  | 5.76E-01   | 8.27E-03 | 4.99E-02 | 5.76E-01 | 1.97E-02 | 2.84E-04 | 1.71E-03 | 1.97E-02 |
| Q32A    | Expr | 0.85             | 0.95               | 1                  | 1                  | 4.76E-02   | 7.51E-02 | 5.52E-01 | 5.76E-01 | 1.21E-03 | 1.91E-03 | 1.40E-02 | 1.46E-02 |
|         | Pred | 0.63             | 0.45               | 0.72               | 0.93               | 2.50E-02   | 1.50E-02 | 3.51E-02 | 6.64E-02 | 6.36E-04 | 3.81E-04 | 8.93E-04 | 1.69E-03 |
| Q32B    | Expr | 1                | 0.65               | 0.98               | 1                  | 1.39E-01   | 2.60E-02 | 5.49E-01 | 5.76E-01 | 3.53E-03 | 6.62E-04 | 1.40E-02 | 1.46E-02 |
|         | Pred | 0.89             | 0.04               | 0.51               | 0.79               | 5.44E-02   | 1.07E-03 | 1.97E-02 | 3.96E-02 | 1.38E-03 | 2.72E-05 | 5.00E-04 | 1.01E-03 |
| F33A    | Expr | 1                | 0.41               | 0.6                | 1                  | 5.76E-01   | 1.34E-02 | 9.88E-02 | 5.76E-01 | 3.68E-02 | 8.53E-04 | 6.31E-03 | 3.68E-02 |
|         | Pred | 1                | 0.03               | 0.11               | 1                  | 5.76E-01   | 8.33E-04 | 2.91E-02 | 5.76E-01 | 3.68E-02 | 5.32E-05 | 1.86E-03 | 3.68E-02 |
| F33B    | Expr | 0.9              | 0.24               | 0.49               | 0.94               | 5.80E-02   | 6.99E-03 | 1.94E-02 | 6.93E-02 | 3.71E-03 | 4.46E-04 | 1.24E-03 | 4.43E-03 |
|         | Pred | 0.75             | 0.02               | 0.06               | 0.49               | 3.42E-02   | 5.68E-04 | 1.80E-03 | 1.69E-02 | 2.18E-03 | 3.63E-05 | 1.15E-04 | 1.08E-03 |
| E34A    | Expr | 0.98             | 0.93               | 1                  | 1                  | 9.80E-02   | 6.80E-02 | 5.51E-01 | 5.76E-01 | 1.60E-02 | 1.11E-02 | 9.01E-02 | 9.40E-02 |
|         | Pred | 1                | 0.13               | 0.74               | 1                  | 5.76E-01   | 3.40E-03 | 1.47E-01 | 5.76E-01 | 9.40E-02 | 5.54E-04 | 2.40E-02 | 9.40E-02 |
| E34B    | Expr | 0.92             | 0.91               | 1                  | 1                  | 6.28E-02   | 5.91E-02 | 5.51E-01 | 5.76E-01 | 1.03E-02 | 9.65E-03 | 9.00E-02 | 9.40E-02 |
|         | Pred | 0.78             | 0.46               | 0.73               | 1                  | 3.78E-02   | 1.56E-02 | 1.09E-01 | 5.76E-01 | 6.17E-03 | 2.55E-03 | 1.78E-02 | 9.40E-02 |
| G35A    | Expr | 0.98             | 0.99               | 1                  | 1                  | 9.80E-02   | 1.08E-01 | 5.53E-01 | 5.76E-01 | 4.32E-03 | 4.77E-03 | 2.44E-02 | 2.54E-02 |
|         | Pred | 1                | 0.58               | 0.87               | 1                  | 5.76E-01   | 2.15E-02 | 2.45E-01 | 5.76E-01 | 2.54E-02 | 9.46E-04 | 1.08E-02 | 2.54E-02 |
| G35B    | Expr | 1                | 1                  | 1                  | 1                  | 5.76E-01   | 5.76E-01 | 5.76E-01 | 5.76E-01 | 2.54E-02 | 2.54E-02 | 2.54E-02 | 2.54E-02 |
|         | Pred | 1                | 0.57               | 0.91               | 1                  | 5.76E-01   | 2.10E-02 | 3.50E-01 | 5.76E-01 | 2.54E-02 | 9.23E-04 | 1.54E-02 | 2.54E-02 |
| S36A    | Expr | 0.52             | 0.54               | 0.98               | 1                  | 1.86E-02   | 1.97E-02 | 5.49E-01 | 5.76E-01 | 3.12E-04 | 3.30E-04 | 9.23E-03 | 9.67E-03 |
|         | Pred | 0.51             | 0.12               | 0.83               | 1                  | 1.80E-02   | 3.16E-03 | 1.73E-01 | 5.76E-01 | 3.03E-04 | 5.31E-05 | 2.90E-03 | 9.67E-03 |
| S36B    | Expr | 0.7              | 0.14               | 0.61               | 1                  | 3.05E-02   | 3.64E-03 | 2.55E-01 | 5.76E-01 | 5.12E-04 | 6.11E-05 | 4.28E-03 | 9.67E-03 |
|         | Pred | 0.62             | 0.02               | 0.32               | 0.82               | 2.40E-02   | 5.98E-04 | 1.28E-02 | 4.27E-02 | 4.04E-04 | 1.00E-05 | 2.15E-04 | 7.17E-04 |
| A37A    | Expr | 0.97             | 0.14               | 0.46               | 1                  | 8.86E-02   | 3.70E-03 | 7.09E-02 | 5.76E-01 | 2.59E-03 | 1.08E-04 | 2.07E-03 | 1.68E-02 |
|         | Pred | 0.99             | 0.03               | 0.14               | 1                  | 1.06E-01   | 7.05E-04 | 3.00E-02 | 5.76E-01 | 3.09E-03 | 2.06E-05 | 8.76E-04 | 1.68E-02 |
| A37B    | Expr | 0.82             | 0.21               | 0.72               | 1                  | 4.24E-02   | 5.75E-03 | 3.09E-01 | 5.76E-01 | 1.24E-03 | 1.68E-04 | 9.01E-03 | 1.68E-02 |
|         | Pred | 0.71             | 0.04               | 0.44               | 0.95               | 3.11E-02   | 8.92E-04 | 2.07E-02 | 7.65E-02 | 9.07E-04 | 2.60E-05 | 6.04E-04 | 2.23E-03 |
| L38A    | Expr | 0.98             | 0.26               | 0.89               | 1                  | 9.60E-02   | 7.53E-03 | 3.78E-01 | 5.76E-01 | 2.13E-02 | 1.67E-03 | 8.38E-02 | 1.27E-01 |

| Residue |      | $D_o^i$          |                    |                    |                    | $k_{xc}^i$ |          |          |          | $K_u^i$  |          |          |          |
|---------|------|------------------|--------------------|--------------------|--------------------|------------|----------|----------|----------|----------|----------|----------|----------|
|         |      | DSH <sup>a</sup> | min <sup>b,c</sup> | avg <sup>b,d</sup> | max <sup>b,e</sup> | DSH        | min      | avg      | max      | DSH      | min      | avg      | max      |
| L38B    | Pred | 1                | 0.04               | 0.35               | 1                  | 1.48E-01   | 1.09E-03 | 3.75E-02 | 5.76E-01 | 3.28E-02 | 2.42E-04 | 8.31E-03 | 1.27E-01 |
| L38B    | Expr | 0.94             | 1                  | 1                  | 1                  | 6.85E-02   | 5.76E-01 | 5.76E-01 | 5.76E-01 | 1.52E-02 | 1.27E-01 | 1.27E-01 | 1.27E-01 |
| K40A    | Pred | 0.79             | 0.53               | 0.8                | 0.99               | 3.94E-02   | 1.87E-02 | 4.71E-02 | 1.13E-01 | 8.73E-03 | 4.15E-03 | 1.04E-02 | 2.51E-02 |
| K40A    | Expr | 1                | 0.93               | 1                  | 1                  | 5.76E-01   | 6.73E-02 | 5.51E-01 | 5.76E-01 | 2.49E-02 | 2.91E-03 | 2.38E-02 | 2.49E-02 |
| K40B    | Pred | 0.97             | 0.52               | 0.82               | 1                  | 8.96E-02   | 1.84E-02 | 1.28E-01 | 5.76E-01 | 3.87E-03 | 7.96E-04 | 5.53E-03 | 2.49E-02 |
| K40B    | Expr | 1                | 1                  | 1                  | 1                  | 5.76E-01   | 5.76E-01 | 5.76E-01 | 5.76E-01 | 2.49E-02 | 2.49E-02 | 2.49E-02 | 2.49E-02 |
| Q41A    | Pred | 1                | 0.42               | 0.72               | 1                  | 5.76E-01   | 1.37E-02 | 1.59E-01 | 5.76E-01 | 2.49E-02 | 5.92E-04 | 6.89E-03 | 2.49E-02 |
| Q41A    | Expr | 1                | 0.93               | 1                  | 1                  | 1.62E-01   | 6.73E-02 | 5.51E-01 | 5.76E-01 | 6.25E-03 | 2.59E-03 | 2.12E-02 | 2.22E-02 |
| Q41B    | Pred | 0.73             | 0.87               | 0.99               | 1                  | 3.26E-02   | 5.11E-02 | 5.27E-01 | 5.76E-01 | 1.25E-03 | 1.97E-03 | 2.03E-02 | 2.22E-02 |
| Q41B    | Expr | 1                | 1                  | 1                  | 1                  | 5.76E-01   | 5.76E-01 | 5.76E-01 | 5.76E-01 | 2.22E-02 | 2.22E-02 | 2.22E-02 | 2.22E-02 |
| L42A    | Pred | 1                | 0.52               | 0.71               | 1                  | 5.76E-01   | 1.85E-02 | 8.18E-02 | 5.76E-01 | 2.22E-02 | 7.11E-04 | 3.15E-03 | 2.22E-02 |
| L42A    | Expr | 1                | 0.28               | 0.76               | 1                  | 5.76E-01   | 8.09E-03 | 3.37E-01 | 5.76E-01 | 8.04E-02 | 1.13E-03 | 4.71E-02 | 8.04E-02 |
| L42B    | Pred | 1                | 0.03               | 0.25               | 1                  | 5.76E-01   | 7.56E-04 | 3.36E-02 | 5.76E-01 | 8.04E-02 | 1.06E-04 | 4.70E-03 | 8.04E-02 |
| L42B    | Expr | 0.47             | 0.19               | 0.45               | 1                  | 1.60E-02   | 5.42E-03 | 9.31E-02 | 5.76E-01 | 2.24E-03 | 7.57E-04 | 1.30E-02 | 8.04E-02 |
| N43A    | Pred | 0.17             | 0.03               | 0.11               | 0.36               | 4.72E-03   | 7.15E-04 | 3.07E-03 | 1.13E-02 | 6.60E-04 | 9.99E-05 | 4.29E-04 | 1.58E-03 |
| N43A    | Expr | 0.67             | 0.93               | 1                  | 1                  | 2.80E-02   | 6.73E-02 | 5.51E-01 | 5.76E-01 | 8.57E-04 | 2.06E-03 | 1.69E-02 | 1.76E-02 |
| N43B    | Pred | 0.49             | 0.71               | 0.94               | 1                  | 1.69E-02   | 3.07E-02 | 3.04E-01 | 5.76E-01 | 5.17E-04 | 9.39E-04 | 9.30E-03 | 1.76E-02 |
| N43B    | Expr | 1                | 1                  | 1                  | 1                  | 5.76E-01   | 5.76E-01 | 5.76E-01 | 5.76E-01 | 1.76E-02 | 1.76E-02 | 1.76E-02 | 1.76E-02 |
| L44A    | Pred | 0.87             | 0.52               | 0.85               | 1                  | 5.19E-02   | 1.85E-02 | 1.49E-01 | 5.76E-01 | 1.59E-03 | 5.65E-04 | 4.55E-03 | 1.76E-02 |
| L44A    | Expr | 0.92             | 0.14               | 0.55               | 1                  | 6.38E-02   | 3.63E-03 | 1.74E-01 | 5.76E-01 | 6.77E-03 | 3.85E-04 | 1.85E-02 | 6.10E-02 |
| L44B    | Pred | 0.67             | 0.03               | 0.19               | 0.95               | 2.79E-02   | 6.61E-04 | 9.01E-03 | 7.72E-02 | 2.96E-03 | 7.01E-05 | 9.55E-04 | 8.18E-03 |
| L44B    | Expr | 1                | 1                  | 1                  | 1                  | 5.76E-01   | 5.76E-01 | 5.76E-01 | 5.76E-01 | 6.10E-02 | 6.10E-02 | 6.10E-02 | 6.10E-02 |
| K45A    | Pred | 0.87             | 0.5                | 0.77               | 1                  | 5.06E-02   | 1.72E-02 | 9.24E-02 | 5.76E-01 | 5.36E-03 | 1.82E-03 | 9.80E-03 | 6.10E-02 |
| K45A    | Expr | 0.88             | 0.93               | 1                  | 1                  | 5.27E-02   | 6.73E-02 | 5.51E-01 | 5.76E-01 | 5.46E-03 | 6.97E-03 | 5.71E-02 | 5.96E-02 |
| K45B    | Pred | 0.64             | 0.21               | 0.76               | 1                  | 2.56E-02   | 5.92E-03 | 2.43E-01 | 5.76E-01 | 2.65E-03 | 6.13E-04 | 2.51E-02 | 5.96E-02 |
| K45B    | Expr | 1                | 1                  | 1                  | 1                  | 5.76E-01   | 5.76E-01 | 5.76E-01 | 5.76E-01 | 5.96E-02 | 5.96E-02 | 5.96E-02 | 5.96E-02 |
| L46A    | Pred | 0.97             | 0.38               | 0.67               | 1                  | 9.03E-02   | 1.20E-02 | 1.05E-01 | 5.76E-01 | 9.35E-03 | 1.24E-03 | 1.09E-02 | 5.96E-02 |
| L46A    | Expr | 0.97             | 0.22               | 0.52               | 0.83               | 8.47E-02   | 6.26E-03 | 2.11E-02 | 4.48E-02 | 1.42E-02 | 1.05E-03 | 3.55E-03 | 7.53E-03 |
| L46B    | Pred | 0.97             | 0.03               | 0.16               | 1                  | 9.11E-02   | 7.43E-04 | 3.05E-02 | 5.76E-01 | 1.53E-02 | 1.25E-04 | 5.12E-03 | 9.67E-02 |
| L46B    | Expr | 0.93             | 0.18               | 0.39               | 0.78               | 6.74E-02   | 5.04E-03 | 1.40E-02 | 3.83E-02 | 1.13E-02 | 8.46E-04 | 2.36E-03 | 6.44E-03 |
| L47A    | Pred | 0.66             | 0.02               | 0.1                | 0.55               | 2.73E-02   | 5.79E-04 | 3.11E-03 | 1.97E-02 | 4.58E-03 | 9.72E-05 | 5.22E-04 | 3.32E-03 |
| L47A    | Expr | 0.96             | 0.74               | 0.91               | 0.98               | 8.06E-02   | 3.37E-02 | 6.71E-02 | 9.31E-02 | 2.90E-02 | 1.21E-02 | 2.41E-02 | 3.34E-02 |
| L47B    | Pred | 1                | 0.06               | 0.61               | 1                  | 5.76E-01   | 1.54E-03 | 5.43E-02 | 5.76E-01 | 2.07E-01 | 5.55E-04 | 1.95E-02 | 2.07E-01 |
| L47B    | Expr | 1                | 0.78               | 0.95               | 0.98               | 5.76E-01   | 3.83E-02 | 8.04E-02 | 9.65E-02 | 2.07E-01 | 1.37E-02 | 2.89E-02 | 3.47E-02 |
| D48A    | Pred | 0.87             | 0.66               | 0.92               | 1                  | 5.08E-02   | 2.68E-02 | 2.33E-01 | 5.76E-01 | 1.83E-02 | 9.64E-03 | 8.35E-02 | 2.07E-01 |
| D48A    | Expr | 0.93             | 0.92               | 0.98               | 1                  | 6.63E-02   | 6.17E-02 | 4.11E-01 | 5.76E-01 | 1.24E-02 | 1.16E-02 | 7.73E-02 | 1.08E-01 |
| D48B    | Pred | 1                | 0.73               | 0.98               | 1                  | 5.76E-01   | 3.25E-02 | 4.81E-01 | 5.76E-01 | 1.08E-01 | 6.11E-03 | 9.03E-02 | 1.08E-01 |
| D48B    | Expr | 0.82             | 0.81               | 0.98               | 1                  | 4.32E-02   | 4.15E-02 | 4.34E-01 | 5.76E-01 | 8.12E-03 | 7.79E-03 | 8.15E-02 | 1.08E-01 |
| N49A    | Pred | 1                | 0.93               | 0.99               | 1                  | 5.76E-01   | 6.49E-02 | 3.92E-01 | 5.76E-01 | 1.08E-01 | 1.22E-02 | 7.36E-02 | 1.08E-01 |
| N49A    | Expr | 0.18             | 0.2                | 0.68               | 0.84               | 4.85E-03   | 5.61E-03 | 3.22E-02 | 4.61E-02 | 1.38E-04 | 1.60E-04 | 9.16E-04 | 1.31E-03 |
| N49B    | Pred | 0.04             | 0.05               | 0.36               | 0.75               | 1.04E-03   | 1.20E-03 | 1.27E-02 | 3.46E-02 | 2.97E-05 | 3.42E-05 | 3.60E-04 | 9.84E-04 |
| N49B    | Expr | 0.77             | 0.18               | 0.28               | 0.73               | 3.65E-02   | 4.85E-03 | 8.99E-03 | 3.29E-02 | 1.04E-03 | 1.38E-04 | 2.56E-04 | 9.35E-04 |
|         | Pred | 0.72             | 0.03               | 0.07               | 0.61               | 3.17E-02   | 7.02E-04 | 2.16E-03 | 2.35E-02 | 9.02E-04 | 2.00E-05 | 6.15E-05 | 6.68E-04 |

| Residue |      | $D_o^i$          |                    |                    |                    | $k_{xc}^i$ |          |          |          | $K_u^i$  |          |          |          |
|---------|------|------------------|--------------------|--------------------|--------------------|------------|----------|----------|----------|----------|----------|----------|----------|
|         |      | DSH <sup>a</sup> | min <sup>b,c</sup> | avg <sup>b,d</sup> | max <sup>b,e</sup> | DSH        | min      | avg      | max      | DSH      | min      | avg      | max      |
| W50A    | Expr | 0.85             | 0.16               | 0.4                | 0.77               | 4.76E-02   | 4.35E-03 | 1.53E-02 | 3.72E-02 | 3.41E-03 | 3.12E-04 | 1.10E-03 | 2.67E-03 |
|         | Pred | 0.81             | 0.03               | 0.15               | 0.54               | 4.12E-02   | 7.10E-04 | 4.62E-03 | 1.94E-02 | 2.95E-03 | 5.09E-05 | 3.31E-04 | 1.39E-03 |
| W50B    | Expr | 0.64             | 0.71               | 0.78               | 0.85               | 2.58E-02   | 3.07E-02 | 3.81E-02 | 4.74E-02 | 1.85E-03 | 2.20E-03 | 2.73E-03 | 3.40E-03 |
|         | Pred | 0.57             | 0.13               | 0.36               | 0.79               | 2.10E-02   | 3.60E-03 | 1.32E-02 | 3.93E-02 | 1.50E-03 | 2.58E-04 | 9.44E-04 | 2.82E-03 |
| E62A    | Expr | 0.87             | 1                  | 1                  | 1                  | 5.07E-02   | 5.76E-01 | 5.76E-01 | 5.76E-01 | 5.73E-03 | 6.50E-02 | 6.50E-02 | 6.50E-02 |
|         | Pred | 0.98             | 0.58               | 0.88               | 1                  | 9.74E-02   | 2.15E-02 | 2.77E-01 | 5.76E-01 | 1.10E-02 | 2.43E-03 | 3.13E-02 | 6.50E-02 |
| E62B    | Expr | 0.62             | 0.63               | 0.97               | 1                  | 2.42E-02   | 2.47E-02 | 4.99E-01 | 5.76E-01 | 2.73E-03 | 2.79E-03 | 5.64E-02 | 6.50E-02 |
|         | Pred | 0.69             | 0.55               | 0.87               | 1                  | 2.95E-02   | 2.00E-02 | 1.53E-01 | 5.76E-01 | 3.33E-03 | 2.26E-03 | 1.73E-02 | 6.50E-02 |
| Q63A    | Expr | 0.52             | 0.11               | 0.91               | 1                  | 1.82E-02   | 3.00E-03 | 4.97E-01 | 5.76E-01 | 1.30E-03 | 2.15E-04 | 3.55E-02 | 4.11E-02 |
|         | Pred | 0.58             | 0.03               | 0.64               | 1                  | 2.19E-02   | 7.48E-04 | 5.80E-02 | 5.76E-01 | 1.56E-03 | 5.34E-05 | 4.14E-03 | 4.11E-02 |
| Q63B    | Expr | 0.64             | 0.6                | 0.93               | 1                  | 2.57E-02   | 2.29E-02 | 3.75E-01 | 5.76E-01 | 1.83E-03 | 1.64E-03 | 2.68E-02 | 4.11E-02 |
|         | Pred | 0.72             | 0.28               | 0.66               | 1                  | 3.16E-02   | 8.29E-03 | 5.64E-02 | 5.76E-01 | 2.26E-03 | 5.93E-04 | 4.03E-03 | 4.11E-02 |
| L64A    | Expr | 0.52             | 0.03               | 0.07               | 0.2                | 1.82E-02   | 7.00E-04 | 1.93E-03 | 5.56E-03 | 2.55E-03 | 9.78E-05 | 2.69E-04 | 7.77E-04 |
|         | Pred | 0.56             | 0.03               | 0.04               | 0.05               | 2.04E-02   | 6.72E-04 | 9.22E-04 | 1.17E-03 | 2.85E-03 | 9.40E-05 | 1.29E-04 | 1.64E-04 |
| L64B    | Expr | 0.21             | 0.03               | 0.16               | 0.62               | 5.77E-03   | 8.34E-04 | 4.90E-03 | 2.42E-02 | 8.06E-04 | 1.17E-04 | 6.85E-04 | 3.38E-03 |
|         | Pred | 0.22             | 0.03               | 0.12               | 0.44               | 6.14E-03   | 7.95E-04 | 3.58E-03 | 1.45E-02 | 8.59E-04 | 1.11E-04 | 5.00E-04 | 2.03E-03 |
| G65A    | Expr | 0.85             | 0.05               | 0.51               | 1                  | 4.68E-02   | 1.38E-03 | 2.24E-01 | 5.76E-01 | 2.38E-03 | 6.98E-05 | 1.13E-02 | 2.92E-02 |
|         | Pred | 0.95             | 0.03               | 0.25               | 0.87               | 7.75E-02   | 7.64E-04 | 9.19E-03 | 5.18E-02 | 3.93E-03 | 3.87E-05 | 4.66E-04 | 2.63E-03 |
| G65B    | Expr | 0.89             | 0.05               | 0.4                | 1                  | 5.61E-02   | 1.37E-03 | 4.10E-02 | 5.76E-01 | 2.85E-03 | 6.95E-05 | 2.08E-03 | 2.92E-02 |
|         | Pred | 1                | 0.03               | 0.27               | 0.8                | 5.76E-01   | 7.97E-04 | 9.13E-03 | 4.03E-02 | 2.92E-02 | 4.04E-05 | 4.63E-04 | 2.04E-03 |
| V67A    | Expr | 0.67             | 0.06               | 0.66               | 1                  | 2.74E-02   | 1.60E-03 | 2.81E-01 | 5.76E-01 | 1.39E-02 | 8.14E-04 | 1.43E-01 | 2.92E-01 |
|         | Pred | 0.73             | 0.03               | 0.38               | 0.77               | 3.23E-02   | 8.34E-04 | 1.42E-02 | 3.73E-02 | 1.64E-02 | 4.23E-04 | 7.23E-03 | 1.89E-02 |
| V67B    | Expr | 0.79             | 0.31               | 0.9                | 1                  | 3.89E-02   | 9.32E-03 | 4.22E-01 | 5.76E-01 | 1.98E-02 | 4.73E-03 | 2.14E-01 | 2.92E-01 |
|         | Pred | 0.88             | 0.2                | 0.73               | 1                  | 5.32E-02   | 5.62E-03 | 6.63E-02 | 5.76E-01 | 2.70E-02 | 2.85E-03 | 3.37E-02 | 2.92E-01 |
| T68A    | Expr | 0.13             | 0.03               | 0.07               | 0.16               | 3.51E-03   | 7.02E-04 | 1.89E-03 | 4.41E-03 | 3.31E-04 | 6.63E-05 | 1.79E-04 | 4.16E-04 |
|         | Pred | 0.14             | 0.03               | 0.04               | 0.07               | 3.63E-03   | 6.75E-04 | 9.75E-04 | 1.73E-03 | 3.43E-04 | 6.37E-05 | 9.21E-05 | 1.63E-04 |
| T68B    | Expr | 0.34             | 0.04               | 0.12               | 0.45               | 1.05E-02   | 9.39E-04 | 3.44E-03 | 1.51E-02 | 9.90E-04 | 8.88E-05 | 3.25E-04 | 1.42E-03 |
|         | Pred | 0.36             | 0.03               | 0.1                | 0.45               | 1.13E-02   | 8.40E-04 | 3.08E-03 | 1.51E-02 | 1.07E-03 | 7.93E-05 | 2.91E-04 | 1.43E-03 |
| Q69A    | Expr | 0.89             | 0.14               | 0.81               | 1                  | 5.44E-02   | 3.70E-03 | 2.94E-01 | 5.76E-01 | 1.74E-03 | 1.18E-04 | 9.43E-03 | 1.84E-02 |
|         | Pred | 1                | 0.05               | 0.3                | 0.65               | 5.76E-01   | 1.26E-03 | 1.01E-02 | 2.65E-02 | 1.84E-02 | 4.02E-05 | 3.22E-04 | 8.49E-04 |
| Q69B    | Expr | 0.89             | 0.15               | 0.78               | 1                  | 5.61E-02   | 3.96E-03 | 2.14E-01 | 5.76E-01 | 1.80E-03 | 1.27E-04 | 6.86E-03 | 1.84E-02 |
|         | Pred | 1                | 0.04               | 0.5                | 0.89               | 5.76E-01   | 1.14E-03 | 2.02E-02 | 5.48E-02 | 1.84E-02 | 3.66E-05 | 6.46E-04 | 1.76E-03 |
| E70A    | Expr | 0.68             | 0.97               | 1                  | 1                  | 2.87E-02   | 8.78E-02 | 5.52E-01 | 5.76E-01 | 3.40E-03 | 1.04E-02 | 6.54E-02 | 6.81E-02 |
|         | Pred | 0.77             | 0.39               | 0.74               | 1                  | 3.68E-02   | 1.23E-02 | 6.37E-02 | 5.76E-01 | 4.35E-03 | 1.45E-03 | 7.54E-03 | 6.81E-02 |
| E70B    | Expr | 0.59             | 0.55               | 0.98               | 1                  | 2.20E-02   | 2.01E-02 | 5.04E-01 | 5.76E-01 | 2.60E-03 | 2.37E-03 | 5.96E-02 | 6.81E-02 |
|         | Pred | 0.65             | 0.53               | 0.86               | 1                  | 2.66E-02   | 1.89E-02 | 2.48E-01 | 5.76E-01 | 3.14E-03 | 2.24E-03 | 2.94E-02 | 6.81E-02 |
| F71A    | Expr | 0.24             | 0.05               | 0.26               | 1                  | 6.94E-03   | 1.31E-03 | 3.58E-02 | 5.76E-01 | 9.90E-04 | 1.87E-04 | 5.10E-03 | 8.21E-02 |
|         | Pred | 0.25             | 0.03               | 0.1                | 0.28               | 7.17E-03   | 8.82E-04 | 2.69E-03 | 8.11E-03 | 1.02E-03 | 1.26E-04 | 3.84E-04 | 1.16E-03 |
| F71B    | Expr | 0.38             | 0.04               | 0.11               | 0.51               | 1.21E-02   | 9.20E-04 | 3.27E-03 | 1.80E-02 | 1.73E-03 | 1.31E-04 | 4.66E-04 | 2.57E-03 |
|         | Pred | 0.4              | 0.03               | 0.1                | 0.53               | 1.28E-02   | 8.22E-04 | 2.87E-03 | 1.90E-02 | 1.83E-03 | 1.17E-04 | 4.09E-04 | 2.71E-03 |
| W72A    | Expr | 0.07             | 0.02               | 0.07               | 0.21               | 1.94E-03   | 6.31E-04 | 1.75E-03 | 6.01E-03 | 2.53E-04 | 8.23E-05 | 2.28E-04 | 7.84E-04 |
|         | Pred | 0.08             | 0.03               | 0.07               | 0.22               | 2.02E-03   | 6.39E-04 | 1.83E-03 | 6.27E-03 | 2.63E-04 | 8.33E-05 | 2.38E-04 | 8.18E-04 |
| W72B    | Expr | 0.05             | 0.05               | 0.28               | 0.42               | 1.26E-03   | 1.26E-03 | 8.45E-03 | 1.36E-02 | 1.65E-04 | 1.65E-04 | 1.10E-03 | 1.77E-03 |

| Residue |      | $D_o^i$          |                    |                    |                    | $k_{xc}^i$ |          |          |          | $K_u^i$  |          |          |          |
|---------|------|------------------|--------------------|--------------------|--------------------|------------|----------|----------|----------|----------|----------|----------|----------|
|         |      | DSH <sup>a</sup> | min <sup>b,c</sup> | avg <sup>b,d</sup> | max <sup>b,e</sup> | DSH        | min      | avg      | max      | DSH      | min      | avg      | max      |
| D73A    | Pred | 0.05             | 0.05               | 0.38               | 0.82               | 1.28E-03   | 1.28E-03 | 1.33E-02 | 4.25E-02 | 1.67E-04 | 1.67E-04 | 1.73E-03 | 5.54E-03 |
|         | Expr | 0.7              | 0.21               | 0.48               | 0.83               | 2.99E-02   | 5.75E-03 | 1.72E-02 | 4.41E-02 | 4.46E-03 | 8.58E-04 | 2.56E-03 | 6.58E-03 |
|         | Pred | 0.99             | 0.21               | 0.61               | 1                  | 1.07E-01   | 5.96E-03 | 3.13E-02 | 1.42E-01 | 1.59E-02 | 8.89E-04 | 4.68E-03 | 2.12E-02 |
| D73B    | Expr | 0.49             | 0.36               | 0.51               | 0.71               | 1.68E-02   | 1.12E-02 | 1.85E-02 | 3.07E-02 | 2.51E-03 | 1.68E-03 | 2.76E-03 | 4.58E-03 |
|         | Pred | 0.66             | 0.62               | 0.97               | 1                  | 2.71E-02   | 2.42E-02 | 5.00E-01 | 5.76E-01 | 4.04E-03 | 3.61E-03 | 7.46E-02 | 8.59E-02 |
| N74A    | Expr | 0.43             | 0.33               | 0.51               | 0.76               | 1.39E-02   | 9.84E-03 | 1.84E-02 | 3.55E-02 | 3.95E-04 | 2.80E-04 | 5.25E-04 | 1.01E-03 |
|         | Pred | 0.51             | 0.35               | 0.71               | 1                  | 1.77E-02   | 1.06E-02 | 8.39E-02 | 5.76E-01 | 5.04E-04 | 3.02E-04 | 2.39E-03 | 1.64E-02 |
| N74B    | Expr | 0.71             | 0.2                | 0.37               | 0.57               | 3.08E-02   | 5.73E-03 | 1.20E-02 | 2.13E-02 | 8.77E-04 | 1.63E-04 | 3.41E-04 | 6.07E-04 |
|         | Pred | 1                | 0.27               | 0.7                | 1                  | 5.76E-01   | 7.92E-03 | 1.60E-01 | 5.76E-01 | 1.64E-02 | 2.26E-04 | 4.56E-03 | 1.64E-02 |
| L75A    | Expr | 0.04             | 0.03               | 0.1                | 0.29               | 1.09E-03   | 7.42E-04 | 2.85E-03 | 8.58E-03 | 1.16E-04 | 7.87E-05 | 3.02E-04 | 9.09E-04 |
|         | Pred | 0.04             | 0.03               | 0.12               | 0.37               | 1.11E-03   | 7.49E-04 | 3.41E-03 | 1.15E-02 | 1.18E-04 | 7.94E-05 | 3.61E-04 | 1.22E-03 |
| L75B    | Expr | 0.1              | 0.03               | 0.06               | 0.3                | 2.77E-03   | 6.43E-04 | 1.52E-03 | 8.91E-03 | 2.94E-04 | 6.81E-05 | 1.61E-04 | 9.45E-04 |
|         | Pred | 0.11             | 0.03               | 0.06               | 0.35               | 3.04E-03   | 6.59E-04 | 1.67E-03 | 1.08E-02 | 3.23E-04 | 6.98E-05 | 1.77E-04 | 1.15E-03 |
| E76A    | Expr | 0.36             | 0.29               | 0.45               | 0.69               | 1.13E-02   | 8.73E-03 | 1.56E-02 | 2.90E-02 | 3.43E-03 | 2.66E-03 | 4.75E-03 | 8.82E-03 |
|         | Pred | 0.41             | 0.27               | 0.57               | 0.85               | 1.34E-02   | 7.73E-03 | 2.30E-02 | 4.68E-02 | 4.06E-03 | 2.35E-03 | 6.98E-03 | 1.42E-02 |
| E76B    | Expr | 0.25             | 0.14               | 0.38               | 0.59               | 7.23E-03   | 3.77E-03 | 1.23E-02 | 2.24E-02 | 2.20E-03 | 1.15E-03 | 3.75E-03 | 6.81E-03 |
|         | Pred | 0.27             | 0.15               | 0.61               | 1                  | 7.98E-03   | 3.95E-03 | 5.12E-02 | 5.76E-01 | 2.43E-03 | 1.20E-03 | 1.56E-02 | 1.75E-01 |
| K77A    | Expr | 0.87             | 0.61               | 0.88               | 1                  | 5.08E-02   | 2.33E-02 | 8.12E-02 | 5.76E-01 | 4.57E-03 | 2.09E-03 | 7.31E-03 | 5.18E-02 |
|         | Pred | 1                | 0.63               | 0.87               | 1                  | 5.76E-01   | 2.46E-02 | 1.32E-01 | 5.76E-01 | 5.18E-02 | 2.21E-03 | 1.19E-02 | 5.18E-02 |
| K77B    | Expr | 0.56             | 0.64               | 0.95               | 1                  | 2.06E-02   | 2.56E-02 | 3.14E-01 | 5.76E-01 | 1.86E-03 | 2.30E-03 | 2.83E-02 | 5.18E-02 |
|         | Pred | 0.69             | 0.71               | 0.93               | 1                  | 2.96E-02   | 3.09E-02 | 3.50E-01 | 5.76E-01 | 2.66E-03 | 2.78E-03 | 3.15E-02 | 5.18E-02 |
| E78A    | Expr | 0.27             | 0.5                | 0.79               | 0.95               | 7.77E-03   | 1.74E-02 | 4.42E-02 | 7.51E-02 | 1.10E-03 | 2.48E-03 | 6.29E-03 | 1.07E-02 |
|         | Pred | 0.27             | 0.44               | 0.75               | 1                  | 8.00E-03   | 1.45E-02 | 1.17E-01 | 5.76E-01 | 1.14E-03 | 2.06E-03 | 1.67E-02 | 8.19E-02 |
| E78B    | Expr | 0.68             | 0.54               | 0.88               | 1                  | 2.87E-02   | 1.92E-02 | 1.57E-01 | 5.76E-01 | 4.08E-03 | 2.73E-03 | 2.23E-02 | 8.19E-02 |
|         | Pred | 0.83             | 0.53               | 0.79               | 1                  | 4.45E-02   | 1.89E-02 | 1.66E-01 | 5.76E-01 | 6.33E-03 | 2.69E-03 | 2.36E-02 | 8.19E-02 |
| T79A    | Expr | 0.33             | 0.03               | 0.18               | 0.67               | 9.84E-03   | 7.69E-04 | 5.77E-03 | 2.81E-02 | 9.49E-04 | 7.42E-05 | 5.56E-04 | 2.71E-03 |
|         | Pred | 0.34             | 0.03               | 0.18               | 0.69               | 1.02E-02   | 7.66E-04 | 5.73E-03 | 2.93E-02 | 9.87E-04 | 7.38E-05 | 5.52E-04 | 2.82E-03 |
| T79B    | Expr | 0.44             | 0.03               | 0.09               | 0.7                | 1.46E-02   | 6.56E-04 | 2.92E-03 | 3.03E-02 | 1.41E-03 | 6.32E-05 | 2.82E-04 | 2.92E-03 |
|         | Pred | 0.52             | 0.03               | 0.09               | 0.81               | 1.83E-02   | 6.39E-04 | 3.33E-03 | 4.14E-02 | 1.77E-03 | 6.16E-05 | 3.21E-04 | 3.99E-03 |
| E80A    | Expr | 0.53             | 0.5                | 0.91               | 1                  | 1.89E-02   | 1.71E-02 | 1.12E-01 | 5.76E-01 | 2.23E-03 | 2.02E-03 | 1.33E-02 | 6.81E-02 |
|         | Pred | 0.57             | 0.49               | 0.94               | 1                  | 2.13E-02   | 1.67E-02 | 4.03E-01 | 5.76E-01 | 2.52E-03 | 1.98E-03 | 4.77E-02 | 6.81E-02 |
| E80B    | Expr | 0.64             | 0.42               | 0.69               | 0.93               | 2.53E-02   | 1.38E-02 | 3.16E-02 | 6.49E-02 | 2.99E-03 | 1.63E-03 | 3.74E-03 | 7.68E-03 |
|         | Pred | 0.79             | 0.23               | 0.54               | 0.8                | 3.86E-02   | 6.63E-03 | 2.10E-02 | 3.99E-02 | 4.56E-03 | 7.84E-04 | 2.49E-03 | 4.72E-03 |
| G81A    | Expr | 0.83             | 0.57               | 0.89               | 1                  | 4.37E-02   | 2.13E-02 | 1.09E-01 | 5.76E-01 | 1.92E-03 | 9.37E-04 | 4.78E-03 | 2.54E-02 |
|         | Pred | 0.9              | 0.56               | 0.91               | 1                  | 5.67E-02   | 2.08E-02 | 2.56E-01 | 5.76E-01 | 2.50E-03 | 9.16E-04 | 1.13E-02 | 2.54E-02 |
| G81B    | Expr | 0.61             | 0.44               | 0.78               | 0.99               | 2.38E-02   | 1.43E-02 | 4.56E-02 | 1.13E-01 | 1.05E-03 | 6.32E-04 | 2.01E-03 | 4.98E-03 |
|         | Pred | 0.73             | 0.4                | 0.64               | 1                  | 3.28E-02   | 1.29E-02 | 5.28E-02 | 5.76E-01 | 1.45E-03 | 5.70E-04 | 2.33E-03 | 2.54E-02 |
| L82A    | Expr | 0.36             | 0.03               | 0.18               | 0.36               | 1.11E-02   | 6.52E-04 | 5.34E-03 | 1.12E-02 | 1.66E-03 | 9.76E-05 | 8.00E-04 | 1.67E-03 |
|         | Pred | 0.38             | 0.03               | 0.17               | 0.37               | 1.19E-02   | 6.52E-04 | 5.09E-03 | 1.14E-02 | 1.77E-03 | 9.77E-05 | 7.62E-04 | 1.71E-03 |
| L82B    | Expr | 0.6              | 0.04               | 0.12               | 0.7                | 2.32E-02   | 9.74E-04 | 3.91E-03 | 3.00E-02 | 3.47E-03 | 1.46E-04 | 5.85E-04 | 4.50E-03 |
|         | Pred | 0.74             | 0.03               | 0.12               | 0.79               | 3.41E-02   | 8.56E-04 | 4.36E-03 | 3.93E-02 | 5.10E-03 | 1.28E-04 | 6.53E-04 | 5.89E-03 |
| R83A    | Expr | 0.65             | 0.03               | 0.31               | 0.73               | 2.64E-02   | 7.37E-04 | 1.04E-02 | 3.29E-02 | 2.07E-03 | 5.79E-05 | 8.19E-04 | 2.59E-03 |
|         | Pred | 0.7              | 0.03               | 0.3                | 0.72               | 3.05E-02   | 7.27E-04 | 9.99E-03 | 3.18E-02 | 2.40E-03 | 5.71E-05 | 7.85E-04 | 2.50E-03 |

| Residue |      | $D_o^i$          |                    |                    |                    | $k_{xc}^i$ |          |          |          | $K_u^i$  |          |          |          |
|---------|------|------------------|--------------------|--------------------|--------------------|------------|----------|----------|----------|----------|----------|----------|----------|
|         |      | DSH <sup>a</sup> | min <sup>b,c</sup> | avg <sup>b,d</sup> | max <sup>b,e</sup> | DSH        | min      | avg      | max      | DSH      | min      | avg      | max      |
| R83B    | Expr | 0.66             | 0.03               | 0.29               | 0.84               | 2.67E-02   | 8.59E-04 | 9.66E-03 | 4.52E-02 | 2.10E-03 | 6.75E-05 | 7.59E-04 | 3.55E-03 |
|         | Pred | 0.81             | 0.03               | 0.24               | 1                  | 4.16E-02   | 7.39E-04 | 3.31E-02 | 5.76E-01 | 3.27E-03 | 5.81E-05 | 2.60E-03 | 4.52E-02 |
| Q84A    | Expr | 0.85             | 0.82               | 0.94               | 1                  | 4.80E-02   | 4.27E-02 | 2.38E-01 | 5.76E-01 | 1.47E-03 | 1.30E-03 | 7.27E-03 | 1.76E-02 |
|         | Pred | 0.74             | 0.48               | 0.8                | 1                  | 3.40E-02   | 1.65E-02 | 9.67E-02 | 5.76E-01 | 1.04E-03 | 5.03E-04 | 2.96E-03 | 1.76E-02 |
| Q84B    | Expr | 0.82             | 0.73               | 0.95               | 1                  | 4.34E-02   | 3.32E-02 | 2.69E-01 | 5.76E-01 | 1.33E-03 | 1.01E-03 | 8.21E-03 | 1.76E-02 |
|         | Pred | 0.82             | 0.62               | 0.79               | 1                  | 4.31E-02   | 2.41E-02 | 1.17E-01 | 5.76E-01 | 1.32E-03 | 7.38E-04 | 3.56E-03 | 1.76E-02 |
| E85A    | Expr | 0.7              | 0.56               | 0.87               | 1                  | 3.00E-02   | 2.05E-02 | 1.04E-01 | 5.76E-01 | 3.55E-03 | 2.42E-03 | 1.23E-02 | 6.81E-02 |
|         | Pred | 0.54             | 0.45               | 0.69               | 0.97               | 1.93E-02   | 1.48E-02 | 3.19E-02 | 8.47E-02 | 2.29E-03 | 1.75E-03 | 3.77E-03 | 1.00E-02 |
| E85B    | Expr | 0.75             | 0.66               | 0.9                | 1                  | 3.42E-02   | 2.73E-02 | 1.39E-01 | 5.76E-01 | 4.04E-03 | 3.23E-03 | 1.64E-02 | 6.81E-02 |
|         | Pred | 0.69             | 0.27               | 0.7                | 0.97               | 2.92E-02   | 7.77E-03 | 3.68E-02 | 8.68E-02 | 3.46E-03 | 9.19E-04 | 4.36E-03 | 1.03E-02 |
| M86A    | Expr | 0.5              | 0.03               | 0.09               | 0.56               | 1.71E-02   | 7.67E-04 | 2.68E-03 | 2.05E-02 | 1.44E-03 | 6.44E-05 | 2.25E-04 | 1.72E-03 |
|         | Pred | 0.41             | 0.03               | 0.06               | 0.43               | 1.32E-02   | 7.42E-04 | 1.83E-03 | 1.42E-02 | 1.11E-03 | 6.23E-05 | 1.53E-04 | 1.20E-03 |
| M86B    | Expr | 0.75             | 0.03               | 0.09               | 0.7                | 3.42E-02   | 7.11E-04 | 3.02E-03 | 3.04E-02 | 2.87E-03 | 5.97E-05 | 2.54E-04 | 2.56E-03 |
|         | Pred | 0.69             | 0.03               | 0.07               | 0.6                | 2.91E-02   | 6.96E-04 | 2.29E-03 | 2.28E-02 | 2.44E-03 | 5.84E-05 | 1.92E-04 | 1.91E-03 |
| S87A    | Expr | 0.85             | 0.09               | 0.67               | 0.89               | 4.79E-02   | 2.35E-03 | 3.36E-02 | 5.51E-02 | 9.25E-04 | 4.54E-05 | 6.48E-04 | 1.06E-03 |
|         | Pred | 1                | 0.04               | 0.59               | 1                  | 5.76E-01   | 1.04E-03 | 5.17E-02 | 5.76E-01 | 1.11E-02 | 2.00E-05 | 9.98E-04 | 1.11E-02 |
| S87B    | Expr | 0.02             | 0.05               | 0.57               | 0.9                | 4.75E-04   | 1.32E-03 | 2.53E-02 | 5.64E-02 | 9.16E-06 | 2.55E-05 | 4.88E-04 | 1.09E-03 |
|         | Pred | 0.02             | 0.03               | 0.54               | 0.98               | 4.72E-04   | 8.49E-04 | 2.76E-02 | 9.29E-02 | 9.11E-06 | 1.64E-05 | 5.33E-04 | 1.79E-03 |
| K88A    | Expr | 0.77             | 0.59               | 0.83               | 1                  | 3.68E-02   | 2.25E-02 | 7.03E-02 | 5.76E-01 | 1.18E-03 | 7.20E-04 | 2.25E-03 | 1.84E-02 |
|         | Pred | 0.82             | 0.43               | 0.74               | 0.95               | 4.32E-02   | 1.42E-02 | 3.78E-02 | 7.65E-02 | 1.38E-03 | 4.54E-04 | 1.21E-03 | 2.45E-03 |
| K88B    | Expr | 0.48             | 0.39               | 0.81               | 0.92               | 1.62E-02   | 1.22E-02 | 4.49E-02 | 6.39E-02 | 5.19E-04 | 3.91E-04 | 1.44E-03 | 2.05E-03 |
|         | Pred | 0.43             | 0.25               | 0.82               | 1                  | 1.39E-02   | 7.09E-03 | 1.02E-01 | 5.76E-01 | 4.47E-04 | 2.27E-04 | 3.28E-03 | 1.84E-02 |
| D89A    | Expr | 0.05             | 0.05               | 0.45               | 0.8                | 1.29E-03   | 1.31E-03 | 1.73E-02 | 3.99E-02 | 1.13E-04 | 1.15E-04 | 1.52E-03 | 3.50E-03 |
|         | Pred | 0.05             | 0.04               | 0.37               | 0.75               | 1.28E-03   | 1.11E-03 | 1.35E-02 | 3.51E-02 | 1.13E-04 | 9.79E-05 | 1.18E-03 | 3.08E-03 |
| D89B    | Expr | 0.8              | 0.79               | 0.89               | 1                  | 4.06E-02   | 3.84E-02 | 7.96E-02 | 5.76E-01 | 3.56E-03 | 3.38E-03 | 6.99E-03 | 5.06E-02 |
|         | Pred | 0.75             | 0.61               | 0.97               | 1                  | 3.42E-02   | 2.35E-02 | 4.57E-01 | 5.76E-01 | 3.01E-03 | 2.06E-03 | 4.01E-02 | 5.06E-02 |
| L90A    | Expr | 0.61             | 0.03               | 0.15               | 0.69               | 2.34E-02   | 6.79E-04 | 5.07E-03 | 2.91E-02 | 7.81E-03 | 2.27E-04 | 1.69E-03 | 9.74E-03 |
|         | Pred | 0.75             | 0.03               | 0.16               | 0.79               | 3.48E-02   | 6.85E-04 | 5.75E-03 | 3.85E-02 | 1.16E-02 | 2.29E-04 | 1.92E-03 | 1.29E-02 |
| L90B    | Expr | 0.26             | 0.03               | 0.16               | 0.63               | 7.49E-03   | 7.30E-04 | 4.94E-03 | 2.50E-02 | 2.51E-03 | 2.44E-04 | 1.65E-03 | 8.36E-03 |
|         | Pred | 0.28             | 0.03               | 0.17               | 0.74               | 8.35E-03   | 7.33E-04 | 5.89E-03 | 3.34E-02 | 2.79E-03 | 2.45E-04 | 1.97E-03 | 1.12E-02 |
| E91A    | Expr | 0.78             | 0.45               | 0.62               | 0.77               | 3.77E-02   | 1.48E-02 | 2.48E-02 | 3.66E-02 | 1.15E-02 | 4.50E-03 | 7.54E-03 | 1.11E-02 |
|         | Pred | 1                | 0.18               | 0.72               | 1                  | 5.76E-01   | 4.87E-03 | 8.60E-02 | 5.76E-01 | 1.75E-01 | 1.48E-03 | 2.62E-02 | 1.75E-01 |
| E91B    | Expr | 0.74             | 0.33               | 0.62               | 0.77               | 3.37E-02   | 1.01E-02 | 2.55E-02 | 3.67E-02 | 1.03E-02 | 3.07E-03 | 7.76E-03 | 1.12E-02 |
|         | Pred | 1                | 0.35               | 0.76               | 1                  | 5.76E-01   | 1.07E-02 | 1.38E-01 | 5.76E-01 | 1.75E-01 | 3.26E-03 | 4.20E-02 | 1.75E-01 |
| E92A    | Expr | 0.04             | 0.03               | 0.47               | 0.72               | 9.05E-04   | 8.41E-04 | 1.70E-02 | 3.16E-02 | 2.39E-04 | 2.22E-04 | 4.49E-03 | 8.34E-03 |
|         | Pred | 0.04             | 0.03               | 0.69               | 0.98               | 9.13E-04   | 8.21E-04 | 3.74E-02 | 9.75E-02 | 2.41E-04 | 2.17E-04 | 9.87E-03 | 2.57E-02 |
| E92B    | Expr | 0.45             | 0.41               | 0.54               | 0.66               | 1.50E-02   | 1.30E-02 | 1.97E-02 | 2.72E-02 | 3.95E-03 | 3.44E-03 | 5.20E-03 | 7.20E-03 |
|         | Pred | 0.59             | 0.56               | 0.85               | 1                  | 2.22E-02   | 2.08E-02 | 1.97E-01 | 5.76E-01 | 5.85E-03 | 5.49E-03 | 5.21E-02 | 1.52E-01 |
| V93A    | Expr | 0.03             | 0.03               | 0.09               | 0.39               | 7.57E-04   | 7.20E-04 | 2.55E-03 | 1.23E-02 | 3.11E-04 | 2.96E-04 | 1.05E-03 | 5.05E-03 |
|         | Pred | 0.03             | 0.03               | 0.11               | 0.56               | 7.69E-04   | 7.37E-04 | 3.43E-03 | 2.05E-02 | 3.16E-04 | 3.03E-04 | 1.41E-03 | 8.44E-03 |
| V93B    | Expr | 0.03             | 0.03               | 0.22               | 0.47               | 7.45E-04   | 7.27E-04 | 6.76E-03 | 1.57E-02 | 3.06E-04 | 2.99E-04 | 2.78E-03 | 6.46E-03 |
|         | Pred | 0.03             | 0.03               | 0.27               | 0.67               | 7.57E-04   | 7.36E-04 | 9.17E-03 | 2.77E-02 | 3.11E-04 | 3.03E-04 | 3.77E-03 | 1.14E-02 |
| K94A    | Expr | 0.61             | 0.08               | 0.27               | 0.51               | 2.33E-02   | 2.00E-03 | 8.01E-03 | 1.78E-02 | 2.06E-03 | 1.77E-04 | 7.06E-04 | 1.57E-03 |

| Residue |      | DSH <sup>a</sup> | $D_o^i$            |                    | DSH  | $k_{xc}^i$         |          | DSH      | $K_u^i$  |          | min      | avg      | max      |
|---------|------|------------------|--------------------|--------------------|------|--------------------|----------|----------|----------|----------|----------|----------|----------|
|         |      |                  | min <sup>b,c</sup> | avg <sup>b,d</sup> |      | max <sup>b,e</sup> | min      |          | avg      | max      |          |          |          |
| K94B    | Pred | 0.8              | 0.08               | 0.34               | 0.76 | 4.05E-02           | 2.09E-03 | 1.13E-02 | 3.55E-02 | 3.57E-03 | 1.84E-04 | 9.98E-04 | 3.13E-03 |
|         | Expr | 0.59             | 0.02               | 0.23               | 0.6  | 2.22E-02           | 6.22E-04 | 7.29E-03 | 2.29E-02 | 1.96E-03 | 5.49E-05 | 6.42E-04 | 2.02E-03 |
| A95A    | Pred | 0.85             | 0.02               | 0.29               | 0.81 | 4.79E-02           | 6.29E-04 | 1.01E-02 | 4.19E-02 | 4.23E-03 | 5.55E-05 | 8.92E-04 | 3.69E-03 |
|         | Expr | 0.67             | 0.4                | 0.55               | 0.67 | 2.80E-02           | 1.27E-02 | 2.05E-02 | 2.78E-02 | 1.24E-03 | 5.59E-04 | 9.05E-04 | 1.23E-03 |
| A95B    | Pred | 0.97             | 0.63               | 0.88               | 1    | 8.58E-02           | 2.47E-02 | 2.02E-01 | 5.76E-01 | 3.79E-03 | 1.09E-03 | 8.95E-03 | 2.54E-02 |
|         | Expr | 0.51             | 0.34               | 0.5                | 0.63 | 1.78E-02           | 1.05E-02 | 1.77E-02 | 2.52E-02 | 7.89E-04 | 4.65E-04 | 7.81E-04 | 1.11E-03 |
| K96A    | Pred | 0.75             | 0.45               | 0.75               | 1    | 3.44E-02           | 1.49E-02 | 8.68E-02 | 5.76E-01 | 1.52E-03 | 6.58E-04 | 3.84E-03 | 2.54E-02 |
|         | Expr | 0.13             | 0.14               | 0.45               | 0.67 | 3.36E-03           | 3.73E-03 | 1.59E-02 | 2.78E-02 | 2.15E-04 | 2.38E-04 | 1.02E-03 | 1.78E-03 |
| K96B    | Pred | 0.14             | 0.15               | 0.69               | 1    | 3.69E-03           | 4.07E-03 | 1.61E-01 | 5.76E-01 | 2.36E-04 | 2.60E-04 | 1.03E-02 | 3.68E-02 |
|         | Expr | 0.22             | 0.17               | 0.49               | 0.59 | 6.28E-03           | 4.66E-03 | 1.70E-02 | 2.25E-02 | 4.01E-04 | 2.98E-04 | 1.09E-03 | 1.43E-03 |
| V97A    | Pred | 0.26             | 0.19               | 0.72               | 1    | 7.56E-03           | 5.30E-03 | 6.02E-02 | 5.76E-01 | 4.83E-04 | 3.39E-04 | 3.85E-03 | 3.68E-02 |
|         | Expr | 0.17             | 0.03               | 0.06               | 0.2  | 4.73E-03           | 6.42E-04 | 1.46E-03 | 5.59E-03 | 1.05E-03 | 1.42E-04 | 3.23E-04 | 1.24E-03 |
| V97B    | Pred | 0.19             | 0.03               | 0.06               | 0.22 | 5.27E-03           | 6.55E-04 | 1.54E-03 | 6.23E-03 | 1.17E-03 | 1.45E-04 | 3.40E-04 | 1.38E-03 |
|         | Expr | 0.05             | 0.03               | 0.05               | 0.26 | 1.18E-03           | 6.38E-04 | 1.32E-03 | 7.70E-03 | 2.62E-04 | 1.41E-04 | 2.92E-04 | 1.70E-03 |
| Q98A    | Pred | 0.05             | 0.03               | 0.05               | 0.31 | 1.20E-03           | 6.44E-04 | 1.41E-03 | 9.35E-03 | 2.67E-04 | 1.43E-04 | 3.13E-04 | 2.07E-03 |
|         | Expr | 0.7              | 0.23               | 0.39               | 0.73 | 2.98E-02           | 6.59E-03 | 1.29E-02 | 3.25E-02 | 2.08E-03 | 4.62E-04 | 9.01E-04 | 2.28E-03 |
| Q98B    | Pred | 1                | 0.26               | 0.53               | 0.92 | 5.76E-01           | 7.63E-03 | 2.10E-02 | 6.35E-02 | 4.03E-02 | 5.34E-04 | 1.47E-03 | 4.45E-03 |
|         | Expr | 0.32             | 0.26               | 0.47               | 0.65 | 9.50E-03           | 7.41E-03 | 1.64E-02 | 2.61E-02 | 6.65E-04 | 5.19E-04 | 1.15E-03 | 1.83E-03 |
| Y100A   | Pred | 0.36             | 0.39               | 0.67               | 0.98 | 1.12E-02           | 1.25E-02 | 3.10E-02 | 9.33E-02 | 7.85E-04 | 8.73E-04 | 2.17E-03 | 6.54E-03 |
|         | Expr | 0.19             | 0.14               | 0.25               | 0.49 | 5.41E-03           | 3.74E-03 | 7.30E-03 | 1.70E-02 | 1.02E-03 | 7.05E-04 | 1.38E-03 | 3.21E-03 |
| Y100B   | Pred | 0.21             | 0.15               | 0.3                | 0.72 | 5.82E-03           | 4.10E-03 | 9.48E-03 | 3.19E-02 | 1.10E-03 | 7.72E-04 | 1.79E-03 | 6.01E-03 |
|         | Expr | 0.05             | 0.03               | 0.06               | 0.22 | 1.24E-03           | 7.38E-04 | 1.55E-03 | 6.17E-03 | 2.35E-04 | 1.39E-04 | 2.91E-04 | 1.16E-03 |
| L101A   | Pred | 0.05             | 0.03               | 0.06               | 0.25 | 1.26E-03           | 7.51E-04 | 1.65E-03 | 7.18E-03 | 2.38E-04 | 1.42E-04 | 3.10E-04 | 1.35E-03 |
|         | Expr | 0.25             | 0.02               | 0.18               | 0.42 | 7.31E-03           | 5.76E-04 | 5.22E-03 | 1.38E-02 | 1.44E-03 | 1.14E-04 | 1.03E-03 | 2.73E-03 |
| L101B   | Pred | 0.28             | 0.02               | 0.22               | 0.56 | 8.25E-03           | 5.87E-04 | 6.51E-03 | 2.07E-02 | 1.63E-03 | 1.16E-04 | 1.28E-03 | 4.08E-03 |
|         | Expr | 0.25             | 0.03               | 0.1                | 0.25 | 7.28E-03           | 7.97E-04 | 2.84E-03 | 7.33E-03 | 1.44E-03 | 1.57E-04 | 5.60E-04 | 1.45E-03 |
| D102A   | Pred | 0.28             | 0.03               | 0.12               | 0.38 | 8.23E-03           | 8.11E-04 | 3.31E-03 | 1.18E-02 | 1.62E-03 | 1.60E-04 | 6.54E-04 | 2.33E-03 |
|         | Expr | 0.7              | 0.47               | 0.62               | 0.77 | 2.98E-02           | 1.60E-02 | 2.43E-02 | 3.70E-02 | 5.59E-03 | 3.01E-03 | 4.57E-03 | 6.95E-03 |
| D102B   | Pred | 1                | 0.84               | 0.96               | 1    | 5.76E-01           | 4.59E-02 | 3.58E-01 | 5.76E-01 | 1.08E-01 | 8.61E-03 | 6.72E-02 | 1.08E-01 |
|         | Expr | 0.68             | 0.51               | 0.64               | 0.79 | 2.87E-02           | 1.79E-02 | 2.63E-02 | 3.87E-02 | 5.39E-03 | 3.37E-03 | 4.93E-03 | 7.27E-03 |
| D103A   | Pred | 1                | 0.78               | 0.94               | 1    | 5.76E-01           | 3.73E-02 | 3.09E-01 | 5.76E-01 | 1.08E-01 | 7.01E-03 | 5.81E-02 | 1.08E-01 |
|         | Expr | 0.12             | 0.44               | 0.61               | 0.77 | 3.14E-03           | 1.46E-02 | 2.43E-02 | 3.72E-02 | 5.50E-04 | 2.55E-03 | 4.25E-03 | 6.51E-03 |
| D103B   | Pred | 0.12             | 0.5                | 0.97               | 1    | 3.28E-03           | 1.72E-02 | 5.02E-01 | 5.76E-01 | 5.73E-04 | 3.01E-03 | 8.79E-02 | 1.01E-01 |
|         | Expr | 0.68             | 0.47               | 0.63               | 0.77 | 2.87E-02           | 1.58E-02 | 2.52E-02 | 3.63E-02 | 5.02E-03 | 2.76E-03 | 4.41E-03 | 6.35E-03 |
| F104A   | Pred | 1                | 0.67               | 0.89               | 1    | 5.76E-01           | 2.80E-02 | 2.28E-01 | 5.76E-01 | 1.01E-01 | 4.90E-03 | 3.99E-02 | 1.01E-01 |
|         | Expr | 0.05             | 0.03               | 0.05               | 0.21 | 1.26E-03           | 8.22E-04 | 1.44E-03 | 5.84E-03 | 1.93E-04 | 1.26E-04 | 2.20E-04 | 8.94E-04 |
| F104B   | Pred | 0.05             | 0.03               | 0.06               | 0.24 | 1.28E-03           | 8.39E-04 | 1.52E-03 | 6.82E-03 | 1.96E-04 | 1.28E-04 | 2.32E-04 | 1.04E-03 |
|         | Expr | 0.05             | 0.03               | 0.06               | 0.3  | 1.26E-03           | 7.13E-04 | 1.69E-03 | 8.99E-03 | 1.93E-04 | 1.09E-04 | 2.58E-04 | 1.37E-03 |
| Q105A   | Pred | 0.05             | 0.03               | 0.07               | 0.4  | 1.28E-03           | 7.23E-04 | 1.98E-03 | 1.26E-02 | 1.96E-04 | 1.10E-04 | 3.02E-04 | 1.93E-03 |
|         | Expr | 0.63             | 0.03               | 0.18               | 0.74 | 2.47E-02           | 7.16E-04 | 6.03E-03 | 3.36E-02 | 1.09E-03 | 3.16E-05 | 2.66E-04 | 1.49E-03 |
| Q105B   | Pred | 0.68             | 0.03               | 0.18               | 0.71 | 2.85E-02           | 7.11E-04 | 5.91E-03 | 3.09E-02 | 1.26E-03 | 3.14E-05 | 2.61E-04 | 1.36E-03 |
|         | Expr | 0.8              | 0.03               | 0.29               | 0.69 | 4.00E-02           | 8.36E-04 | 1.00E-02 | 2.90E-02 | 1.77E-03 | 3.70E-05 | 4.42E-04 | 1.28E-03 |
|         | Pred | 1                | 0.03               | 0.32               | 0.77 | 5.76E-01           | 8.31E-04 | 1.19E-02 | 3.69E-02 | 2.54E-02 | 3.67E-05 | 5.28E-04 | 1.63E-03 |



| Residue |      | $D_o^i$          |                    |                    |                    | $k_{xc}^i$ |          |          |          | $K_u^i$  |          |          |          |
|---------|------|------------------|--------------------|--------------------|--------------------|------------|----------|----------|----------|----------|----------|----------|----------|
|         |      | DSH <sup>a</sup> | min <sup>b,c</sup> | avg <sup>b,d</sup> | max <sup>b,e</sup> | DSH        | min      | avg      | max      | DSH      | min      | avg      | max      |
| K106A   | Expr | 0.84             | 0.47               | 0.76               | 1                  | 4.59E-02   | 1.57E-02 | 8.97E-02 | 5.76E-01 | 1.85E-03 | 6.33E-04 | 3.62E-03 | 2.32E-02 |
|         | Pred | 0.91             | 0.53               | 0.68               | 0.98               | 6.10E-02   | 1.91E-02 | 3.23E-02 | 9.69E-02 | 2.46E-03 | 7.70E-04 | 1.30E-03 | 3.91E-03 |
| K106B   | Expr | 0.8              | 0.47               | 0.85               | 1                  | 4.00E-02   | 1.60E-02 | 1.28E-01 | 5.76E-01 | 1.61E-03 | 6.43E-04 | 5.15E-03 | 2.32E-02 |
|         | Pred | 1                | 0.42               | 0.85               | 1                  | 5.76E-01   | 1.36E-02 | 1.05E-01 | 5.76E-01 | 2.32E-02 | 5.48E-04 | 4.23E-03 | 2.32E-02 |
| K107A   | Expr | 0.1              | 0.19               | 0.74               | 1                  | 2.63E-03   | 5.29E-03 | 1.12E-01 | 5.76E-01 | 1.27E-04 | 2.56E-04 | 5.41E-03 | 2.79E-02 |
|         | Pred | 0.1              | 0.19               | 0.68               | 0.97               | 2.66E-03   | 5.22E-03 | 3.53E-02 | 8.38E-02 | 1.29E-04 | 2.53E-04 | 1.71E-03 | 4.06E-03 |
| K107B   | Expr | 0.17             | 0.35               | 0.66               | 1                  | 4.63E-03   | 1.09E-02 | 3.53E-02 | 1.52E-01 | 2.24E-04 | 5.29E-04 | 1.71E-03 | 7.38E-03 |
|         | Pred | 0.19             | 0.39               | 0.64               | 0.85               | 5.13E-03   | 1.23E-02 | 2.74E-02 | 4.76E-02 | 2.48E-04 | 5.94E-04 | 1.33E-03 | 2.31E-03 |
| W108A   | Expr | 0.43             | 0.03               | 0.11               | 0.47               | 1.41E-02   | 8.34E-04 | 3.11E-03 | 1.58E-02 | 1.60E-03 | 9.48E-05 | 3.53E-04 | 1.79E-03 |
|         | Pred | 0.45             | 0.03               | 0.11               | 0.52               | 1.49E-02   | 8.28E-04 | 3.23E-03 | 1.85E-02 | 1.70E-03 | 9.41E-05 | 3.67E-04 | 2.10E-03 |
| W108B   | Expr | 0.49             | 0.03               | 0.07               | 0.39               | 1.67E-02   | 7.08E-04 | 1.97E-03 | 1.25E-02 | 1.89E-03 | 8.05E-05 | 2.24E-04 | 1.42E-03 |
|         | Pred | 0.56             | 0.03               | 0.07               | 0.44               | 2.03E-02   | 7.04E-04 | 2.08E-03 | 1.46E-02 | 2.31E-03 | 7.99E-05 | 2.36E-04 | 1.66E-03 |
| Q109A   | Expr | 0.69             | 0.22               | 0.55               | 0.9                | 2.89E-02   | 6.23E-03 | 2.17E-02 | 5.65E-02 | 1.89E-03 | 4.07E-04 | 1.42E-03 | 3.69E-03 |
|         | Pred | 0.74             | 0.19               | 0.53               | 0.96               | 3.41E-02   | 5.37E-03 | 2.25E-02 | 8.12E-02 | 2.23E-03 | 3.51E-04 | 1.47E-03 | 5.31E-03 |
| Q109B   | Expr | 0.78             | 0.04               | 0.28               | 0.75               | 3.81E-02   | 1.02E-03 | 9.58E-03 | 3.48E-02 | 2.49E-03 | 6.70E-05 | 6.26E-04 | 2.27E-03 |
|         | Pred | 0.98             | 0.04               | 0.31               | 1                  | 9.71E-02   | 1.02E-03 | 3.66E-02 | 5.76E-01 | 6.35E-03 | 6.69E-05 | 2.39E-03 | 3.76E-02 |
| E110A   | Expr | 0.65             | 0.52               | 0.82               | 1                  | 2.64E-02   | 1.84E-02 | 1.70E-01 | 5.76E-01 | 3.13E-03 | 2.17E-03 | 2.02E-02 | 6.81E-02 |
|         | Pred | 0.71             | 0.5                | 0.77               | 1                  | 3.08E-02   | 1.73E-02 | 6.60E-02 | 5.76E-01 | 3.65E-03 | 2.04E-03 | 7.80E-03 | 6.81E-02 |
| E110B   | Expr | 0.45             | 0.54               | 0.8                | 1                  | 1.47E-02   | 1.92E-02 | 1.40E-01 | 5.76E-01 | 1.74E-03 | 2.28E-03 | 1.65E-02 | 6.81E-02 |
|         | Pred | 0.55             | 0.56               | 0.82               | 1                  | 2.02E-02   | 2.05E-02 | 1.44E-01 | 5.76E-01 | 2.39E-03 | 2.43E-03 | 1.70E-02 | 6.81E-02 |
| E111A   | Expr | 0.17             | 0.1                | 0.35               | 0.74               | 4.60E-03   | 2.65E-03 | 1.21E-02 | 3.39E-02 | 1.21E-03 | 7.00E-04 | 3.18E-03 | 8.95E-03 |
|         | Pred | 0.17             | 0.1                | 0.35               | 0.78               | 4.69E-03   | 2.54E-03 | 1.20E-02 | 3.84E-02 | 1.24E-03 | 6.72E-04 | 3.18E-03 | 1.01E-02 |
| E111B   | Expr | 0.03             | 0.22               | 0.55               | 0.91               | 6.51E-04   | 6.30E-03 | 2.33E-02 | 6.15E-02 | 1.72E-04 | 1.66E-03 | 6.15E-03 | 1.62E-02 |
|         | Pred | 0.03             | 0.23               | 0.54               | 0.85               | 6.57E-04   | 6.57E-03 | 2.14E-02 | 4.67E-02 | 1.74E-04 | 1.74E-03 | 5.66E-03 | 1.23E-02 |
| Y115A   | Expr | 0.39             | 0.11               | 0.18               | 0.38               | 1.24E-02   | 2.84E-03 | 5.25E-03 | 1.21E-02 | 2.18E-03 | 5.00E-04 | 9.23E-04 | 2.13E-03 |
|         | Pred | 0.45             | 0.02               | 0.12               | 0.43               | 1.49E-02   | 6.21E-04 | 3.56E-03 | 1.42E-02 | 2.63E-03 | 1.09E-04 | 6.27E-04 | 2.49E-03 |
| Y115B   | Expr | 0.19             | 0.11               | 0.27               | 0.5                | 5.24E-03   | 2.90E-03 | 8.25E-03 | 1.73E-02 | 9.21E-04 | 5.10E-04 | 1.45E-03 | 3.04E-03 |
|         | Pred | 0.05             | 0.03               | 0.25               | 0.57               | 1.15E-03   | 6.47E-04 | 8.01E-03 | 2.13E-02 | 2.03E-04 | 1.14E-04 | 1.41E-03 | 3.75E-03 |
| R116A   | Expr | 0.76             | 0.43               | 0.72               | 0.95               | 3.56E-02   | 1.38E-02 | 3.70E-02 | 7.36E-02 | 1.54E-03 | 5.98E-04 | 1.60E-03 | 3.18E-03 |
|         | Pred | 0.94             | 0.32               | 0.6                | 0.96               | 6.84E-02   | 9.58E-03 | 2.78E-02 | 8.23E-02 | 2.95E-03 | 4.14E-04 | 1.20E-03 | 3.55E-03 |
| R116B   | Expr | 0.88             | 0.04               | 0.31               | 0.92               | 5.26E-02   | 1.02E-03 | 1.23E-02 | 6.29E-02 | 2.27E-03 | 4.40E-05 | 5.31E-04 | 2.72E-03 |
|         | Pred | 0.9              | 0.04               | 0.32               | 0.86               | 5.73E-02   | 1.01E-03 | 1.32E-02 | 4.99E-02 | 2.47E-03 | 4.38E-05 | 5.70E-04 | 2.15E-03 |
| Q117A   | Expr | 0.8              | 0.82               | 0.92               | 1                  | 4.02E-02   | 4.27E-02 | 1.14E-01 | 5.76E-01 | 1.23E-03 | 1.31E-03 | 3.50E-03 | 1.76E-02 |
|         | Pred | 1                | 0.65               | 0.83               | 1                  | 5.76E-01   | 2.62E-02 | 9.95E-02 | 5.76E-01 | 1.76E-02 | 8.00E-04 | 3.04E-03 | 1.76E-02 |
| Q117B   | Expr | 0.9              | 0.51               | 0.77               | 0.95               | 5.71E-02   | 1.77E-02 | 4.02E-02 | 7.74E-02 | 1.75E-03 | 5.41E-04 | 1.23E-03 | 2.37E-03 |
|         | Pred | 0.94             | 0.52               | 0.74               | 1                  | 7.16E-02   | 1.85E-02 | 6.08E-02 | 5.76E-01 | 2.19E-03 | 5.65E-04 | 1.86E-03 | 1.76E-02 |
| K118A   | Expr | 0.54             | 0.57               | 0.84               | 0.95               | 1.95E-02   | 2.13E-02 | 5.05E-02 | 7.64E-02 | 7.84E-04 | 8.58E-04 | 2.03E-03 | 3.08E-03 |
|         | Pred | 0.66             | 0.38               | 0.69               | 1                  | 2.67E-02   | 1.19E-02 | 5.67E-02 | 5.76E-01 | 1.08E-03 | 4.80E-04 | 2.29E-03 | 2.32E-02 |
| K118B   | Expr | 0.82             | 0.52               | 0.75               | 1                  | 4.24E-02   | 1.81E-02 | 6.50E-02 | 5.76E-01 | 1.71E-03 | 7.30E-04 | 2.62E-03 | 2.32E-02 |
|         | Pred | 0.8              | 0.55               | 0.72               | 1                  | 4.03E-02   | 2.01E-02 | 5.86E-02 | 5.76E-01 | 1.62E-03 | 8.09E-04 | 2.36E-03 | 2.32E-02 |
| V119A   | Expr | 0.62             | 0.03               | 0.12               | 0.5                | 2.41E-02   | 7.61E-04 | 3.60E-03 | 1.71E-02 | 5.33E-03 | 1.69E-04 | 7.98E-04 | 3.79E-03 |
|         | Pred | 0.73             | 0.03               | 0.12               | 0.55               | 3.27E-02   | 6.90E-04 | 3.52E-03 | 1.98E-02 | 7.24E-03 | 1.53E-04 | 7.79E-04 | 4.38E-03 |
| V119B   | Expr | 0.03             | 0.03               | 0.24               | 0.77               | 7.24E-04   | 8.01E-04 | 8.00E-03 | 3.64E-02 | 1.60E-04 | 1.77E-04 | 1.77E-03 | 8.06E-03 |

| Residue |      | DSH <sup>a</sup> | $D_o^i$            |                    |                    | DSH      | $k_{xc}^i$ |          |          | DSH      | $K_u^i$  |          |          |
|---------|------|------------------|--------------------|--------------------|--------------------|----------|------------|----------|----------|----------|----------|----------|----------|
|         |      |                  | min <sup>b,c</sup> | avg <sup>b,d</sup> | max <sup>b,e</sup> |          | min        | avg      | max      |          | min      | avg      | max      |
| E120A   | Pred | 0.03             | 0.03               | 0.23               | 0.7                | 7.23E-04 | 7.86E-04   | 7.55E-03 | 3.02E-02 | 1.60E-04 | 1.74E-04 | 1.67E-03 | 6.70E-03 |
| E120A   | Expr | 0.53             | 0.61               | 0.89               | 1                  | 1.91E-02 | 2.34E-02   | 8.61E-02 | 5.76E-01 | 4.93E-03 | 6.07E-03 | 2.23E-02 | 1.49E-01 |
| E120B   | Pred | 0.67             | 0.52               | 0.8                | 1                  | 2.75E-02 | 1.86E-02   | 1.16E-01 | 5.76E-01 | 7.12E-03 | 4.81E-03 | 3.01E-02 | 1.49E-01 |
| E120B   | Expr | 0.86             | 0.31               | 0.64               | 0.97               | 5.00E-02 | 9.33E-03   | 2.94E-02 | 9.02E-02 | 1.29E-02 | 2.41E-03 | 7.60E-03 | 2.33E-02 |
| L122A   | Pred | 0.89             | 0.27               | 0.63               | 1                  | 5.45E-02 | 7.84E-03   | 5.31E-02 | 5.76E-01 | 1.41E-02 | 2.03E-03 | 1.38E-02 | 1.49E-01 |
| L122A   | Expr | 0.59             | 0.04               | 0.14               | 0.71               | 2.24E-02 | 1.05E-03   | 4.70E-03 | 3.09E-02 | 8.63E-03 | 4.05E-04 | 1.81E-03 | 1.19E-02 |
| L122B   | Pred | 0.7              | 0.04               | 0.14               | 0.63               | 2.98E-02 | 1.02E-03   | 4.38E-03 | 2.46E-02 | 1.15E-02 | 3.94E-04 | 1.68E-03 | 9.45E-03 |
| L122B   | Expr | 0.36             | 0.22               | 0.67               | 0.96               | 1.12E-02 | 6.09E-03   | 3.42E-02 | 8.12E-02 | 4.31E-03 | 2.34E-03 | 1.32E-02 | 3.12E-02 |
| R123A   | Pred | 0.36             | 0.14               | 0.67               | 1                  | 1.10E-02 | 3.76E-03   | 8.87E-02 | 5.76E-01 | 4.23E-03 | 1.45E-03 | 3.41E-02 | 2.22E-01 |
| R123A   | Expr | 0.36             | 0.1                | 0.57               | 0.85               | 1.10E-02 | 2.60E-03   | 2.33E-02 | 4.78E-02 | 8.64E-04 | 2.04E-04 | 1.83E-03 | 3.75E-03 |
| R123B   | Pred | 0.41             | 0.1                | 0.45               | 0.77               | 1.32E-02 | 2.52E-03   | 1.62E-02 | 3.62E-02 | 1.04E-03 | 1.98E-04 | 1.28E-03 | 2.85E-03 |
| R123B   | Expr | 0.27             | 0.03               | 0.78               | 0.95               | 7.94E-03 | 6.64E-04   | 4.30E-02 | 7.38E-02 | 6.24E-04 | 5.21E-05 | 3.38E-03 | 5.80E-03 |
| A124A   | Pred | 0.27             | 0.03               | 0.76               | 1                  | 7.86E-03 | 6.51E-04   | 1.63E-01 | 5.76E-01 | 6.17E-04 | 5.12E-05 | 1.28E-02 | 4.52E-02 |
| A124A   | Expr | 0.73             | 0.63               | 0.81               | 0.96               | 3.23E-02 | 2.47E-02   | 4.61E-02 | 7.97E-02 | 1.13E-03 | 8.68E-04 | 1.62E-03 | 2.80E-03 |
| A124B   | Pred | 0.91             | 0.45               | 0.66               | 0.89               | 5.94E-02 | 1.48E-02   | 2.96E-02 | 5.52E-02 | 2.09E-03 | 5.19E-04 | 1.04E-03 | 1.94E-03 |
| A124B   | Expr | 0.92             | 0.54               | 0.81               | 0.93               | 6.17E-02 | 1.94E-02   | 4.70E-02 | 6.80E-02 | 2.17E-03 | 6.81E-04 | 1.65E-03 | 2.39E-03 |
| E125A   | Pred | 0.97             | 0.37               | 0.81               | 1                  | 8.93E-02 | 1.16E-02   | 2.43E-01 | 5.76E-01 | 3.14E-03 | 4.07E-04 | 8.54E-03 | 2.02E-02 |
| E125A   | Expr | 0.82             | 0.67               | 0.87               | 1                  | 4.26E-02 | 2.75E-02   | 1.97E-01 | 5.76E-01 | 7.98E-03 | 5.16E-03 | 3.70E-02 | 1.08E-01 |
| E125B   | Pred | 0.73             | 0.33               | 0.6                | 1                  | 3.26E-02 | 9.83E-03   | 5.21E-02 | 5.76E-01 | 6.10E-03 | 1.84E-03 | 9.77E-03 | 1.08E-01 |
| E125B   | Expr | 0.83             | 0.48               | 0.79               | 1                  | 4.40E-02 | 1.64E-02   | 7.02E-02 | 5.76E-01 | 8.24E-03 | 3.08E-03 | 1.32E-02 | 1.08E-01 |
| L126A   | Pred | 0.64             | 0.42               | 0.65               | 1                  | 2.53E-02 | 1.36E-02   | 8.02E-02 | 5.76E-01 | 4.75E-03 | 2.56E-03 | 1.50E-02 | 1.08E-01 |
| L126A   | Expr | 0.38             | 0.04               | 0.14               | 0.5                | 1.18E-02 | 1.04E-03   | 4.26E-03 | 1.72E-02 | 3.67E-03 | 3.26E-04 | 1.33E-03 | 5.35E-03 |
| L126B   | Pred | 0.34             | 0.03               | 0.09               | 0.39               | 1.04E-02 | 7.80E-04   | 2.49E-03 | 1.24E-02 | 3.24E-03 | 2.43E-04 | 7.76E-04 | 3.88E-03 |
| L126B   | Expr | 0.43             | 0.05               | 0.29               | 0.75               | 1.39E-02 | 1.18E-03   | 9.63E-03 | 3.46E-02 | 4.34E-03 | 3.69E-04 | 3.01E-03 | 1.08E-02 |
| Q127A   | Pred | 0.31             | 0.03               | 0.23               | 0.73               | 9.30E-03 | 8.28E-04   | 7.49E-03 | 3.26E-02 | 2.90E-03 | 2.58E-04 | 2.34E-03 | 1.02E-02 |
| Q127A   | Expr | 0.76             | 0.04               | 0.2                | 0.58               | 3.54E-02 | 1.09E-03   | 6.18E-03 | 2.19E-02 | 2.91E-03 | 8.99E-05 | 5.08E-04 | 1.80E-03 |
| Q127B   | Pred | 0.82             | 0.03               | 0.09               | 0.36               | 4.35E-02 | 7.95E-04   | 2.47E-03 | 1.13E-02 | 3.58E-03 | 6.54E-05 | 2.03E-04 | 9.31E-04 |
| Q127B   | Expr | 0.24             | 0.03               | 0.56               | 0.96               | 6.74E-03 | 8.45E-04   | 2.95E-02 | 7.99E-02 | 5.55E-04 | 6.95E-05 | 2.42E-03 | 6.58E-03 |
| E128A   | Pred | 0.18             | 0.03               | 0.46               | 0.87               | 4.90E-03 | 8.20E-04   | 1.97E-02 | 5.18E-02 | 4.03E-04 | 6.75E-05 | 1.62E-03 | 4.26E-03 |
| E128A   | Expr | 0.67             | 0.76               | 0.98               | 1                  | 2.74E-02 | 3.53E-02   | 4.13E-01 | 5.76E-01 | 3.24E-03 | 4.17E-03 | 4.88E-02 | 6.81E-02 |
| E128B   | Pred | 0.59             | 0.51               | 0.79               | 1                  | 2.23E-02 | 1.77E-02   | 9.16E-02 | 5.76E-01 | 2.64E-03 | 2.10E-03 | 1.08E-02 | 6.81E-02 |
| E128B   | Expr | 1                | 0.72               | 0.89               | 1                  | 1.38E-01 | 3.23E-02   | 1.12E-01 | 5.76E-01 | 1.64E-02 | 3.82E-03 | 1.32E-02 | 6.81E-02 |
| G129A   | Pred | 1                | 0.58               | 0.77               | 1                  | 5.76E-01 | 2.17E-02   | 6.43E-02 | 5.76E-01 | 6.81E-02 | 2.57E-03 | 7.61E-03 | 6.81E-02 |
| G129A   | Expr | 0.85             | 0.04               | 0.32               | 0.95               | 4.81E-02 | 9.54E-04   | 1.43E-02 | 7.39E-02 | 2.12E-03 | 4.21E-05 | 6.29E-04 | 3.26E-03 |
| G129B   | Pred | 0.87             | 0.03               | 0.17               | 0.77               | 5.06E-02 | 8.15E-04   | 6.30E-03 | 3.72E-02 | 2.23E-03 | 3.59E-05 | 2.78E-04 | 1.64E-03 |
| G129B   | Expr | 0.75             | 0.27               | 0.68               | 0.97               | 3.46E-02 | 7.99E-03   | 3.66E-02 | 8.70E-02 | 1.53E-03 | 3.52E-04 | 1.61E-03 | 3.83E-03 |
| A130A   | Pred | 0.62             | 0.18               | 0.56               | 1                  | 2.43E-02 | 5.03E-03   | 5.13E-02 | 5.76E-01 | 1.07E-03 | 2.22E-04 | 2.26E-03 | 2.54E-02 |
| A130A   | Expr | 0.03             | 0.04               | 0.12               | 0.34               | 8.51E-04 | 9.98E-04   | 3.30E-03 | 1.04E-02 | 3.35E-05 | 3.93E-05 | 1.30E-04 | 4.11E-04 |
| A130B   | Pred | 0.03             | 0.03               | 0.06               | 0.27               | 8.38E-04 | 7.97E-04   | 1.59E-03 | 7.78E-03 | 3.30E-05 | 3.14E-05 | 6.27E-05 | 3.06E-04 |
| A130B   | Expr | 0.05             | 0.03               | 0.05               | 0.07               | 1.36E-03 | 7.46E-04   | 1.20E-03 | 1.74E-03 | 5.36E-05 | 2.94E-05 | 4.74E-05 | 6.87E-05 |
| R131A   | Pred | 0.05             | 0.03               | 0.04               | 0.05               | 1.26E-03 | 6.90E-04   | 1.07E-03 | 1.28E-03 | 4.96E-05 | 2.72E-05 | 4.21E-05 | 5.05E-05 |
| R131A   | Expr | 0.92             | 0.44               | 0.92               | 1                  | 6.40E-02 | 1.46E-02   | 2.68E-01 | 5.76E-01 | 3.10E-03 | 7.09E-04 | 1.30E-02 | 2.79E-02 |
|         | Pred | 1                | 0.3                | 0.61               | 0.9                | 5.76E-01 | 9.03E-03   | 2.51E-02 | 5.64E-02 | 2.79E-02 | 4.38E-04 | 1.22E-03 | 2.73E-03 |

| Residue |      | $D_0^i$          |                    |                    |                    | $k_{xc}^i$ |          |          |          | $K_u^i$  |          |          |          |
|---------|------|------------------|--------------------|--------------------|--------------------|------------|----------|----------|----------|----------|----------|----------|----------|
|         |      | DSH <sup>a</sup> | min <sup>b,c</sup> | avg <sup>b,d</sup> | max <sup>b,e</sup> | DSH        | min      | avg      | max      | DSH      | min      | avg      | max      |
| R131B   | Expr | 0.99             | 0.65               | 0.83               | 0.98               | 1.11E-01   | 2.62E-02 | 4.86E-02 | 1.03E-01 | 5.36E-03 | 1.27E-03 | 2.36E-03 | 4.97E-03 |
|         | Pred | 0.95             | 0.45               | 0.66               | 0.84               | 7.53E-02   | 1.50E-02 | 2.83E-02 | 4.62E-02 | 3.65E-03 | 7.27E-04 | 1.37E-03 | 2.24E-03 |
| Q132A   | Expr | 0.92             | 0.83               | 0.97               | 1                  | 6.40E-02   | 4.39E-02 | 4.31E-01 | 5.76E-01 | 1.96E-03 | 1.34E-03 | 1.32E-02 | 1.76E-02 |
|         | Pred | 1                | 0.59               | 0.78               | 1                  | 5.76E-01   | 2.25E-02 | 6.53E-02 | 5.76E-01 | 1.76E-02 | 6.88E-04 | 2.00E-03 | 1.76E-02 |
| Q132B   | Expr | 0.82             | 0.71               | 0.92               | 1                  | 4.27E-02   | 3.11E-02 | 1.88E-01 | 5.76E-01 | 1.30E-03 | 9.51E-04 | 5.74E-03 | 1.76E-02 |
|         | Pred | 0.68             | 0.5                | 0.81               | 1                  | 2.88E-02   | 1.74E-02 | 1.19E-01 | 5.76E-01 | 8.81E-04 | 5.33E-04 | 3.64E-03 | 1.76E-02 |
| K133A   | Expr | 0.04             | 0.03               | 0.9                | 1                  | 9.93E-04   | 7.71E-04 | 2.84E-01 | 5.76E-01 | 4.00E-05 | 3.11E-05 | 1.15E-02 | 2.32E-02 |
|         | Pred | 0.04             | 0.03               | 0.7                | 1                  | 9.78E-04   | 7.45E-04 | 6.96E-02 | 5.76E-01 | 3.94E-05 | 3.00E-05 | 2.81E-03 | 2.32E-02 |
| K133B   | Expr | 0.05             | 0.1                | 0.69               | 0.97               | 1.37E-03   | 2.57E-03 | 3.57E-02 | 8.45E-02 | 5.52E-05 | 1.04E-04 | 1.44E-03 | 3.40E-03 |
|         | Pred | 0.05             | 0.09               | 0.57               | 1                  | 1.27E-03   | 2.25E-03 | 4.95E-02 | 5.76E-01 | 5.11E-05 | 9.06E-05 | 1.99E-03 | 2.32E-02 |
| L134A   | Expr | 0.71             | 0.05               | 0.24               | 0.86               | 3.13E-02   | 1.40E-03 | 9.22E-03 | 4.83E-02 | 5.26E-03 | 2.35E-04 | 1.55E-03 | 8.12E-03 |
|         | Pred | 0.65             | 0.03               | 0.12               | 0.6                | 2.62E-02   | 7.67E-04 | 3.83E-03 | 2.28E-02 | 4.39E-03 | 1.29E-04 | 6.43E-04 | 3.84E-03 |
| L134B   | Expr | 0.64             | 0.03               | 0.16               | 0.54               | 2.53E-02   | 8.69E-04 | 4.96E-03 | 1.97E-02 | 4.25E-03 | 1.46E-04 | 8.33E-04 | 3.30E-03 |
|         | Pred | 0.51             | 0.03               | 0.13               | 0.42               | 1.80E-02   | 8.23E-04 | 3.79E-03 | 1.35E-02 | 3.03E-03 | 1.38E-04 | 6.38E-04 | 2.28E-03 |
| H135A   | Expr | 0.84             | 0.15               | 0.73               | 1                  | 4.58E-02   | 4.09E-03 | 1.39E-01 | 5.76E-01 | 2.73E-03 | 2.43E-04 | 8.26E-03 | 3.43E-02 |
|         | Pred | 0.86             | 0.04               | 0.45               | 0.93               | 4.91E-02   | 9.45E-04 | 2.02E-02 | 6.74E-02 | 2.92E-03 | 5.63E-05 | 1.20E-03 | 4.02E-03 |
| H135B   | Expr | 0.89             | 0.72               | 0.87               | 1                  | 5.46E-02   | 3.20E-02 | 1.05E-01 | 5.76E-01 | 3.25E-03 | 1.91E-03 | 6.26E-03 | 3.43E-02 |
|         | Pred | 0.77             | 0.5                | 0.73               | 1                  | 3.65E-02   | 1.72E-02 | 8.44E-02 | 5.76E-01 | 2.18E-03 | 1.03E-03 | 5.03E-03 | 3.43E-02 |
| E136A   | Expr | 0.38             | 0.32               | 0.92               | 1                  | 1.19E-02   | 9.50E-03 | 9.92E-02 | 5.76E-01 | 1.03E-03 | 8.27E-04 | 8.64E-03 | 5.01E-02 |
|         | Pred | 0.38             | 0.29               | 0.79               | 1                  | 1.21E-02   | 8.43E-03 | 7.26E-02 | 5.76E-01 | 1.06E-03 | 7.34E-04 | 6.32E-03 | 5.01E-02 |
| E136B   | Expr | 0.72             | 0.68               | 0.91               | 0.98               | 3.17E-02   | 2.84E-02 | 6.86E-02 | 9.64E-02 | 2.76E-03 | 2.47E-03 | 5.97E-03 | 8.40E-03 |
|         | Pred | 0.68             | 0.61               | 0.86               | 1                  | 2.85E-02   | 2.35E-02 | 1.76E-01 | 5.76E-01 | 2.48E-03 | 2.04E-03 | 1.54E-02 | 5.01E-02 |
| L137A   | Expr | 0.54             | 0.04               | 0.17               | 0.7                | 1.95E-02   | 9.94E-04 | 5.86E-03 | 3.04E-02 | 6.09E-03 | 3.10E-04 | 1.83E-03 | 9.47E-03 |
|         | Pred | 0.62             | 0.03               | 0.13               | 0.63               | 2.45E-02   | 7.24E-04 | 4.28E-03 | 2.50E-02 | 7.63E-03 | 2.26E-04 | 1.33E-03 | 7.80E-03 |
| L137B   | Expr | 0.05             | 0.03               | 0.08               | 0.45               | 1.24E-03   | 6.98E-04 | 2.29E-03 | 1.49E-02 | 3.87E-04 | 2.18E-04 | 7.13E-04 | 4.64E-03 |
|         | Pred | 0.05             | 0.03               | 0.08               | 0.43               | 1.24E-03   | 6.96E-04 | 2.25E-03 | 1.41E-02 | 3.87E-04 | 2.17E-04 | 7.01E-04 | 4.39E-03 |
| Q138A   | Expr | 0.46             | 0.03               | 0.12               | 0.84               | 1.56E-02   | 8.49E-04 | 4.32E-03 | 4.61E-02 | 1.28E-03 | 6.99E-05 | 3.55E-04 | 3.79E-03 |
|         | Pred | 0.57             | 0.03               | 0.08               | 0.73               | 2.12E-02   | 7.96E-04 | 2.86E-03 | 3.29E-02 | 1.74E-03 | 6.55E-05 | 2.36E-04 | 2.70E-03 |
| Q138B   | Expr | 0.65             | 0.03               | 0.31               | 0.84               | 2.63E-02   | 7.29E-04 | 1.17E-02 | 4.56E-02 | 2.16E-03 | 6.00E-05 | 9.61E-04 | 3.76E-03 |
|         | Pred | 0.72             | 0.03               | 0.26               | 0.89               | 3.16E-02   | 6.73E-04 | 9.94E-03 | 5.47E-02 | 2.60E-03 | 5.54E-05 | 8.18E-04 | 4.50E-03 |
| E139A   | Expr | 0.81             | 0.83               | 0.92               | 0.96               | 4.15E-02   | 4.39E-02 | 6.61E-02 | 8.37E-02 | 4.91E-03 | 5.20E-03 | 7.82E-03 | 9.90E-03 |
|         | Pred | 1                | 0.61               | 0.84               | 1                  | 1.70E-01   | 2.38E-02 | 2.22E-01 | 5.76E-01 | 2.01E-02 | 2.82E-03 | 2.63E-02 | 6.81E-02 |
| E139B   | Expr | 0.88             | 0.52               | 0.79               | 0.93               | 5.30E-02   | 1.85E-02 | 4.16E-02 | 6.54E-02 | 6.27E-03 | 2.19E-03 | 4.93E-03 | 7.74E-03 |
|         | Pred | 0.98             | 0.5                | 0.67               | 0.91               | 9.49E-02   | 1.74E-02 | 3.01E-02 | 6.02E-02 | 1.12E-02 | 2.05E-03 | 3.56E-03 | 7.12E-03 |
| K140A   | Expr | 0.47             | 0.33               | 0.85               | 0.97               | 1.58E-02   | 9.86E-03 | 5.63E-02 | 8.38E-02 | 1.43E-03 | 8.87E-04 | 5.06E-03 | 7.54E-03 |
|         | Pred | 0.55             | 0.29               | 0.74               | 1                  | 2.02E-02   | 8.71E-03 | 1.37E-01 | 5.76E-01 | 1.81E-03 | 7.84E-04 | 1.23E-02 | 5.18E-02 |
| K140B   | Expr | 0.33             | 0.37               | 0.82               | 0.97               | 9.83E-03   | 1.14E-02 | 5.11E-02 | 8.45E-02 | 8.85E-04 | 1.02E-03 | 4.60E-03 | 7.60E-03 |
|         | Pred | 0.35             | 0.36               | 0.75               | 1                  | 1.09E-02   | 1.12E-02 | 1.38E-01 | 5.76E-01 | 9.80E-04 | 1.01E-03 | 1.24E-02 | 5.18E-02 |
| L141A   | Expr | 0.7              | 0.04               | 0.37               | 0.95               | 3.00E-02   | 9.64E-04 | 1.62E-02 | 7.47E-02 | 5.04E-03 | 1.62E-04 | 2.73E-03 | 1.25E-02 |
|         | Pred | 0.77             | 0.03               | 0.2                | 0.87               | 3.63E-02   | 7.20E-04 | 7.37E-03 | 5.09E-02 | 6.10E-03 | 1.21E-04 | 1.24E-03 | 8.55E-03 |
| L141B   | Expr | 0.52             | 0.03               | 0.1                | 0.53               | 1.83E-02   | 8.62E-04 | 2.97E-03 | 1.89E-02 | 3.07E-03 | 1.45E-04 | 4.99E-04 | 3.17E-03 |
|         | Pred | 0.49             | 0.02               | 0.06               | 0.42               | 1.70E-02   | 5.40E-04 | 1.81E-03 | 1.38E-02 | 2.85E-03 | 9.07E-05 | 3.05E-04 | 2.32E-03 |
| S142A   | Expr | 0.87             | 0.89               | 0.97               | 1                  | 5.01E-02   | 5.53E-02 | 1.12E-01 | 5.76E-01 | 2.02E-03 | 2.23E-03 | 4.53E-03 | 2.32E-02 |

| Residue |      | DSH <sup>a</sup> | $D_0^i$            |                    |                    | DSH      | $k_{xc}^i$ |          |          | DSH      | $K_u^i$  |          |          |
|---------|------|------------------|--------------------|--------------------|--------------------|----------|------------|----------|----------|----------|----------|----------|----------|
|         |      |                  | min <sup>b,c</sup> | avg <sup>b,d</sup> | max <sup>b,e</sup> |          | min        | avg      | max      |          | min      | avg      | max      |
| S142B   | Pred | 1                | 0.53               | 0.86               | 1                  | 5.76E-01 | 1.90E-02   | 2.95E-01 | 5.76E-01 | 2.32E-02 | 7.66E-04 | 1.19E-02 | 2.32E-02 |
|         | Expr | 0.92             | 0.78               | 0.93               | 0.99               | 6.43E-02 | 3.80E-02   | 7.57E-02 | 1.14E-01 | 2.59E-03 | 1.53E-03 | 3.05E-03 | 4.58E-03 |
| L144A   | Pred | 0.99             | 0.55               | 0.83               | 1                  | 1.11E-01 | 2.02E-02   | 1.70E-01 | 5.76E-01 | 4.47E-03 | 8.15E-04 | 6.85E-03 | 2.32E-02 |
|         | Expr | 0.4              | 0.06               | 0.55               | 0.97               | 1.29E-02 | 1.51E-03   | 3.10E-02 | 9.07E-02 | 4.97E-03 | 5.80E-04 | 1.19E-02 | 3.49E-02 |
| L144B   | Pred | 0.42             | 0.04               | 0.32               | 0.97               | 1.36E-02 | 9.05E-04   | 1.38E-02 | 8.92E-02 | 5.23E-03 | 3.48E-04 | 5.31E-03 | 3.43E-02 |
|         | Expr | 0.73             | 0.17               | 0.76               | 0.98               | 3.23E-02 | 4.70E-03   | 4.13E-02 | 9.43E-02 | 1.24E-02 | 1.81E-03 | 1.59E-02 | 3.63E-02 |
| G145A   | Pred | 0.72             | 0.05               | 0.56               | 0.99               | 3.15E-02 | 1.28E-03   | 2.57E-02 | 1.21E-01 | 1.21E-02 | 4.94E-04 | 9.88E-03 | 4.65E-02 |
|         | Expr | 0.71             | 0.05               | 0.27               | 0.81               | 3.06E-02 | 1.33E-03   | 1.05E-02 | 4.20E-02 | 1.55E-03 | 6.74E-05 | 5.31E-04 | 2.13E-03 |
| G145B   | Pred | 0.77             | 0.03               | 0.15               | 0.67               | 3.71E-02 | 6.90E-04   | 5.10E-03 | 2.78E-02 | 1.88E-03 | 3.50E-05 | 2.59E-04 | 1.41E-03 |
|         | Expr | 0.33             | 0.04               | 0.21               | 0.55               | 1.01E-02 | 1.06E-03   | 6.59E-03 | 2.00E-02 | 5.13E-04 | 5.35E-05 | 3.34E-04 | 1.01E-03 |
| E146A   | Pred | 0.32             | 0.03               | 0.12               | 0.41               | 9.82E-03 | 7.33E-04   | 3.47E-03 | 1.33E-02 | 4.98E-04 | 3.72E-05 | 1.76E-04 | 6.76E-04 |
|         | Expr | 0.87             | 0.77               | 0.93               | 0.99               | 5.01E-02 | 3.71E-02   | 7.14E-02 | 1.13E-01 | 6.35E-03 | 4.70E-03 | 9.06E-03 | 1.43E-02 |
| E146B   | Pred | 1                | 0.5                | 0.7                | 1                  | 5.76E-01 | 1.72E-02   | 8.16E-02 | 5.76E-01 | 7.30E-02 | 2.17E-03 | 1.03E-02 | 7.30E-02 |
|         | Expr | 0.92             | 0.61               | 0.91               | 0.99               | 6.37E-02 | 2.37E-02   | 7.36E-02 | 1.07E-01 | 8.08E-03 | 3.00E-03 | 9.33E-03 | 1.36E-02 |
| E147A   | Pred | 0.98             | 0.46               | 0.82               | 1                  | 1.03E-01 | 1.53E-02   | 1.46E-01 | 5.76E-01 | 1.31E-02 | 1.94E-03 | 1.85E-02 | 7.30E-02 |
|         | Expr | 0.61             | 0.87               | 0.95               | 0.99               | 2.38E-02 | 5.09E-02   | 7.95E-02 | 1.23E-01 | 6.29E-03 | 1.34E-02 | 2.10E-02 | 3.24E-02 |
| E147B   | Pred | 0.6              | 0.55               | 0.77               | 0.99               | 2.27E-02 | 2.02E-02   | 4.50E-02 | 1.30E-01 | 5.99E-03 | 5.33E-03 | 1.19E-02 | 3.43E-02 |
|         | Expr | 0.94             | 0.85               | 0.94               | 0.99               | 7.13E-02 | 4.76E-02   | 7.65E-02 | 1.20E-01 | 1.88E-02 | 1.26E-02 | 2.02E-02 | 3.18E-02 |
| R149A   | Pred | 1                | 0.67               | 0.85               | 1                  | 5.76E-01 | 2.74E-02   | 1.97E-01 | 5.76E-01 | 1.52E-01 | 7.25E-03 | 5.19E-02 | 1.52E-01 |
|         | Expr | 0.72             | 0.04               | 0.3                | 0.63               | 3.14E-02 | 1.08E-03   | 1.04E-02 | 2.49E-02 | 1.18E-03 | 4.07E-05 | 3.93E-04 | 9.35E-04 |
| R149B   | Pred | 0.6              | 0.04               | 0.41               | 0.85               | 2.31E-02 | 1.09E-03   | 1.85E-02 | 4.81E-02 | 8.69E-04 | 4.11E-05 | 6.95E-04 | 1.81E-03 |
|         | Expr | 0.12             | 0.11               | 0.29               | 0.4                | 3.06E-03 | 2.81E-03   | 8.58E-03 | 1.26E-02 | 1.15E-04 | 1.06E-04 | 3.23E-04 | 4.75E-04 |
| D150A   | Pred | 0.12             | 0.11               | 0.3                | 0.44               | 3.29E-03 | 2.79E-03   | 8.91E-03 | 1.46E-02 | 1.24E-04 | 1.05E-04 | 3.35E-04 | 5.51E-04 |
|         | Expr | 1                | 0.54               | 0.74               | 1                  | 5.76E-01 | 1.96E-02   | 6.08E-02 | 5.76E-01 | 4.02E-02 | 1.36E-03 | 4.24E-03 | 4.02E-02 |
| D150B   | Pred | 1                | 0.58               | 0.93               | 1                  | 5.76E-01 | 2.19E-02   | 4.23E-01 | 5.76E-01 | 4.02E-02 | 1.53E-03 | 2.95E-02 | 4.02E-02 |
|         | Expr | 0.77             | 0.52               | 0.87               | 1                  | 3.64E-02 | 1.83E-02   | 1.97E-01 | 5.76E-01 | 2.54E-03 | 1.28E-03 | 1.38E-02 | 4.02E-02 |
| R151A   | Pred | 1                | 0.59               | 0.93               | 1                  | 5.76E-01 | 2.23E-02   | 2.84E-01 | 5.76E-01 | 4.02E-02 | 1.56E-03 | 1.98E-02 | 4.02E-02 |
|         | Expr | 0.19             | 0.26               | 0.56               | 0.72               | 5.14E-03 | 7.50E-03   | 2.16E-02 | 3.15E-02 | 3.76E-04 | 5.49E-04 | 1.58E-03 | 2.30E-03 |
| R151B   | Pred | 0.18             | 0.26               | 0.72               | 1                  | 4.86E-03 | 7.50E-03   | 1.82E-01 | 5.76E-01 | 3.56E-04 | 5.49E-04 | 1.34E-02 | 4.21E-02 |
|         | Expr | 0.46             | 0.58               | 0.78               | 1                  | 1.56E-02 | 2.14E-02   | 1.63E-01 | 5.76E-01 | 1.14E-03 | 1.57E-03 | 1.19E-02 | 4.21E-02 |
| A152A   | Pred | 0.53             | 0.53               | 0.84               | 1                  | 1.91E-02 | 1.88E-02   | 2.20E-01 | 5.76E-01 | 1.40E-03 | 1.38E-03 | 1.61E-02 | 4.21E-02 |
|         | Expr | 0.05             | 0.03               | 0.05               | 0.21               | 1.15E-03 | 8.06E-04   | 1.26E-03 | 5.89E-03 | 4.05E-05 | 2.83E-05 | 4.44E-05 | 2.07E-04 |
| A152B   | Pred | 0.04             | 0.03               | 0.05               | 0.24               | 1.14E-03 | 8.12E-04   | 1.32E-03 | 6.92E-03 | 4.01E-05 | 2.85E-05 | 4.64E-05 | 2.43E-04 |
|         | Expr | 0.33             | 0.03               | 0.04               | 0.05               | 9.83E-03 | 7.11E-04   | 9.63E-04 | 1.29E-03 | 3.45E-04 | 2.50E-05 | 3.38E-05 | 4.53E-05 |
| R153A   | Pred | 0.37             | 0.03               | 0.04               | 0.05               | 1.14E-02 | 7.19E-04   | 9.64E-04 | 1.28E-03 | 4.00E-04 | 2.52E-05 | 3.38E-05 | 4.50E-05 |
|         | Expr | 0.65             | 0.38               | 0.58               | 0.85               | 2.63E-02 | 1.20E-02   | 2.27E-02 | 4.76E-02 | 1.27E-03 | 5.80E-04 | 1.10E-03 | 2.31E-03 |
| R153B   | Pred | 0.56             | 0.4                | 0.71               | 1                  | 2.04E-02 | 1.27E-02   | 3.97E-02 | 1.36E-01 | 9.86E-04 | 6.14E-04 | 1.92E-03 | 6.60E-03 |
|         | Expr | 0.53             | 0.42               | 0.6                | 0.83               | 1.90E-02 | 1.37E-02   | 2.43E-02 | 4.40E-02 | 9.22E-04 | 6.62E-04 | 1.18E-03 | 2.13E-03 |
| A154A   | Pred | 0.62             | 0.42               | 0.63               | 0.98               | 2.44E-02 | 1.35E-02   | 2.83E-02 | 9.76E-02 | 1.18E-03 | 6.54E-04 | 1.37E-03 | 4.73E-03 |
|         | Expr | 0.7              | 0.36               | 0.64               | 0.97               | 3.03E-02 | 1.11E-02   | 3.02E-02 | 8.60E-02 | 1.06E-03 | 3.88E-04 | 1.06E-03 | 3.02E-03 |
| A154B   | Pred | 0.59             | 0.52               | 0.8                | 1                  | 2.24E-02 | 1.82E-02   | 1.45E-01 | 5.76E-01 | 7.86E-04 | 6.39E-04 | 5.08E-03 | 2.02E-02 |
|         | Expr | 0.69             | 0.48               | 0.79               | 1                  | 2.95E-02 | 1.65E-02   | 9.19E-02 | 5.76E-01 | 1.03E-03 | 5.80E-04 | 3.22E-03 | 2.02E-02 |
|         | Pred | 0.9              | 0.4                | 0.84               | 1                  | 5.81E-02 | 1.26E-02   | 2.22E-01 | 5.76E-01 | 2.04E-03 | 4.43E-04 | 7.80E-03 | 2.02E-02 |

| Residue |      | $D_0^i$          |                    |                    |                    | $k_{xc}^i$ |          |          |          | $K_u^i$  |          |          |          |
|---------|------|------------------|--------------------|--------------------|--------------------|------------|----------|----------|----------|----------|----------|----------|----------|
|         |      | DSH <sup>a</sup> | min <sup>b,c</sup> | avg <sup>b,d</sup> | max <sup>b,e</sup> | DSH        | min      | avg      | max      | DSH      | min      | avg      | max      |
| H155A   | Expr | 0.13             | 0.16               | 0.61               | 0.9                | 3.39E-03   | 4.29E-03 | 2.58E-02 | 5.67E-02 | 1.25E-04 | 1.57E-04 | 9.47E-04 | 2.08E-03 |
|         | Pred | 0.12             | 0.16               | 0.75               | 1                  | 3.31E-03   | 4.29E-03 | 9.11E-02 | 5.76E-01 | 1.22E-04 | 1.57E-04 | 3.35E-03 | 2.11E-02 |
| H155B   | Expr | 0.55             | 0.09               | 0.44               | 0.99               | 1.97E-02   | 2.29E-03 | 2.07E-02 | 1.23E-01 | 7.24E-04 | 8.40E-05 | 7.59E-04 | 4.51E-03 |
|         | Pred | 0.71             | 0.09               | 0.45               | 0.94               | 3.10E-02   | 2.37E-03 | 1.87E-02 | 7.02E-02 | 1.14E-03 | 8.69E-05 | 6.88E-04 | 2.58E-03 |
| V156A   | Expr | 0.05             | 0.03               | 0.05               | 0.14               | 1.29E-03   | 8.65E-04 | 1.41E-03 | 3.70E-03 | 1.75E-04 | 1.17E-04 | 1.92E-04 | 5.01E-04 |
|         | Pred | 0.05             | 0.03               | 0.06               | 0.15               | 1.28E-03   | 8.76E-04 | 1.45E-03 | 3.93E-03 | 1.73E-04 | 1.19E-04 | 1.96E-04 | 5.33E-04 |
| V156B   | Expr | 0.37             | 0.02               | 0.09               | 0.39               | 1.17E-02   | 6.10E-04 | 2.64E-03 | 1.24E-02 | 1.58E-03 | 8.27E-05 | 3.58E-04 | 1.68E-03 |
|         | Pred | 0.41             | 0.02               | 0.1                | 0.45               | 1.33E-02   | 6.05E-04 | 2.87E-03 | 1.51E-02 | 1.81E-03 | 8.20E-05 | 3.89E-04 | 2.05E-03 |
| D157A   | Expr | 0.4              | 0.53               | 0.73               | 0.99               | 1.29E-02   | 1.87E-02 | 3.92E-02 | 1.08E-01 | 2.07E-03 | 3.00E-03 | 6.26E-03 | 1.72E-02 |
|         | Pred | 0.38             | 0.57               | 0.91               | 1                  | 1.18E-02   | 2.10E-02 | 2.82E-01 | 5.76E-01 | 1.89E-03 | 3.36E-03 | 4.51E-02 | 9.20E-02 |
| D157B   | Expr | 0.05             | 0.05               | 0.53               | 1                  | 1.27E-03   | 1.29E-03 | 4.96E-02 | 5.76E-01 | 2.03E-04 | 2.06E-04 | 7.92E-03 | 9.20E-02 |
|         | Pred | 0.05             | 0.05               | 0.58               | 1                  | 1.28E-03   | 1.28E-03 | 1.76E-01 | 5.76E-01 | 2.05E-04 | 2.05E-04 | 2.82E-02 | 9.20E-02 |
| A158A   | Expr | 0.72             | 0.04               | 0.35               | 0.95               | 3.20E-02   | 9.06E-04 | 1.41E-02 | 7.34E-02 | 2.82E-03 | 7.97E-05 | 1.24E-03 | 6.46E-03 |
|         | Pred | 0.61             | 0.04               | 0.43               | 1                  | 2.34E-02   | 9.13E-04 | 9.52E-02 | 5.76E-01 | 2.06E-03 | 8.03E-05 | 8.37E-03 | 5.07E-02 |
| A158B   | Expr | 0.75             | 0.02               | 0.18               | 0.73               | 3.49E-02   | 6.32E-04 | 6.10E-03 | 3.23E-02 | 3.07E-03 | 5.56E-05 | 5.37E-04 | 2.84E-03 |
|         | Pred | 0.97             | 0.03               | 0.2                | 0.7                | 8.91E-02   | 6.35E-04 | 6.91E-03 | 3.01E-02 | 7.84E-03 | 5.59E-05 | 6.08E-04 | 2.65E-03 |
| R160A   | Expr | 0.49             | 0.49               | 0.87               | 1                  | 1.67E-02   | 1.69E-02 | 2.27E-01 | 5.76E-01 | 1.31E-03 | 1.33E-03 | 1.78E-02 | 4.52E-02 |
|         | Pred | 0.5              | 0.5                | 0.7                | 1                  | 1.74E-02   | 1.75E-02 | 5.73E-02 | 5.76E-01 | 1.37E-03 | 1.38E-03 | 4.50E-03 | 4.52E-02 |
| R160B   | Expr | 0.33             | 0.11               | 0.79               | 1                  | 1.02E-02   | 2.78E-03 | 2.49E-01 | 5.76E-01 | 8.01E-04 | 2.18E-04 | 1.96E-02 | 4.52E-02 |
|         | Pred | 0.25             | 0.05               | 0.4                | 0.73               | 7.10E-03   | 1.27E-03 | 1.41E-02 | 3.23E-02 | 5.58E-04 | 9.95E-05 | 1.11E-03 | 2.54E-03 |
| T161A   | Expr | 0.91             | 0.96               | 1                  | 1                  | 5.96E-02   | 8.35E-02 | 4.64E-01 | 5.76E-01 | 2.46E-03 | 3.44E-03 | 1.91E-02 | 2.37E-02 |
|         | Pred | 0.94             | 0.94               | 0.99               | 1                  | 7.10E-02   | 6.89E-02 | 5.28E-01 | 5.76E-01 | 2.93E-03 | 2.84E-03 | 2.18E-02 | 2.37E-02 |
| T161B   | Expr | 0.84             | 0.96               | 1                  | 1                  | 4.60E-02   | 8.11E-02 | 5.52E-01 | 5.76E-01 | 1.90E-03 | 3.35E-03 | 2.28E-02 | 2.37E-02 |
|         | Pred | 0.6              | 0.55               | 0.84               | 1                  | 2.31E-02   | 2.00E-02 | 1.96E-01 | 5.76E-01 | 9.51E-04 | 8.25E-04 | 8.06E-03 | 2.37E-02 |
| H162A   | Expr | 0.96             | 0.68               | 0.93               | 1                  | 8.31E-02   | 2.86E-02 | 2.86E-01 | 5.76E-01 | 1.93E-03 | 6.63E-04 | 6.63E-03 | 1.33E-02 |
|         | Pred | 1                | 0.54               | 0.84               | 1                  | 5.76E-01   | 1.93E-02 | 2.91E-01 | 5.76E-01 | 1.33E-02 | 4.47E-04 | 6.75E-03 | 1.33E-02 |
| H162B   | Expr | 0.98             | 0.62               | 0.92               | 1                  | 1.05E-01   | 2.44E-02 | 3.50E-01 | 5.76E-01 | 2.42E-03 | 5.66E-04 | 8.11E-03 | 1.33E-02 |
|         | Pred | 0.87             | 0.24               | 0.46               | 0.92               | 5.09E-02   | 6.85E-03 | 1.69E-02 | 6.25E-02 | 1.18E-03 | 1.59E-04 | 3.92E-04 | 1.45E-03 |
| L163A   | Expr | 0.96             | 0.77               | 0.98               | 1                  | 8.31E-02   | 3.64E-02 | 3.68E-01 | 5.76E-01 | 8.55E-03 | 3.74E-03 | 3.79E-02 | 5.92E-02 |
|         | Pred | 1                | 0.55               | 0.93               | 1                  | 5.76E-01   | 2.01E-02 | 4.21E-01 | 5.76E-01 | 5.92E-02 | 2.06E-03 | 4.33E-02 | 5.92E-02 |
| L163B   | Expr | 1                | 1                  | 1                  | 1                  | 5.76E-01   | 5.76E-01 | 5.76E-01 | 5.76E-01 | 5.92E-02 | 5.92E-02 | 5.92E-02 | 5.92E-02 |
|         | Pred | 1                | 0.66               | 0.96               | 1                  | 5.76E-01   | 2.71E-02 | 4.54E-01 | 5.76E-01 | 5.92E-02 | 2.79E-03 | 4.67E-02 | 5.92E-02 |
| A164A   | Expr | 0.96             | 0.9                | 0.99               | 1                  | 8.31E-02   | 5.75E-02 | 4.14E-01 | 5.76E-01 | 7.85E-03 | 5.43E-03 | 3.91E-02 | 5.44E-02 |
|         | Pred | 1                | 0.74               | 0.95               | 1                  | 5.76E-01   | 3.33E-02 | 3.56E-01 | 5.76E-01 | 5.44E-02 | 3.15E-03 | 3.36E-02 | 5.44E-02 |
| A164B   | Expr | 1                | 0.99               | 1                  | 1                  | 5.76E-01   | 1.20E-01 | 5.54E-01 | 5.76E-01 | 5.44E-02 | 1.14E-02 | 5.23E-02 | 5.44E-02 |
|         | Pred | 0.95             | 0.69               | 0.98               | 1                  | 7.28E-02   | 2.91E-02 | 4.78E-01 | 5.76E-01 | 6.88E-03 | 2.75E-03 | 4.52E-02 | 5.44E-02 |
| Y166A   | Expr | 0.96             | 0.96               | 1                  | 1                  | 8.31E-02   | 8.35E-02 | 4.64E-01 | 5.76E-01 | 1.57E-02 | 1.57E-02 | 8.75E-02 | 1.09E-01 |
|         | Pred | 1                | 0.74               | 0.95               | 1                  | 5.76E-01   | 3.34E-02 | 3.56E-01 | 5.76E-01 | 1.09E-01 | 6.29E-03 | 6.72E-02 | 1.09E-01 |
| Y166B   | Expr | 0.99             | 1                  | 1                  | 1                  | 1.10E-01   | 5.76E-01 | 5.76E-01 | 5.76E-01 | 2.07E-02 | 1.09E-01 | 1.09E-01 | 1.09E-01 |
|         | Pred | 0.86             | 0.79               | 0.99               | 1                  | 4.93E-02   | 3.96E-02 | 5.50E-01 | 5.76E-01 | 9.30E-03 | 7.47E-03 | 1.04E-01 | 1.09E-01 |
| S167A   | Expr | 0.96             | 0.63               | 0.94               | 1                  | 8.31E-02   | 2.50E-02 | 2.90E-01 | 5.76E-01 | 1.84E-03 | 5.54E-04 | 6.42E-03 | 1.27E-02 |
|         | Pred | 1                | 0.25               | 0.81               | 1                  | 5.76E-01   | 7.29E-03 | 2.67E-01 | 5.76E-01 | 1.27E-02 | 1.62E-04 | 5.90E-03 | 1.27E-02 |
| S167B   | Expr | 1                | 0.98               | 1                  | 1                  | 5.76E-01   | 9.50E-02 | 5.10E-01 | 5.76E-01 | 1.27E-02 | 2.10E-03 | 1.13E-02 | 1.27E-02 |

| Residue |      | $D_o^i$          |                    |                    |                    | $k_{xc}^i$ |          |          |          | $K_u^i$  |          |          |          |
|---------|------|------------------|--------------------|--------------------|--------------------|------------|----------|----------|----------|----------|----------|----------|----------|
|         |      | DSH <sup>a</sup> | min <sup>b,c</sup> | avg <sup>b,d</sup> | max <sup>b,e</sup> | DSH        | min      | avg      | max      | DSH      | min      | avg      | max      |
| D168A   | Pred | 1                | 0.5                | 0.79               | 1                  | 5.76E-01   | 1.72E-02 | 1.44E-01 | 5.76E-01 | 1.27E-02 | 3.80E-04 | 3.19E-03 | 1.27E-02 |
| D168A   | Expr | 0.96             | 0.12               | 0.7                | 1                  | 8.31E-02   | 3.09E-03 | 9.51E-02 | 5.76E-01 | 4.82E-03 | 1.79E-04 | 5.52E-03 | 3.34E-02 |
| D168B   | Pred | 1                | 0.05               | 0.59               | 1                  | 5.76E-01   | 1.28E-03 | 1.05E-01 | 5.76E-01 | 3.34E-02 | 7.44E-05 | 6.10E-03 | 3.34E-02 |
| D168B   | Expr | 1                | 0.11               | 0.86               | 1                  | 5.76E-01   | 2.88E-03 | 3.72E-01 | 5.76E-01 | 3.34E-02 | 1.67E-04 | 2.16E-02 | 3.34E-02 |
| E169A   | Pred | 0.97             | 0.05               | 0.55               | 0.98               | 9.11E-02   | 1.28E-03 | 2.63E-02 | 9.69E-02 | 5.28E-03 | 7.44E-05 | 1.52E-03 | 5.63E-03 |
| E169A   | Expr | 0.96             | 0.84               | 0.98               | 1                  | 8.31E-02   | 4.51E-02 | 3.68E-01 | 5.76E-01 | 2.35E-02 | 1.28E-02 | 1.04E-01 | 1.63E-01 |
| E169B   | Pred | 1                | 0.66               | 0.91               | 1                  | 5.76E-01   | 2.72E-02 | 2.77E-01 | 5.76E-01 | 1.63E-01 | 7.71E-03 | 7.84E-02 | 1.63E-01 |
| E169B   | Expr | 0.99             | 0.33               | 0.82               | 1                  | 1.09E-01   | 1.01E-02 | 2.45E-01 | 5.76E-01 | 3.07E-02 | 2.85E-03 | 6.93E-02 | 1.63E-01 |
| L170A   | Pred | 0.86             | 0.13               | 0.47               | 0.84               | 4.91E-02   | 3.55E-03 | 1.79E-02 | 4.53E-02 | 1.39E-02 | 1.00E-03 | 5.07E-03 | 1.28E-02 |
| L170A   | Expr | 0.65             | 0.18               | 0.38               | 0.59               | 2.63E-02   | 4.95E-03 | 1.26E-02 | 2.21E-02 | 8.19E-03 | 1.54E-03 | 3.92E-03 | 6.89E-03 |
| L170B   | Pred | 1                | 0.03               | 0.31               | 0.85               | 5.76E-01   | 8.87E-04 | 1.13E-02 | 4.73E-02 | 1.80E-01 | 2.77E-04 | 3.52E-03 | 1.48E-02 |
| L170B   | Expr | 0.65             | 0.18               | 0.35               | 0.69               | 2.59E-02   | 5.05E-03 | 1.21E-02 | 2.89E-02 | 8.09E-03 | 1.58E-03 | 3.76E-03 | 9.02E-03 |
| R171A   | Pred | 0.83             | 0.04               | 0.19               | 1                  | 4.42E-02   | 9.98E-04 | 3.16E-02 | 5.76E-01 | 1.38E-02 | 3.11E-04 | 9.86E-03 | 1.80E-01 |
| R171A   | Expr | 0.73             | 0.73               | 0.98               | 1                  | 3.31E-02   | 3.27E-02 | 4.80E-01 | 5.76E-01 | 2.60E-03 | 2.57E-03 | 3.77E-02 | 4.52E-02 |
| R171B   | Pred | 0.66             | 0.8                | 0.99               | 1                  | 2.67E-02   | 4.01E-02 | 5.06E-01 | 5.76E-01 | 2.10E-03 | 3.15E-03 | 3.98E-02 | 4.52E-02 |
| R171B   | Expr | 0.78             | 0.59               | 0.95               | 1                  | 3.84E-02   | 2.22E-02 | 3.83E-01 | 5.76E-01 | 3.02E-03 | 1.75E-03 | 3.01E-02 | 4.52E-02 |
| Q172A   | Pred | 1                | 0.6                | 0.96               | 1                  | 5.76E-01   | 2.28E-02 | 4.52E-01 | 5.76E-01 | 4.52E-02 | 1.79E-03 | 3.55E-02 | 4.52E-02 |
| Q172A   | Expr | 1                | 0.03               | 0.19               | 0.97               | 5.76E-01   | 7.80E-04 | 8.99E-03 | 8.39E-02 | 1.76E-02 | 2.38E-05 | 2.75E-04 | 2.57E-03 |
| Q172B   | Pred | 1                | 0.03               | 0.19               | 1                  | 5.76E-01   | 6.98E-04 | 5.78E-02 | 5.76E-01 | 1.76E-02 | 2.13E-05 | 1.77E-03 | 1.76E-02 |
| Q172B   | Expr | 0.53             | 0.02               | 0.23               | 0.63               | 1.91E-02   | 5.02E-04 | 7.69E-03 | 2.45E-02 | 5.84E-04 | 1.54E-05 | 2.35E-04 | 7.50E-04 |
| R173A   | Pred | 0.66             | 0.02               | 0.21               | 0.78               | 2.68E-02   | 4.89E-04 | 7.39E-03 | 3.78E-02 | 8.19E-04 | 1.50E-05 | 2.26E-04 | 1.16E-03 |
| R173A   | Expr | 0.96             | 0.74               | 0.98               | 1                  | 7.80E-02   | 3.36E-02 | 4.57E-01 | 5.76E-01 | 2.38E-03 | 1.03E-03 | 1.40E-02 | 1.76E-02 |
| R173B   | Pred | 0.81             | 0.78               | 0.96               | 1                  | 4.21E-02   | 3.75E-02 | 4.50E-01 | 5.76E-01 | 1.29E-03 | 1.15E-03 | 1.38E-02 | 1.76E-02 |
| R173B   | Expr | 0.71             | 0.35               | 0.91               | 1                  | 3.07E-02   | 1.06E-02 | 2.62E-01 | 5.76E-01 | 9.39E-04 | 3.25E-04 | 8.02E-03 | 1.76E-02 |
| L174A   | Pred | 0.88             | 0.35               | 0.88               | 1                  | 5.33E-02   | 1.06E-02 | 2.73E-01 | 5.76E-01 | 1.63E-03 | 3.26E-04 | 8.35E-03 | 1.76E-02 |
| L174A   | Expr | 0.19             | 0.25               | 0.55               | 0.83               | 5.28E-03   | 7.07E-03 | 2.12E-02 | 4.47E-02 | 7.05E-04 | 9.44E-04 | 2.83E-03 | 5.96E-03 |
| L174B   | Pred | 0.17             | 0.19               | 0.38               | 0.81               | 4.59E-03   | 5.24E-03 | 1.27E-02 | 4.10E-02 | 6.13E-04 | 7.00E-04 | 1.70E-03 | 5.47E-03 |
| L174B   | Expr | 0.78             | 0.3                | 0.71               | 0.94               | 3.74E-02   | 8.83E-03 | 3.53E-02 | 7.19E-02 | 4.99E-03 | 1.18E-03 | 4.71E-03 | 9.60E-03 |
| A175A   | Pred | 1                | 0.13               | 0.57               | 0.95               | 5.76E-01   | 3.45E-03 | 2.76E-02 | 7.50E-02 | 7.68E-02 | 4.60E-04 | 3.69E-03 | 1.00E-02 |
| A175A   | Expr | 1                | 0.51               | 0.86               | 1                  | 5.76E-01   | 1.80E-02 | 1.99E-01 | 5.76E-01 | 5.44E-02 | 1.70E-03 | 1.88E-02 | 5.44E-02 |
| A175B   | Pred | 1                | 0.47               | 0.73               | 1                  | 5.76E-01   | 1.60E-02 | 1.11E-01 | 5.76E-01 | 5.44E-02 | 1.51E-03 | 1.05E-02 | 5.44E-02 |
| A175B   | Expr | 0.73             | 0.24               | 0.85               | 1                  | 3.30E-02   | 6.98E-03 | 3.44E-01 | 5.76E-01 | 3.12E-03 | 6.60E-04 | 3.25E-02 | 5.44E-02 |
| A176A   | Pred | 0.96             | 0.15               | 0.8                | 1                  | 7.82E-02   | 4.02E-03 | 3.16E-01 | 5.76E-01 | 7.39E-03 | 3.80E-04 | 2.98E-02 | 5.44E-02 |
| A176A   | Expr | 0.45             | 0.28               | 0.57               | 0.86               | 1.51E-02   | 8.05E-03 | 2.31E-02 | 4.98E-02 | 8.78E-04 | 4.69E-04 | 1.35E-03 | 2.90E-03 |
| A176B   | Pred | 0.32             | 0.18               | 0.47               | 0.76               | 9.49E-03   | 4.85E-03 | 1.72E-02 | 3.59E-02 | 5.53E-04 | 2.83E-04 | 1.00E-03 | 2.09E-03 |
| A176B   | Expr | 0.55             | 0.47               | 0.92               | 1                  | 1.98E-02   | 1.58E-02 | 4.02E-01 | 5.76E-01 | 1.15E-03 | 9.22E-04 | 2.34E-02 | 3.35E-02 |
| R177A   | Pred | 0.71             | 0.46               | 0.83               | 1                  | 3.12E-02   | 1.52E-02 | 2.90E-01 | 5.76E-01 | 1.82E-03 | 8.87E-04 | 1.69E-02 | 3.35E-02 |
| R177A   | Expr | 0.04             | 0.05               | 0.71               | 1                  | 9.34E-04   | 1.21E-03 | 1.38E-01 | 5.76E-01 | 4.53E-05 | 5.89E-05 | 6.69E-03 | 2.79E-02 |
| R177B   | Pred | 0.03             | 0.05               | 0.64               | 1                  | 8.74E-04   | 1.18E-03 | 8.36E-02 | 5.76E-01 | 4.23E-05 | 5.73E-05 | 4.05E-03 | 2.79E-02 |
| R177B   | Expr | 0.77             | 0.62               | 0.9                | 1                  | 3.63E-02   | 2.41E-02 | 3.23E-01 | 5.76E-01 | 1.76E-03 | 1.17E-03 | 1.57E-02 | 2.79E-02 |
| L178A   | Pred | 1                | 0.46               | 0.83               | 1                  | 5.76E-01   | 1.53E-02 | 3.15E-01 | 5.76E-01 | 2.79E-02 | 7.39E-04 | 1.52E-02 | 2.79E-02 |
| L178A   | Expr | 0.72             | 0.44               | 0.91               | 1                  | 3.18E-02   | 1.43E-02 | 2.34E-01 | 5.76E-01 | 4.24E-03 | 1.91E-03 | 3.13E-02 | 7.68E-02 |
|         | Pred | 0.48             | 0.36               | 0.9                | 1                  | 1.64E-02   | 1.13E-02 | 1.40E-01 | 5.76E-01 | 2.19E-03 | 1.51E-03 | 1.87E-02 | 7.68E-02 |

| Residue |      | $D_o^i$          |                    |                    |                    | $k_{xc}^i$ |          |          |          | $K_u^i$  |          |          |          |
|---------|------|------------------|--------------------|--------------------|--------------------|------------|----------|----------|----------|----------|----------|----------|----------|
|         |      | DSH <sup>a</sup> | min <sup>b,c</sup> | avg <sup>b,d</sup> | max <sup>b,e</sup> | DSH        | min      | avg      | max      | DSH      | min      | avg      | max      |
| L178B   | Expr | 0.79             | 0.08               | 0.23               | 0.78               | 3.88E-02   | 2.12E-03 | 8.01E-03 | 3.80E-02 | 5.18E-03 | 2.83E-04 | 1.07E-03 | 5.07E-03 |
|         | Pred | 0.82             | 0.03               | 0.18               | 0.85               | 4.24E-02   | 8.00E-04 | 6.64E-03 | 4.78E-02 | 5.66E-03 | 1.07E-04 | 8.86E-04 | 6.38E-03 |
| E179A   | Expr | 0.9              | 0.53               | 0.84               | 1                  | 5.74E-02   | 1.87E-02 | 1.70E-01 | 5.76E-01 | 1.74E-02 | 5.67E-03 | 5.17E-02 | 1.75E-01 |
|         | Pred | 1                | 0.47               | 0.81               | 1                  | 5.76E-01   | 1.59E-02 | 2.15E-01 | 5.76E-01 | 1.75E-01 | 4.83E-03 | 6.55E-02 | 1.75E-01 |
| E179B   | Expr | 1                | 0.76               | 0.97               | 1                  | 5.76E-01   | 3.54E-02 | 4.75E-01 | 5.76E-01 | 1.75E-01 | 1.08E-02 | 1.45E-01 | 1.75E-01 |
|         | Pred | 0.92             | 0.46               | 0.77               | 1                  | 6.24E-02   | 1.54E-02 | 1.13E-01 | 5.76E-01 | 1.90E-02 | 4.69E-03 | 3.43E-02 | 1.75E-01 |
| A180A   | Expr | 0.9              | 0.14               | 0.51               | 0.98               | 5.74E-02   | 3.76E-03 | 2.35E-02 | 9.73E-02 | 4.71E-03 | 3.09E-04 | 1.93E-03 | 7.98E-03 |
|         | Pred | 1                | 0.04               | 0.53               | 1                  | 5.76E-01   | 1.05E-03 | 7.67E-02 | 5.76E-01 | 4.72E-02 | 8.61E-05 | 6.29E-03 | 4.72E-02 |
| A180B   | Expr | 0.32             | 0.24               | 0.94               | 1                  | 9.71E-03   | 6.76E-03 | 4.73E-01 | 5.76E-01 | 7.97E-04 | 5.55E-04 | 3.88E-02 | 4.72E-02 |
|         | Pred | 0.31             | 0.09               | 0.69               | 1                  | 9.12E-03   | 2.32E-03 | 5.78E-02 | 5.76E-01 | 7.48E-04 | 1.91E-04 | 4.74E-03 | 4.72E-02 |
| K182A   | Expr | 0.93             | 0.82               | 0.98               | 1                  | 6.59E-02   | 4.24E-02 | 5.00E-01 | 5.76E-01 | 6.83E-03 | 4.39E-03 | 5.18E-02 | 5.96E-02 |
|         | Pred | 0.88             | 0.28               | 0.66               | 0.85               | 5.35E-02   | 8.28E-03 | 2.86E-02 | 4.69E-02 | 5.54E-03 | 8.58E-04 | 2.97E-03 | 4.86E-03 |
| K182B   | Expr | 1                | 0.26               | 0.82               | 1                  | 5.76E-01   | 7.61E-03 | 3.89E-01 | 5.76E-01 | 5.96E-02 | 7.89E-04 | 4.03E-02 | 5.96E-02 |
|         | Pred | 0.84             | 0.03               | 0.22               | 0.63               | 4.64E-02   | 8.11E-04 | 7.02E-03 | 2.47E-02 | 4.81E-03 | 8.40E-05 | 7.28E-04 | 2.56E-03 |
| E183A   | Expr | 1                | 1                  | 1                  | 1                  | 5.76E-01   | 5.76E-01 | 5.76E-01 | 5.76E-01 | 8.19E-02 | 8.19E-02 | 8.19E-02 | 8.19E-02 |
|         | Pred | 0.95             | 0.57               | 0.78               | 1                  | 7.71E-02   | 2.11E-02 | 6.79E-02 | 5.76E-01 | 1.10E-02 | 3.00E-03 | 9.66E-03 | 8.19E-02 |
| E183B   | Expr | 1                | 1                  | 1                  | 1                  | 5.76E-01   | 5.76E-01 | 5.76E-01 | 5.76E-01 | 8.19E-02 | 8.19E-02 | 8.19E-02 | 8.19E-02 |
|         | Pred | 0.74             | 0.59               | 0.78               | 1                  | 3.39E-02   | 2.21E-02 | 8.89E-02 | 5.76E-01 | 4.82E-03 | 3.14E-03 | 1.26E-02 | 8.19E-02 |
| N184A   | Expr | 0.7              | 0.05               | 0.31               | 1                  | 3.03E-02   | 1.29E-03 | 8.81E-02 | 5.76E-01 | 8.05E-04 | 3.42E-05 | 2.34E-03 | 1.53E-02 |
|         | Pred | 0.67             | 0.03               | 0.19               | 1                  | 2.75E-02   | 7.98E-04 | 3.34E-02 | 5.76E-01 | 7.31E-04 | 2.12E-05 | 8.87E-04 | 1.53E-02 |
| N184B   | Expr | 0.69             | 0.89               | 0.99               | 1                  | 2.90E-02   | 5.50E-02 | 5.51E-01 | 5.76E-01 | 7.70E-04 | 1.46E-03 | 1.46E-02 | 1.53E-02 |
|         | Pred | 0.55             | 0.32               | 0.63               | 0.8                | 1.98E-02   | 9.66E-03 | 2.65E-02 | 4.01E-02 | 5.24E-04 | 2.57E-04 | 7.04E-04 | 1.07E-03 |
| G185A   | Expr | 0.62             | 0.04               | 0.52               | 1                  | 2.44E-02   | 9.86E-04 | 1.74E-01 | 5.76E-01 | 3.65E-04 | 1.48E-05 | 2.60E-03 | 8.62E-03 |
|         | Pred | 0.6              | 0.03               | 0.21               | 0.69               | 2.28E-02   | 7.17E-04 | 6.75E-03 | 2.95E-02 | 3.42E-04 | 1.07E-05 | 1.01E-04 | 4.42E-04 |
| G185B   | Expr | 0.5              | 0.06               | 0.23               | 0.79               | 1.73E-02   | 1.63E-03 | 7.49E-03 | 3.89E-02 | 2.59E-04 | 2.44E-05 | 1.12E-04 | 5.83E-04 |
|         | Pred | 0.4              | 0.03               | 0.06               | 0.53               | 1.29E-02   | 7.13E-04 | 1.88E-03 | 1.91E-02 | 1.93E-04 | 1.07E-05 | 2.81E-05 | 2.86E-04 |
| G186A   | Expr | 0.76             | 0.88               | 0.99               | 1                  | 3.60E-02   | 5.21E-02 | 5.27E-01 | 5.76E-01 | 7.62E-04 | 1.10E-03 | 1.12E-02 | 1.22E-02 |
|         | Pred | 0.73             | 0.47               | 0.78               | 0.97               | 3.23E-02   | 1.60E-02 | 4.45E-02 | 8.86E-02 | 6.84E-04 | 3.39E-04 | 9.41E-04 | 1.87E-03 |
| G186B   | Expr | 1                | 0.98               | 1                  | 1                  | 5.76E-01   | 9.75E-02 | 5.53E-01 | 5.76E-01 | 1.22E-02 | 2.06E-03 | 1.17E-02 | 1.22E-02 |
|         | Pred | 1                | 0.06               | 0.45               | 0.9                | 5.76E-01   | 1.63E-03 | 1.64E-02 | 5.72E-02 | 1.22E-02 | 3.44E-05 | 3.48E-04 | 1.21E-03 |
| A187A   | Expr | 0.7              | 0.87               | 0.99               | 1                  | 2.98E-02   | 5.04E-02 | 5.51E-01 | 5.76E-01 | 1.18E-03 | 1.98E-03 | 2.17E-02 | 2.27E-02 |
|         | Pred | 0.66             | 0.44               | 0.83               | 1                  | 2.71E-02   | 1.46E-02 | 1.28E-01 | 5.76E-01 | 1.07E-03 | 5.73E-04 | 5.06E-03 | 2.27E-02 |
| A187B   | Expr | 1                | 1                  | 1                  | 1                  | 5.76E-01   | 5.76E-01 | 5.76E-01 | 5.76E-01 | 2.27E-02 | 2.27E-02 | 2.27E-02 | 2.27E-02 |
|         | Pred | 0.82             | 0.59               | 0.8                | 1                  | 4.29E-02   | 2.22E-02 | 1.19E-01 | 5.76E-01 | 1.69E-03 | 8.76E-04 | 4.69E-03 | 2.27E-02 |
| R188A   | Expr | 1                | 0.28               | 0.79               | 1                  | 5.76E-01   | 8.21E-03 | 2.39E-01 | 5.76E-01 | 2.79E-02 | 3.98E-04 | 1.16E-02 | 2.79E-02 |
|         | Pred | 0.96             | 0.03               | 0.21               | 0.63               | 8.06E-02   | 8.12E-04 | 6.35E-03 | 2.50E-02 | 3.91E-03 | 3.94E-05 | 3.08E-04 | 1.21E-03 |
| R188B   | Expr | 1                | 0.38               | 0.97               | 1                  | 5.76E-01   | 1.20E-02 | 5.49E-01 | 5.76E-01 | 2.79E-02 | 5.80E-04 | 2.66E-02 | 2.79E-02 |
|         | Pred | 0.82             | 0.27               | 0.69               | 0.86               | 4.33E-02   | 7.71E-03 | 3.17E-02 | 4.98E-02 | 2.10E-03 | 3.73E-04 | 1.54E-03 | 2.41E-03 |
| L189A   | Expr | 1                | 0.82               | 0.99               | 1                  | 5.76E-01   | 4.23E-02 | 5.27E-01 | 5.76E-01 | 7.68E-02 | 5.65E-03 | 7.04E-02 | 7.68E-02 |
|         | Pred | 1                | 0.39               | 0.67               | 0.99               | 5.76E-01   | 1.23E-02 | 3.46E-02 | 1.14E-01 | 7.68E-02 | 1.64E-03 | 4.61E-03 | 1.53E-02 |
| L189B   | Expr | 0.53             | 0.12               | 0.34               | 1                  | 1.87E-02   | 3.24E-03 | 6.24E-02 | 5.76E-01 | 2.50E-03 | 4.33E-04 | 8.33E-03 | 7.68E-02 |
|         | Pred | 0.39             | 0.03               | 0.09               | 0.42               | 1.22E-02   | 7.05E-04 | 2.61E-03 | 1.35E-02 | 1.63E-03 | 9.41E-05 | 3.48E-04 | 1.80E-03 |
| E191A   | Expr | 0.95             | 0.33               | 0.84               | 1                  | 7.45E-02   | 1.00E-02 | 1.07E-01 | 5.76E-01 | 1.40E-02 | 1.88E-03 | 2.01E-02 | 1.08E-01 |

| Residue |      | $D_0^i$          |                    |                    |                    | $k_{xc}^i$ |          |          |          | $K_u^i$  |          |          |          |
|---------|------|------------------|--------------------|--------------------|--------------------|------------|----------|----------|----------|----------|----------|----------|----------|
|         |      | DSH <sup>a</sup> | min <sup>b,c</sup> | avg <sup>b,d</sup> | max <sup>b,e</sup> | DSH        | min      | avg      | max      | DSH      | min      | avg      | max      |
| E191B   | Pred | 0.74             | 0.28               | 0.67               | 0.9                | 3.39E-02   | 8.19E-03 | 3.12E-02 | 5.87E-02 | 6.35E-03 | 1.54E-03 | 5.85E-03 | 1.10E-02 |
| E191B   | Expr | 1                | 0.89               | 0.99               | 1                  | 5.76E-01   | 5.60E-02 | 5.51E-01 | 5.76E-01 | 1.08E-01 | 1.05E-02 | 1.03E-01 | 1.08E-01 |
| E191B   | Pred | 1                | 0.65               | 0.83               | 1                  | 5.76E-01   | 2.66E-02 | 1.19E-01 | 5.76E-01 | 1.08E-01 | 4.98E-03 | 2.24E-02 | 1.08E-01 |
| Y192A   | Expr | 0.49             | 0.02               | 0.25               | 0.82               | 1.70E-02   | 5.73E-04 | 9.22E-03 | 4.28E-02 | 2.60E-03 | 8.75E-05 | 1.41E-03 | 6.54E-03 |
| Y192A   | Pred | 0.39             | 0.02               | 0.21               | 0.58               | 1.25E-02   | 5.65E-04 | 6.56E-03 | 2.19E-02 | 1.92E-03 | 8.63E-05 | 1.00E-03 | 3.34E-03 |
| Y192B   | Expr | 0.88             | 0.08               | 0.67               | 1                  | 5.29E-02   | 2.05E-03 | 5.99E-02 | 5.76E-01 | 8.08E-03 | 3.13E-04 | 9.16E-03 | 8.80E-02 |
| Y192B   | Pred | 0.6              | 0.03               | 0.31               | 0.56               | 2.32E-02   | 7.80E-04 | 9.98E-03 | 2.03E-02 | 3.55E-03 | 1.19E-04 | 1.52E-03 | 3.10E-03 |
| H193A   | Expr | 0.94             | 0.64               | 0.93               | 1                  | 7.04E-02   | 2.55E-02 | 2.17E-01 | 5.76E-01 | 2.30E-03 | 8.34E-04 | 7.12E-03 | 1.88E-02 |
| H193A   | Pred | 0.73             | 0.51               | 0.76               | 0.99               | 3.28E-02   | 1.77E-02 | 4.10E-02 | 1.07E-01 | 1.07E-03 | 5.79E-04 | 1.34E-03 | 3.52E-03 |
| H193B   | Expr | 0.94             | 0.54               | 0.9                | 1                  | 6.99E-02   | 1.97E-02 | 2.79E-01 | 5.76E-01 | 2.29E-03 | 6.44E-04 | 9.14E-03 | 1.88E-02 |
| H193B   | Pred | 0.69             | 0.26               | 0.52               | 0.83               | 2.93E-02   | 7.57E-03 | 2.02E-02 | 4.36E-02 | 9.59E-04 | 2.48E-04 | 6.63E-04 | 1.43E-03 |
| A194A   | Expr | 0.87             | 0.79               | 0.95               | 1                  | 5.06E-02   | 3.91E-02 | 3.10E-01 | 5.76E-01 | 1.37E-03 | 1.06E-03 | 8.39E-03 | 1.56E-02 |
| A194A   | Pred | 0.64             | 0.61               | 0.81               | 1                  | 2.58E-02   | 2.36E-02 | 1.17E-01 | 5.76E-01 | 6.98E-04 | 6.38E-04 | 3.17E-03 | 1.56E-02 |
| A194B   | Expr | 1                | 0.96               | 1                  | 1                  | 5.76E-01   | 7.86E-02 | 5.52E-01 | 5.76E-01 | 1.56E-02 | 2.13E-03 | 1.49E-02 | 1.56E-02 |
| A194B   | Pred | 0.92             | 0.42               | 0.91               | 1                  | 6.30E-02   | 1.36E-02 | 3.51E-01 | 5.76E-01 | 1.71E-03 | 3.67E-04 | 9.50E-03 | 1.56E-02 |
| K195A   | Expr | 0.81             | 0.5                | 0.87               | 1                  | 4.14E-02   | 1.74E-02 | 2.30E-01 | 5.76E-01 | 2.64E-03 | 1.11E-03 | 1.47E-02 | 3.68E-02 |
| K195A   | Pred | 0.59             | 0.34               | 0.73               | 1                  | 2.25E-02   | 1.02E-02 | 1.40E-01 | 5.76E-01 | 1.44E-03 | 6.54E-04 | 8.96E-03 | 3.68E-02 |
| K195B   | Expr | 0.81             | 0.44               | 0.97               | 1                  | 4.16E-02   | 1.44E-02 | 5.49E-01 | 5.76E-01 | 2.66E-03 | 9.18E-04 | 3.51E-02 | 3.68E-02 |
| K195B   | Pred | 0.54             | 0.26               | 0.93               | 1                  | 1.95E-02   | 7.66E-03 | 4.00E-01 | 5.76E-01 | 1.24E-03 | 4.89E-04 | 2.56E-02 | 3.68E-02 |
| A196A   | Expr | 0.22             | 0.5                | 0.95               | 1                  | 6.19E-03   | 1.75E-02 | 4.28E-01 | 5.76E-01 | 2.74E-04 | 7.71E-04 | 1.89E-02 | 2.54E-02 |
| A196A   | Pred | 0.19             | 0.4                | 0.89               | 1                  | 5.19E-03   | 1.29E-02 | 3.47E-01 | 5.76E-01 | 2.29E-04 | 5.68E-04 | 1.53E-02 | 2.54E-02 |
| A196B   | Expr | 0.57             | 0.04               | 0.11               | 0.81               | 2.14E-02   | 9.92E-04 | 3.87E-03 | 4.21E-02 | 9.45E-04 | 4.38E-05 | 1.71E-04 | 1.86E-03 |
| A196B   | Pred | 0.44             | 0.03               | 0.07               | 0.45               | 1.44E-02   | 7.15E-04 | 1.92E-03 | 1.47E-02 | 6.35E-04 | 3.16E-05 | 8.49E-05 | 6.52E-04 |
| T197A   | Expr | 0.88             | 0.56               | 0.92               | 1                  | 5.38E-02   | 2.03E-02 | 3.78E-01 | 5.76E-01 | 3.68E-03 | 1.39E-03 | 2.58E-02 | 3.94E-02 |
| T197A   | Pred | 0.66             | 0.37               | 0.83               | 1                  | 2.72E-02   | 1.14E-02 | 1.99E-01 | 5.76E-01 | 1.86E-03 | 7.79E-04 | 1.36E-02 | 3.94E-02 |
| T197B   | Expr | 0.96             | 0.12               | 0.7                | 1                  | 8.03E-02   | 3.22E-03 | 1.37E-01 | 5.76E-01 | 5.49E-03 | 2.20E-04 | 9.39E-03 | 3.94E-02 |
| T197B   | Pred | 0.69             | 0.05               | 0.41               | 1                  | 2.96E-02   | 1.28E-03 | 4.04E-02 | 5.76E-01 | 2.03E-03 | 8.78E-05 | 2.76E-03 | 3.94E-02 |
| E198A   | Expr | 1                | 0.65               | 0.91               | 1                  | 5.76E-01   | 2.60E-02 | 2.40E-01 | 5.76E-01 | 6.81E-02 | 3.08E-03 | 2.84E-02 | 6.81E-02 |
| E198A   | Pred | 0.82             | 0.41               | 0.76               | 1                  | 4.29E-02   | 1.33E-02 | 9.79E-02 | 5.76E-01 | 5.08E-03 | 1.58E-03 | 1.16E-02 | 6.81E-02 |
| E198B   | Expr | 0.97             | 0.94               | 1                  | 1                  | 8.82E-02   | 7.14E-02 | 5.52E-01 | 5.76E-01 | 1.04E-02 | 8.45E-03 | 6.53E-02 | 6.81E-02 |
| E198B   | Pred | 0.71             | 0.65               | 0.88               | 1                  | 3.06E-02   | 2.63E-02 | 2.03E-01 | 5.76E-01 | 3.62E-03 | 3.11E-03 | 2.40E-02 | 6.81E-02 |
| H199A   | Expr | 0.33             | 0.12               | 0.48               | 1                  | 1.01E-02   | 3.21E-03 | 4.39E-02 | 5.76E-01 | 5.20E-04 | 1.66E-04 | 2.27E-03 | 2.98E-02 |
| H199A   | Pred | 0.28             | 0.11               | 0.39               | 0.89               | 8.21E-03   | 2.88E-03 | 1.45E-02 | 5.55E-02 | 4.25E-04 | 1.49E-04 | 7.49E-04 | 2.87E-03 |
| H199B   | Expr | 0.03             | 0.04               | 0.94               | 1                  | 8.55E-04   | 1.03E-03 | 3.64E-01 | 5.76E-01 | 4.42E-05 | 5.35E-05 | 1.88E-02 | 2.98E-02 |
| H199B   | Pred | 0.03             | 0.04               | 0.61               | 0.81               | 8.33E-04   | 9.61E-04 | 2.53E-02 | 4.21E-02 | 4.31E-05 | 4.97E-05 | 1.31E-03 | 2.18E-03 |
| L200A   | Expr | 0.83             | 0.05               | 0.55               | 0.93               | 4.41E-02   | 1.32E-03 | 2.36E-02 | 6.51E-02 | 4.54E-03 | 1.36E-04 | 2.43E-03 | 6.70E-03 |
| L200A   | Pred | 0.6              | 0.05               | 0.43               | 0.74               | 2.27E-02   | 1.28E-03 | 1.54E-02 | 3.41E-02 | 2.34E-03 | 1.32E-04 | 1.58E-03 | 3.51E-03 |
| L200B   | Expr | 0.43             | 0.03               | 0.1                | 0.52               | 1.39E-02   | 8.19E-04 | 3.07E-03 | 1.86E-02 | 1.43E-03 | 8.42E-05 | 3.16E-04 | 1.91E-03 |
| L200B   | Pred | 0.33             | 0.02               | 0.07               | 0.43               | 1.01E-02   | 6.09E-04 | 1.95E-03 | 1.41E-02 | 1.04E-03 | 6.26E-05 | 2.01E-04 | 1.45E-03 |
| S201A   | Expr | 0.7              | 0.58               | 0.7                | 0.78               | 3.01E-02   | 2.17E-02 | 3.01E-02 | 3.78E-02 | 1.21E-03 | 8.76E-04 | 1.21E-03 | 1.52E-03 |
| S201A   | Pred | 1                | 0.57               | 0.81               | 1                  | 5.76E-01   | 2.09E-02 | 9.30E-02 | 5.76E-01 | 2.32E-02 | 8.42E-04 | 3.75E-03 | 2.32E-02 |
| S201B   | Expr | 0.74             | 0.41               | 0.64               | 0.73               | 3.34E-02   | 1.34E-02 | 2.58E-02 | 3.24E-02 | 1.35E-03 | 5.40E-04 | 1.04E-03 | 1.30E-03 |
| S201B   | Pred | 0.96             | 0.26               | 0.61               | 1                  | 7.99E-02   | 7.41E-03 | 5.23E-02 | 5.76E-01 | 3.22E-03 | 2.99E-04 | 2.11E-03 | 2.32E-02 |



| Residue |      | DSH <sup>a</sup> | $D_o^i$            |                    |                    | DSH      | $k_{xc}^i$ |          |          | DSH      | $K_u^i$  |          |          |
|---------|------|------------------|--------------------|--------------------|--------------------|----------|------------|----------|----------|----------|----------|----------|----------|
|         |      |                  | min <sup>b,c</sup> | avg <sup>b,d</sup> | max <sup>b,e</sup> |          | min        | avg      | max      |          | min      | avg      | max      |
| T202A   | Expr | 0.61             | 0.2                | 0.52               | 0.71               | 2.37E-02 | 5.67E-03   | 1.97E-02 | 3.13E-02 | 8.14E-04 | 1.95E-04 | 6.75E-04 | 1.07E-03 |
|         | Pred | 0.73             | 0.21               | 0.56               | 0.84               | 3.24E-02 | 5.83E-03   | 2.34E-02 | 4.62E-02 | 1.11E-03 | 2.00E-04 | 8.02E-04 | 1.58E-03 |
| T202B   | Expr | 0.55             | 0.66               | 0.73               | 0.77               | 2.02E-02 | 2.67E-02   | 3.31E-02 | 3.63E-02 | 6.93E-04 | 9.17E-04 | 1.14E-03 | 1.25E-03 |
|         | Pred | 0.59             | 0.53               | 0.92               | 1                  | 2.21E-02 | 1.89E-02   | 2.82E-01 | 5.76E-01 | 7.57E-04 | 6.48E-04 | 9.69E-03 | 1.97E-02 |
| L203A   | Expr | 0.38             | 0.11               | 0.17               | 0.44               | 1.20E-02 | 2.79E-03   | 4.94E-03 | 1.45E-02 | 1.68E-03 | 3.90E-04 | 6.91E-04 | 2.03E-03 |
|         | Pred | 0.48             | 0.03               | 0.12               | 0.6                | 1.63E-02 | 7.34E-04   | 3.76E-03 | 2.29E-02 | 2.28E-03 | 1.03E-04 | 5.25E-04 | 3.20E-03 |
| L203B   | Expr | 0.13             | 0.12               | 0.18               | 0.43               | 3.34E-03 | 3.26E-03   | 5.24E-03 | 1.42E-02 | 4.67E-04 | 4.56E-04 | 7.32E-04 | 1.99E-03 |
|         | Pred | 0.04             | 0.04               | 0.1                | 0.41               | 1.05E-03 | 9.70E-04   | 2.98E-03 | 1.33E-02 | 1.46E-04 | 1.35E-04 | 4.17E-04 | 1.86E-03 |
| S204A   | Expr | 0.7              | 0.16               | 0.82               | 1                  | 2.98E-02 | 4.32E-03   | 2.21E-01 | 5.76E-01 | 1.20E-03 | 1.74E-04 | 8.92E-03 | 2.32E-02 |
|         | Pred | 0.63             | 0.03               | 0.5                | 0.92               | 2.51E-02 | 8.46E-04   | 2.27E-02 | 6.35E-02 | 1.01E-03 | 3.41E-05 | 9.13E-04 | 2.56E-03 |
| S204B   | Expr | 0.28             | 0.03               | 0.29               | 0.69               | 8.08E-03 | 7.76E-04   | 9.75E-03 | 2.92E-02 | 3.25E-04 | 3.13E-05 | 3.93E-04 | 1.18E-03 |
|         | Pred | 0.26             | 0.03               | 0.25               | 0.66               | 7.48E-03 | 7.66E-04   | 8.06E-03 | 2.69E-02 | 3.02E-04 | 3.09E-05 | 3.25E-04 | 1.08E-03 |
| E205A   | Expr | 0.98             | 0.8                | 0.98               | 1                  | 9.68E-02 | 4.08E-02   | 4.34E-01 | 5.76E-01 | 9.10E-03 | 3.83E-03 | 4.08E-02 | 5.41E-02 |
|         | Pred | 0.93             | 0.53               | 0.83               | 1                  | 6.66E-02 | 1.88E-02   | 1.54E-01 | 5.76E-01 | 6.26E-03 | 1.76E-03 | 1.45E-02 | 5.41E-02 |
| E205B   | Expr | 0.94             | 0.71               | 0.93               | 1                  | 7.21E-02 | 3.09E-02   | 1.70E-01 | 5.76E-01 | 6.78E-03 | 2.91E-03 | 1.60E-02 | 5.41E-02 |
|         | Pred | 1                | 0.67               | 0.89               | 1                  | 5.76E-01 | 2.78E-02   | 2.25E-01 | 5.76E-01 | 5.41E-02 | 2.61E-03 | 2.11E-02 | 5.41E-02 |
| K206A   | Expr | 0.41             | 0.43               | 0.9                | 1                  | 1.30E-02 | 1.41E-02   | 2.32E-01 | 5.76E-01 | 1.17E-03 | 1.27E-03 | 2.09E-02 | 5.18E-02 |
|         | Pred | 0.39             | 0.13               | 0.64               | 1                  | 1.25E-02 | 3.57E-03   | 5.63E-02 | 5.76E-01 | 1.12E-03 | 3.21E-04 | 5.07E-03 | 5.18E-02 |
| K206B   | Expr | 0.94             | 0.41               | 0.69               | 0.91               | 7.21E-02 | 1.31E-02   | 3.29E-02 | 6.01E-02 | 6.49E-03 | 1.18E-03 | 2.96E-03 | 5.41E-03 |
|         | Pred | 1                | 0.28               | 0.6                | 1                  | 5.76E-01 | 8.10E-03   | 5.00E-02 | 5.76E-01 | 5.18E-02 | 7.29E-04 | 4.50E-03 | 5.18E-02 |
| A207A   | Expr | 1                | 0.03               | 0.25               | 1                  | 5.76E-01 | 7.56E-04   | 3.46E-02 | 5.76E-01 | 2.54E-02 | 3.34E-05 | 1.53E-03 | 2.54E-02 |
|         | Pred | 1                | 0.03               | 0.2                | 0.99               | 5.76E-01 | 6.79E-04   | 1.09E-02 | 1.21E-01 | 2.54E-02 | 3.00E-05 | 4.83E-04 | 5.36E-03 |
| A207B   | Expr | 0.23             | 0.21               | 0.65               | 0.99               | 6.68E-03 | 6.04E-03   | 3.42E-02 | 1.08E-01 | 2.95E-04 | 2.67E-04 | 1.51E-03 | 4.78E-03 |
|         | Pred | 0.23             | 0.19               | 0.59               | 1                  | 6.55E-03 | 5.15E-03   | 7.67E-02 | 5.76E-01 | 2.89E-04 | 2.28E-04 | 3.39E-03 | 2.54E-02 |
| K208A   | Expr | 0.42             | 0.67               | 0.9                | 1                  | 1.38E-02 | 2.74E-02   | 2.28E-01 | 5.76E-01 | 8.83E-04 | 1.75E-03 | 1.45E-02 | 3.68E-02 |
|         | Pred | 0.4              | 0.19               | 0.62               | 1                  | 1.27E-02 | 5.14E-03   | 3.51E-02 | 1.90E-01 | 8.13E-04 | 3.28E-04 | 2.24E-03 | 1.21E-02 |
| K208B   | Expr | 0.5              | 0.59               | 0.87               | 1                  | 1.72E-02 | 2.23E-02   | 1.55E-01 | 5.76E-01 | 1.10E-03 | 1.42E-03 | 9.90E-03 | 3.68E-02 |
|         | Pred | 0.47             | 0.5                | 0.85               | 1                  | 1.58E-02 | 1.75E-02   | 2.93E-01 | 5.76E-01 | 1.01E-03 | 1.12E-03 | 1.87E-02 | 3.68E-02 |
| A210A   | Expr | 0.48             | 0.03               | 0.16               | 0.54               | 1.62E-02 | 7.14E-04   | 4.92E-03 | 1.93E-02 | 1.64E-03 | 7.23E-05 | 4.98E-04 | 1.95E-03 |
|         | Pred | 0.46             | 0.03               | 0.13               | 0.39               | 1.56E-02 | 6.83E-04   | 3.86E-03 | 1.24E-02 | 1.57E-03 | 6.92E-05 | 3.91E-04 | 1.25E-03 |
| A210B   | Expr | 0.8              | 0.68               | 0.92               | 1                  | 4.09E-02 | 2.83E-02   | 1.39E-01 | 5.76E-01 | 4.14E-03 | 2.87E-03 | 1.41E-02 | 5.83E-02 |
|         | Pred | 0.76             | 0.57               | 0.89               | 1                  | 3.57E-02 | 2.14E-02   | 3.22E-01 | 5.76E-01 | 3.61E-03 | 2.16E-03 | 3.26E-02 | 5.83E-02 |
| L211A   | Expr | 1                | 0.29               | 0.84               | 1                  | 1.45E-01 | 8.47E-03   | 2.95E-01 | 5.76E-01 | 3.21E-02 | 1.88E-03 | 6.52E-02 | 1.27E-01 |
|         | Pred | 0.96             | 0.04               | 0.59               | 1                  | 8.36E-02 | 1.09E-03   | 7.59E-02 | 5.76E-01 | 1.85E-02 | 2.42E-04 | 1.68E-02 | 1.27E-01 |
| L211B   | Expr | 0.91             | 0.03               | 0.33               | 1                  | 5.92E-02 | 7.93E-04   | 3.70E-02 | 5.76E-01 | 1.31E-02 | 1.76E-04 | 8.19E-03 | 1.27E-01 |
|         | Pred | 0.92             | 0.03               | 0.32               | 1                  | 6.16E-02 | 7.71E-04   | 3.64E-02 | 5.76E-01 | 1.37E-02 | 1.71E-04 | 8.06E-03 | 1.27E-01 |
| E212A   | Expr | 0.55             | 0.51               | 0.89               | 1                  | 2.01E-02 | 1.77E-02   | 3.94E-01 | 5.76E-01 | 6.12E-03 | 5.40E-03 | 1.20E-01 | 1.75E-01 |
|         | Pred | 0.54             | 0.44               | 0.74               | 1                  | 1.92E-02 | 1.43E-02   | 1.84E-01 | 5.76E-01 | 5.85E-03 | 4.35E-03 | 5.59E-02 | 1.75E-01 |
| E212B   | Expr | 0.89             | 0.49               | 0.77               | 0.96               | 5.48E-02 | 1.68E-02   | 4.14E-02 | 8.02E-02 | 1.67E-02 | 5.11E-03 | 1.26E-02 | 2.44E-02 |
|         | Pred | 1                | 0.45               | 0.79               | 1                  | 5.76E-01 | 1.52E-02   | 2.14E-01 | 5.76E-01 | 1.75E-01 | 4.61E-03 | 6.51E-02 | 1.75E-01 |
| D213A   | Expr | 0.72             | 0.44               | 0.82               | 0.95               | 3.16E-02 | 1.44E-02   | 4.94E-02 | 7.49E-02 | 5.15E-03 | 2.35E-03 | 8.07E-03 | 1.22E-02 |
|         | Pred | 0.56             | 0.05               | 0.69               | 1                  | 2.07E-02 | 1.28E-03   | 1.59E-01 | 5.76E-01 | 3.38E-03 | 2.09E-04 | 2.59E-02 | 9.39E-02 |
| D213B   | Expr | 0.52             | 0.6                | 0.88               | 0.95               | 1.83E-02 | 2.27E-02   | 5.58E-02 | 7.49E-02 | 2.98E-03 | 3.71E-03 | 9.10E-03 | 1.22E-02 |

| Residue |      | $D_0^i$          |                    |                    |                    | $k_{xc}^i$ |          |          |          | $K_u^i$  |          |          |          |
|---------|------|------------------|--------------------|--------------------|--------------------|------------|----------|----------|----------|----------|----------|----------|----------|
|         |      | DSH <sup>a</sup> | min <sup>b,c</sup> | avg <sup>b,d</sup> | max <sup>b,e</sup> | DSH        | min      | avg      | max      | DSH      | min      | avg      | max      |
| L214A   | Pred | 0.41             | 0.52               | 0.98               | 1                  | 1.30E-02   | 1.81E-02 | 5.49E-01 | 5.76E-01 | 2.12E-03 | 2.96E-03 | 8.96E-02 | 9.39E-02 |
| L214A   | Expr | 0.2              | 0.08               | 0.2                | 0.46               | 5.73E-03   | 1.96E-03 | 6.10E-03 | 1.56E-02 | 1.92E-03 | 6.56E-04 | 2.04E-03 | 5.20E-03 |
| L214B   | Pred | 0.18             | 0.03               | 0.17               | 0.49               | 4.93E-03   | 7.46E-04 | 5.08E-03 | 1.68E-02 | 1.65E-03 | 2.50E-04 | 1.70E-03 | 5.62E-03 |
| L214B   | Expr | 0.45             | 0.07               | 0.13               | 0.59               | 1.51E-02   | 1.85E-03 | 3.91E-03 | 2.20E-02 | 5.07E-03 | 6.20E-04 | 1.31E-03 | 7.37E-03 |
| R215A   | Pred | 0.5              | 0.03               | 0.1                | 0.64               | 1.71E-02   | 7.66E-04 | 3.17E-03 | 2.57E-02 | 5.72E-03 | 2.56E-04 | 1.06E-03 | 8.61E-03 |
| R215A   | Expr | 0.89             | 0.67               | 0.85               | 0.93               | 5.42E-02   | 2.80E-02 | 5.05E-02 | 6.57E-02 | 4.26E-03 | 2.20E-03 | 3.97E-03 | 5.16E-03 |
| R215B   | Pred | 0.96             | 0.33               | 0.66               | 0.95               | 7.87E-02   | 9.85E-03 | 3.15E-02 | 7.70E-02 | 6.18E-03 | 7.74E-04 | 2.48E-03 | 6.05E-03 |
| R215B   | Expr | 0.83             | 0.43               | 0.66               | 0.88               | 4.50E-02   | 1.40E-02 | 2.80E-02 | 5.26E-02 | 3.54E-03 | 1.10E-03 | 2.20E-03 | 4.14E-03 |
| Q216A   | Pred | 1                | 0.41               | 0.7                | 1                  | 5.76E-01   | 1.31E-02 | 6.01E-02 | 5.76E-01 | 4.52E-02 | 1.03E-03 | 4.72E-03 | 4.52E-02 |
| Q216A   | Expr | 0.74             | 0.7                | 0.97               | 1                  | 3.40E-02   | 3.03E-02 | 3.92E-01 | 5.76E-01 | 1.04E-03 | 9.27E-04 | 1.20E-02 | 1.76E-02 |
| Q216B   | Pred | 0.71             | 0.5                | 0.74               | 0.93               | 3.06E-02   | 1.75E-02 | 3.62E-02 | 6.75E-02 | 9.37E-04 | 5.36E-04 | 1.11E-03 | 2.06E-03 |
| Q216B   | Expr | 0.72             | 0.04               | 0.35               | 0.73               | 3.20E-02   | 9.79E-04 | 1.22E-02 | 3.31E-02 | 9.77E-04 | 2.99E-05 | 3.72E-04 | 1.01E-03 |
| G217A   | Pred | 0.71             | 0.04               | 0.4                | 0.91               | 3.07E-02   | 9.81E-04 | 1.58E-02 | 6.01E-02 | 9.39E-04 | 3.00E-05 | 4.83E-04 | 1.84E-03 |
| G217A   | Expr | 0.53             | 0.04               | 0.06               | 0.19               | 1.86E-02   | 9.55E-04 | 1.63E-03 | 5.40E-03 | 3.68E-04 | 1.88E-05 | 3.22E-05 | 1.07E-04 |
| G217B   | Pred | 0.51             | 0.03               | 0.04               | 0.05               | 1.78E-02   | 8.35E-04 | 1.05E-03 | 1.28E-03 | 3.52E-04 | 1.65E-05 | 2.08E-05 | 2.53E-05 |
| G217B   | Expr | 0.05             | 0.04               | 0.37               | 0.68               | 1.28E-03   | 9.44E-04 | 1.30E-02 | 2.88E-02 | 2.54E-05 | 1.86E-05 | 2.57E-04 | 5.69E-04 |
| L218A   | Pred | 0.05             | 0.04               | 0.45               | 1                  | 1.28E-03   | 9.43E-04 | 4.35E-02 | 5.76E-01 | 2.53E-05 | 1.86E-05 | 8.58E-04 | 1.14E-02 |
| L218A   | Expr | 0.03             | 0.03               | 0.09               | 0.33               | 7.63E-04   | 7.84E-04 | 2.49E-03 | 1.02E-02 | 1.14E-04 | 1.17E-04 | 3.73E-04 | 1.52E-03 |
| L218B   | Pred | 0.03             | 0.03               | 0.06               | 0.31               | 7.61E-04   | 7.12E-04 | 1.68E-03 | 9.18E-03 | 1.14E-04 | 1.07E-04 | 2.51E-04 | 1.37E-03 |
| L218B   | Expr | 0.3              | 0.4                | 0.73               | 0.97               | 8.74E-03   | 1.30E-02 | 3.64E-02 | 8.66E-02 | 1.31E-03 | 1.94E-03 | 5.44E-03 | 1.30E-02 |
| L219A   | Pred | 0.29             | 0.38               | 0.89               | 1                  | 8.64E-03   | 1.19E-02 | 2.12E-01 | 5.76E-01 | 1.29E-03 | 1.78E-03 | 3.17E-02 | 8.62E-02 |
| L219A   | Expr | 0.67             | 0.21               | 0.76               | 0.96               | 2.77E-02   | 6.02E-03 | 4.19E-02 | 7.89E-02 | 9.95E-03 | 2.16E-03 | 1.51E-02 | 2.84E-02 |
| L219B   | Pred | 0.64             | 0.04               | 0.44               | 0.82               | 2.53E-02   | 9.75E-04 | 1.58E-02 | 4.27E-02 | 9.09E-03 | 3.50E-04 | 5.68E-03 | 1.53E-02 |
| L219B   | Expr | 0.81             | 0.65               | 0.79               | 0.99               | 4.09E-02   | 2.65E-02 | 4.45E-02 | 1.05E-01 | 1.47E-02 | 9.50E-03 | 1.60E-02 | 3.78E-02 |
| K226A   | Pred | 0.78             | 0.68               | 0.98               | 1                  | 3.82E-02   | 2.84E-02 | 5.01E-01 | 5.76E-01 | 1.37E-02 | 1.02E-02 | 1.80E-01 | 2.07E-01 |
| K226A   | Expr | 0.53             | 0.44               | 0.55               | 0.63               | 1.89E-02   | 1.44E-02 | 2.04E-02 | 2.51E-02 | 1.05E-03 | 8.02E-04 | 1.13E-03 | 1.40E-03 |
| K226B   | Pred | 0.86             | 0.4                | 0.76               | 1                  | 4.89E-02   | 1.28E-02 | 8.82E-02 | 5.76E-01 | 2.72E-03 | 7.15E-04 | 4.91E-03 | 3.20E-02 |
| K226B   | Expr | 0.55             | 0.47               | 0.6                | 0.65               | 1.97E-02   | 1.58E-02 | 2.29E-02 | 2.65E-02 | 1.10E-03 | 8.81E-04 | 1.27E-03 | 1.48E-03 |
| V227A   | Pred | 0.96             | 0.56               | 0.71               | 0.98               | 7.77E-02   | 2.06E-02 | 3.47E-02 | 1.01E-01 | 4.32E-03 | 1.14E-03 | 1.93E-03 | 5.61E-03 |
| V227A   | Expr | 0.68             | 0.55               | 0.79               | 0.95               | 2.84E-02   | 2.00E-02 | 4.29E-02 | 7.68E-02 | 6.30E-03 | 4.44E-03 | 9.50E-03 | 1.70E-02 |
| V227B   | Pred | 0.78             | 0.61               | 0.73               | 1                  | 3.82E-02   | 2.36E-02 | 5.97E-02 | 5.76E-01 | 8.46E-03 | 5.23E-03 | 1.32E-02 | 1.27E-01 |
| V227B   | Expr | 0.7              | 0.43               | 0.88               | 1                  | 3.02E-02   | 1.39E-02 | 6.49E-02 | 1.81E-01 | 6.69E-03 | 3.09E-03 | 1.44E-02 | 4.00E-02 |
| S228A   | Pred | 1                | 0.4                | 0.63               | 0.87               | 5.76E-01   | 1.26E-02 | 2.66E-02 | 5.02E-02 | 1.27E-01 | 2.78E-03 | 5.89E-03 | 1.11E-02 |
| S228A   | Expr | 0.86             | 0.51               | 0.78               | 0.96               | 4.99E-02   | 1.77E-02 | 4.13E-02 | 7.79E-02 | 1.71E-03 | 6.08E-04 | 1.42E-03 | 2.67E-03 |
| S228B   | Pred | 1                | 0.34               | 0.73               | 1                  | 1.36E-01   | 1.04E-02 | 1.36E-01 | 5.76E-01 | 4.66E-03 | 3.55E-04 | 4.66E-03 | 1.97E-02 |
| S228B   | Expr | 0.51             | 0.04               | 0.18               | 0.71               | 1.80E-02   | 1.13E-03 | 5.85E-03 | 3.10E-02 | 6.17E-04 | 3.87E-05 | 2.01E-04 | 1.06E-03 |
| F229A   | Pred | 0.63             | 0.03               | 0.12               | 0.83               | 2.51E-02   | 8.28E-04 | 4.52E-03 | 4.50E-02 | 8.60E-04 | 2.84E-05 | 1.55E-04 | 1.54E-03 |
| F229A   | Expr | 0.07             | 0.03               | 0.06               | 0.32               | 1.80E-03   | 8.86E-04 | 1.54E-03 | 9.61E-03 | 9.13E-05 | 4.49E-05 | 7.80E-05 | 4.88E-04 |
| F229B   | Pred | 0.07             | 0.03               | 0.06               | 0.35               | 1.82E-03   | 8.83E-04 | 1.58E-03 | 1.06E-02 | 9.22E-05 | 4.48E-05 | 8.00E-05 | 5.39E-04 |
| F229B   | Expr | 0.7              | 0.18               | 0.36               | 0.85               | 3.02E-02   | 4.99E-03 | 1.28E-02 | 4.71E-02 | 1.53E-03 | 2.53E-04 | 6.48E-04 | 2.39E-03 |
| L230A   | Pred | 1                | 0.04               | 0.22               | 0.88               | 5.76E-01   | 1.09E-03 | 8.76E-03 | 5.35E-02 | 2.92E-02 | 5.54E-05 | 4.44E-04 | 2.71E-03 |
| L230A   | Expr | 0.56             | 0.42               | 0.52               | 0.63               | 2.04E-02   | 1.36E-02 | 1.85E-02 | 2.50E-02 | 3.94E-03 | 2.63E-03 | 3.56E-03 | 4.83E-03 |
|         | Pred | 1                | 0.46               | 0.71               | 1                  | 5.76E-01   | 1.55E-02 | 8.86E-02 | 5.76E-01 | 1.11E-01 | 3.00E-03 | 1.71E-02 | 1.11E-01 |

| Residue |      | $D_0^i$          |                    |                    |                    | $k_{xc}^i$ |          |          |          | $K_u^i$  |          |          |          |
|---------|------|------------------|--------------------|--------------------|--------------------|------------|----------|----------|----------|----------|----------|----------|----------|
|         |      | DSH <sup>a</sup> | min <sup>b,c</sup> | avg <sup>b,d</sup> | max <sup>b,e</sup> | DSH        | min      | avg      | max      | DSH      | min      | avg      | max      |
| L230B   | Expr | 0.3              | 0.34               | 0.6                | 0.66               | 8.91E-03   | 1.03E-02 | 2.29E-02 | 2.69E-02 | 1.72E-03 | 1.98E-03 | 4.42E-03 | 5.19E-03 |
|         | Pred | 0.31             | 0.33               | 0.74               | 0.95               | 9.41E-03   | 1.02E-02 | 3.73E-02 | 7.26E-02 | 1.82E-03 | 1.96E-03 | 7.20E-03 | 1.40E-02 |
| E235A   | Expr | 0.9              | 0.86               | 0.98               | 1                  | 5.81E-02   | 4.88E-02 | 4.10E-01 | 5.76E-01 | 1.53E-02 | 1.29E-02 | 1.08E-01 | 1.52E-01 |
|         | Pred | 1                | 0.68               | 0.98               | 1                  | 5.76E-01   | 2.83E-02 | 5.50E-01 | 5.76E-01 | 1.52E-01 | 7.47E-03 | 1.45E-01 | 1.52E-01 |
| E235B   | Expr | 0.79             | 0.71               | 0.82               | 0.96               | 3.93E-02   | 3.13E-02 | 4.45E-02 | 8.15E-02 | 1.04E-02 | 8.27E-03 | 1.17E-02 | 2.15E-02 |
|         | Pred | 0.55             | 0.4                | 0.75               | 1                  | 1.99E-02   | 1.30E-02 | 8.84E-02 | 5.76E-01 | 5.26E-03 | 3.43E-03 | 2.33E-02 | 1.52E-01 |
| Y236A   | Expr | 0.78             | 0.44               | 0.65               | 0.86               | 3.77E-02   | 1.45E-02 | 2.75E-02 | 4.86E-02 | 5.76E-03 | 2.21E-03 | 4.20E-03 | 7.43E-03 |
|         | Pred | 0.73             | 0.17               | 0.42               | 1                  | 3.29E-02   | 4.79E-03 | 1.92E-02 | 1.39E-01 | 5.03E-03 | 7.32E-04 | 2.94E-03 | 2.12E-02 |
| Y236B   | Expr | 0.81             | 0.75               | 0.89               | 1                  | 4.11E-02   | 3.51E-02 | 8.03E-02 | 5.76E-01 | 6.28E-03 | 5.36E-03 | 1.23E-02 | 8.80E-02 |
|         | Pred | 0.56             | 0.55               | 0.91               | 1                  | 2.05E-02   | 2.00E-02 | 3.54E-01 | 5.76E-01 | 3.13E-03 | 3.05E-03 | 5.41E-02 | 8.80E-02 |
| T237A   | Expr | 0.22             | 0.05               | 0.89               | 1                  | 6.18E-03   | 1.23E-03 | 3.57E-01 | 5.76E-01 | 3.77E-04 | 7.50E-05 | 2.18E-02 | 3.51E-02 |
|         | Pred | 0.09             | 0.02               | 0.58               | 1                  | 2.30E-03   | 5.60E-04 | 1.56E-01 | 5.76E-01 | 1.41E-04 | 3.42E-05 | 9.54E-03 | 3.51E-02 |
| T237B   | Expr | 0.86             | 0.74               | 0.99               | 1                  | 4.90E-02   | 3.39E-02 | 5.50E-01 | 5.76E-01 | 2.99E-03 | 2.07E-03 | 3.35E-02 | 3.51E-02 |
|         | Pred | 0.49             | 0.49               | 0.85               | 1                  | 1.71E-02   | 1.70E-02 | 2.47E-01 | 5.76E-01 | 1.04E-03 | 1.03E-03 | 1.51E-02 | 3.51E-02 |
| K238A   | Expr | 0.88             | 0.88               | 0.99               | 1                  | 5.37E-02   | 5.39E-02 | 5.51E-01 | 5.76E-01 | 2.16E-03 | 2.17E-03 | 2.22E-02 | 2.32E-02 |
|         | Pred | 0.56             | 0.55               | 0.92               | 1                  | 2.05E-02   | 2.02E-02 | 4.23E-01 | 5.76E-01 | 8.26E-04 | 8.13E-04 | 1.70E-02 | 2.32E-02 |
| K238B   | Expr | 0.78             | 0.18               | 0.77               | 1                  | 3.78E-02   | 5.07E-03 | 2.89E-01 | 5.76E-01 | 1.53E-03 | 2.04E-04 | 1.16E-02 | 2.32E-02 |
|         | Pred | 0.45             | 0.02               | 0.21               | 0.75               | 1.49E-02   | 4.84E-04 | 7.18E-03 | 3.47E-02 | 6.01E-04 | 1.95E-05 | 2.89E-04 | 1.40E-03 |
| K239A   | Expr | 1                | 1                  | 1                  | 1                  | 5.76E-01   | 5.76E-01 | 5.76E-01 | 5.76E-01 | 2.79E-02 | 2.79E-02 | 2.79E-02 | 2.79E-02 |
|         | Pred | 1                | 0.47               | 0.89               | 1                  | 5.76E-01   | 1.58E-02 | 3.45E-01 | 5.76E-01 | 2.79E-02 | 7.67E-04 | 1.67E-02 | 2.79E-02 |
| K239B   | Expr | 1                | 1                  | 1                  | 1                  | 5.76E-01   | 5.76E-01 | 5.76E-01 | 5.76E-01 | 2.79E-02 | 2.79E-02 | 2.79E-02 | 2.79E-02 |
|         | Pred | 0.7              | 0.48               | 0.86               | 1                  | 3.03E-02   | 1.64E-02 | 2.69E-01 | 5.76E-01 | 1.47E-03 | 7.96E-04 | 1.30E-02 | 2.79E-02 |
| L240A   | Expr | 1                | 0.09               | 0.35               | 1                  | 5.76E-01   | 2.25E-03 | 3.92E-02 | 5.76E-01 | 9.67E-02 | 3.79E-04 | 6.59E-03 | 9.67E-02 |
|         | Pred | 0.85             | 0.04               | 0.19               | 0.87               | 4.67E-02   | 9.55E-04 | 6.95E-03 | 5.06E-02 | 7.85E-03 | 1.61E-04 | 1.17E-03 | 8.50E-03 |
| L240B   | Expr | 1                | 1                  | 1                  | 1                  | 5.76E-01   | 5.76E-01 | 5.76E-01 | 5.76E-01 | 9.67E-02 | 9.67E-02 | 9.67E-02 | 9.67E-02 |
|         | Pred | 0.74             | 0.52               | 0.78               | 1                  | 3.34E-02   | 1.83E-02 | 6.54E-02 | 5.76E-01 | 5.61E-03 | 3.07E-03 | 1.10E-02 | 9.67E-02 |
| N241A   | Expr | 1                | 0.09               | 0.85               | 1                  | 5.76E-01   | 2.43E-03 | 3.23E-01 | 5.76E-01 | 1.76E-02 | 7.44E-05 | 9.86E-03 | 1.76E-02 |
|         | Pred | 1                | 0.04               | 0.45               | 1                  | 5.76E-01   | 1.07E-03 | 4.34E-02 | 5.76E-01 | 1.76E-02 | 3.28E-05 | 1.33E-03 | 1.76E-02 |
| N241B   | Expr | 1                | 0.19               | 0.69               | 1                  | 5.76E-01   | 5.39E-03 | 2.58E-01 | 5.76E-01 | 1.76E-02 | 1.65E-04 | 7.88E-03 | 1.76E-02 |
|         | Pred | 1                | 0.03               | 0.2                | 1                  | 5.76E-01   | 7.39E-04 | 3.21E-02 | 5.76E-01 | 1.76E-02 | 2.26E-05 | 9.81E-04 | 1.76E-02 |
| T242A   | Expr | 1                | 0.91               | 1                  | 1                  | 5.76E-01   | 6.15E-02 | 5.51E-01 | 5.76E-01 | 1.89E-02 | 2.01E-03 | 1.81E-02 | 1.89E-02 |
|         | Pred | 1                | 0.25               | 0.74               | 1                  | 5.76E-01   | 7.08E-03 | 1.60E-01 | 5.76E-01 | 1.89E-02 | 2.32E-04 | 5.23E-03 | 1.89E-02 |
| T242B   | Expr | 0.56             | 0.08               | 0.43               | 1                  | 2.07E-02   | 2.20E-03 | 6.75E-02 | 5.76E-01 | 6.80E-04 | 7.20E-05 | 2.21E-03 | 1.89E-02 |
|         | Pred | 0.41             | 0.03               | 0.09               | 0.46               | 1.30E-02   | 8.45E-04 | 2.65E-03 | 1.56E-02 | 4.27E-04 | 2.77E-05 | 8.69E-05 | 5.10E-04 |
| Q243A   | Expr | 1                | 1                  | 1                  | 1                  | 5.76E-01   | 5.76E-01 | 5.76E-01 | 5.76E-01 | 1.16E+00 | 1.16E+00 | 1.16E+00 | 1.16E+00 |
|         | Pred | 0.8              | 0.57               | 0.92               | 1                  | 3.99E-02   | 2.12E-02 | 3.74E-01 | 5.76E-01 | 8.05E-02 | 4.29E-02 | 7.56E-01 | 1.16E+00 |
| Q243B   | Expr | 0.99             | 0.11               | 0.66               | 1                  | 1.17E-01   | 3.03E-03 | 1.85E-01 | 5.76E-01 | 2.37E-01 | 6.13E-03 | 3.73E-01 | 1.16E+00 |
|         | Pred | 0.65             | 0.02               | 0.19               | 1                  | 2.64E-02   | 5.63E-04 | 3.17E-02 | 5.76E-01 | 5.34E-02 | 1.14E-03 | 6.41E-02 | 1.16E+00 |

a The Double Super Helix model of nascent HDL

b Data obtained from the simulation trajectory

c Averaged over trajectory

d Minimum value

e Maximum value

f Experimentally derived value

g Predicted value from the model/trajectory
